# Supplementary material for: HetL, HetR and PatS form a reaction-diffusion system to control pattern formation in the cyanobacterium nostoc PCC 7120
Source: eLife journal article supplement (doi:10.7554/elife.59190), 2020-08-07
Supplement: supp [file elife-59190-supp-v1.zip]

Archive with 17 entries (17 files):
- elife_poa_e59190_Supplementary_File.docx
- elife_poa_e59190_Transparent_Reporting_File.pdf
- elife_poa_e59190_Figure_1_figure_supplement_1.jpg
- elife_poa_e59190_Figure_2_figure_supplement_1.jpg
- elife_poa_e59190_Figure_2_figure_supplement_2.jpg
- elife_poa_e59190_Figure_2_figure_supplement_3.jpg
- elife_poa_e59190_Figure_4_figure_supplement_1.jpg
- elife_poa_e59190_Figure_1_source_data_1.xlsx
- elife_poa_e59190_Figure_1_source_data_2.xlsx
- elife_poa_e59190_Figure_2_source_data_2.xlsx
- elife_poa_e59190_Figure_2_source_data_2.xlsx
- elife_poa_e59190_Figure_2_figure_supplement_2_source_data_1.xlsx
- elife_poa_e59190_Figure_3_source_data_1.xlsx
- elife_poa_e59190_Figure_4_source_data_1.xlsx
- elife_poa_e59190_Figure_5_source_data_1.xlsx
- elife_poa_e59190_Figure_6_source_data_1.xlsx
- elife_poa_e59190_Figure_7_source_data_1.xlsx
