# Supplementary material for: HetL, HetR and PatS form a reaction-diffusion system to control pattern formation in the cyanobacterium nostoc PCC 7120
Source: eLife journal article supplement (doi:10.7554/elife.59190), 2020-08-07
Supplement: supp [file elife-59190-supp-v1.zip › elife_poa_e59190_Figure_1_source_data_1.xlsx]

## Sheet: Feuil1
Fig 1B. (upper) Bacterial two hybrid assay between HetL and HetR. BTH101 strain was transformed with pKT25-HetL and pUT18C-HetR, β-galactosidase activities were measured as described in section “Materials and Methods” and were expressed in Miller units. Strains producing the T18 with T25 (control -), T25-HetR with T18 (HetR) and T25 with T18-HetL (HetL) served as negative controls. Strains produc…
Raw data for b-galactosidase activities presented in figure 1B							b-galactosidase activities presented in figure 1B
Three independent assays	OD600	OD420 at T1	OD420 at T2	Miller units
Time (s)		0	240				Sample	Average Miller units	STDEV
Temperature (˚C)		28.6	28.4				HetR	11.6775	1.20622
HetR	0.452	0.1399	0.1566	10.318			HetL	11.5429	1.1655
HetR	0.4525	0.1341	0.1537	12.0948			HetL-HetRhood	854.462	45.9796
HetR	0.4515	0.1344	0.1548	12.6196			HetL-HetR	680.489	20.3714
HetL	0.518	0.1405	0.1633	12.1113			HetL-HetL	721.592	98.9263
HetL	0.5203	0.1411	0.1604	10.2023			HetR-HetR	973.974	9.36217
HetL	0.496	0.1356	0.1577	12.3152			Control +	958.205	48.516
HetL-HetRhood	0.5485	0.4958	2.3131	906.595			Control -	13.4028	1.23133
HetL-HetRhood	0.6267	0.4236	2.3231	819.692
HetL-HetRhood	0.5976	0.4134	2.2558	837.099
HetL-HetR	0.4995	0.3703	1.6434	703.941
HetL-HetR	0.4805	0.3422	1.5036	670.348
HetL-HetR	0.5086	0.3606	1.5915	667.179
HetL-HetL	0.5112	0.4277	1.8684	776.518
HetL-HetL	0.5163	0.3657	1.505	607.389
HetL-HetL	0.5163	0.4272	1.8919	780.868
HetR-HetR	0.4828	0.4795	2.1592	964.384
HetR-HetR	0.4762	0.4735	2.145	974.446
HetR-HetR	0.4914	0.4975	2.2436	983.091
Control +	0.4693	0.5091	2.0916	937.648
Control +	0.4803	0.5058	2.1048	923.352
Control +	0.4856	0.5219	2.2987	1013.62
Control -	0.3058	0.1031	0.1157	12.1888
Control -	0.2965	0.107	0.1216	14.6508
Control -	0.326	0.1046	0.1195	13.3688
