# Supplementary material for: HetL, HetR and PatS form a reaction-diffusion system to control pattern formation in the cyanobacterium nostoc PCC 7120
Source: eLife journal article supplement (doi:10.7554/elife.59190), 2020-08-07
Supplement: supp [file elife-59190-supp-v1.zip › elife_poa_e59190_Figure_1_source_data_2.xlsx]

## Sheet: Feuil1
Fig 1C. BLi assay between HetL and HetR. 2.2 µM of biotinylated HetR was loaded onto streptavidin biosensors. A 30 second baseline in PBS was performed before a 120 second association step with various concentrations of HetL at 2.5, 5, 10 and 20 µM followed by a 120 second dissociation step.
Time (s)	Binding response (nm)
	2.5 µM HetL	5 µM HetL	10 µM HetL	20 µM HetL
0	0	0	0	0
0.2	0.00645506	-0.0051832	-0.000490058	-0.00606967
0.4	0.0136118	-0.00403703	-0.00154882	-0.0062426
0.6	0.0205096	-0.00376433	-0.00245713	-0.00696411
0.8	0.0257356	-0.00255283	-0.00468394	-0.00853609
1	0.0306287	-0.00158004	-0.00642733	-0.0100795
1.2	0.0350656	0.000642762	-0.007404	-0.0100376
1.4	0.0365846	0.000574308	-0.00859896	-0.0105272
1.6	0.0383641	0.00170577	-0.00886458	-0.0117803
1.8	0.0393701	0.00176623	-0.00951095	-0.0129255
2	0.0407162	0.00252604	-0.00856972	-0.0113952
2.2	0.0410904	0.00290213	-0.00991664	-0.0119723
2.4	0.0430347	0.00480101	-0.00949713	-0.0130658
2.6	0.0441412	0.00550517	-0.0107002	-0.0127763
2.8	0.0456359	0.00500965	-0.0116351	-0.0131773
3	0.0463269	0.00529439	-0.0130655	-0.015462
3.2	0.0472635	0.00548792	-0.013924	-0.0151572
3.4	0.048085	0.00353643	-0.0149294	-0.0147161
3.6	0.0489861	0.002605	-0.0158095	-0.0151666
3.8	0.0486388	0.00345514	-0.0140543	-0.014341
4	0.0480896	0.00293049	-0.0138095	-0.0131076
4.2	0.0474181	0.00382946	-0.0136169	-0.0127642
4.4	0.0478574	0.00340246	-0.0131921	-0.0136439
4.6	0.0471836	0.0039409	-0.0126092	-0.0140571
4.8	0.0473449	0.00406507	-0.0140444	-0.0141101
5	0.0481337	0.00397852	-0.0150503	-0.0151752
5.2	0.0485379	0.00405468	-0.0146739	-0.0148099
5.4	0.0469231	0.00519173	-0.015756	-0.0153144
5.6	0.0468162	0.0063085	-0.015118	-0.0144982
5.8	0.0467188	0.00610259	-0.0155016	-0.0153553
6	0.0464928	0.00635216	-0.0155499	-0.0144361
6.2	0.0468878	0.00573824	-0.0155038	-0.0152672
6.4	0.0474272	0.00569155	-0.014352	-0.014858
6.6	0.0482667	0.00387186	-0.0152645	-0.0151139
6.8	0.0475763	0.00504298	-0.0151971	-0.0144266
7	0.0484129	0.00470493	-0.013978	-0.0147835
7.2	0.0481258	0.00323152	-0.0141086	-0.0150554
7.4	0.0495546	0.00311451	-0.0140321	-0.0146919
7.6	0.0487626	0.00422727	-0.0127626	-0.0142422
7.8	0.0492979	0.00341473	-0.0120151	-0.0144618
8	0.0492174	0.00396485	-0.0127339	-0.0145913
8.2	0.0501925	0.00503281	-0.0127252	-0.0147897
8.4	0.0491406	0.00442123	-0.0132113	-0.0140298
8.6	0.0502036	0.0039174	-0.0146837	-0.0151138
8.8	0.0502864	0.0034788	-0.0151421	-0.0149785
9	0.05054	0.00323255	-0.0144688	-0.0163634
9.2	0.0497985	0.00249566	-0.0148547	-0.0161343
9.4	0.0495689	0.00260124	-0.0160508	-0.0175205
9.6	0.0500578	0.00204502	-0.0159844	-0.0170984
9.8	0.0495633	0.00175621	-0.0155823	-0.0166045
10	0.0491192	0.0031422	-0.0166914	-0.0158518
10.2	0.0479093	0.00257214	-0.0164964	-0.0170602
10.4	0.0473342	0.00280925	-0.0150503	-0.0164191
10.6	0.0470754	0.00366213	-0.0147889	-0.0169072
10.8	0.0472824	0.00514839	-0.0153149	-0.0171762
11	0.0466678	0.00322684	-0.0145571	-0.0160737
11.2	0.0472618	0.00413001	-0.0147709	-0.0147091
11.4	0.0485774	0.00444556	-0.0153973	-0.0151742
11.6	0.0478396	0.00454461	-0.0160786	-0.0143151
11.8	0.048541	0.00264863	-0.0163188	-0.0153557
12	0.0493031	0.00325368	-0.0166376	-0.0159935
12.2	0.0491453	0.0027988	-0.0162104	-0.015415
12.4	0.0496164	0.00322762	-0.0162098	-0.0164021
12.6	0.0502931	0.00254417	-0.0162705	-0.0165722
12.8	0.0495956	0.00326178	-0.0153504	-0.0162016
13	0.0491502	0.00444242	-0.0151665	-0.0154594
13.2	0.0499772	0.00484568	-0.0146153	-0.0161269
13.4	0.0486486	0.00427868	-0.0143279	-0.0152292
13.6	0.0480336	0.00345083	-0.0131201	-0.0156279
13.8	0.0488461	0.00389916	-0.0127586	-0.0148393
14	0.0490171	0.00164518	-0.0129406	-0.0162094
14.2	0.049159	0.00152065	-0.0133932	-0.0165927
14.4	0.0491334	0.00157882	-0.0129129	-0.0176762
14.6	0.0495148	0.00293762	-0.0137102	-0.0162849
14.8	0.0485936	0.00167171	-0.0149652	-0.0166591
15	0.049232	0.00339082	-0.0149371	-0.0153616
15.2	0.0487097	0.00251706	-0.0156723	-0.0145667
15.4	0.0492481	0.0029211	-0.0165935	-0.0136916
15.6	0.0479421	0.00184348	-0.0170524	-0.0152293
15.8	0.0485197	0.0025535	-0.015696	-0.0137675
16	0.0472933	0.0010449	-0.0169172	-0.0137034
16.2	0.0478451	0.00164075	-0.0153856	-0.0142141
16.4	0.0469493	0.0021747	-0.0152047	-0.0138628
16.6	0.0477983	0.00226	-0.015259	-0.0132603
16.8	0.0475902	0.0012801	-0.0167101	-0.0136945
17	0.0481712	0.00249255	-0.0155641	-0.0136724
17.2	0.0470718	0.00321628	-0.0164802	-0.0140206
17.4	0.0484869	0.0027192	-0.016646	-0.0139928
17.6	0.047991	0.00352265	-0.0167818	-0.0146187
17.8	0.048282	0.0054431	-0.0158129	-0.0152407
18	0.0478677	0.0048345	-0.0157669	-0.014827
18.2	0.0488325	0.00409085	-0.0154402	-0.0150992
18.4	0.0479735	0.0042787	-0.0152186	-0.0144444
18.6	0.0475686	0.00376865	-0.0148669	-0.0141262
18.8	0.0474257	0.00336035	-0.0150492	-0.0138548
19	0.0477753	0.00222065	-0.0149603	-0.0162065
19.2	0.0470585	0.0021263	-0.0145277	-0.015614
19.4	0.0464695	0.00185155	-0.0154324	-0.0164472
19.6	0.0478684	0.00180635	-0.0148247	-0.015125
19.8	0.0481302	0.0013192	-0.0147312	-0.0161199
20	0.0478304	0.0023448	-0.0151692	-0.0142682
20.2	0.0495246	0.00214545	-0.0160099	-0.0141338
20.4	0.0500191	0.00224045	-0.0155613	-0.0135561
20.6	0.0490186	0.00171165	-0.0157357	-0.0151654
20.8	0.0493659	0.0020951	-0.0149519	-0.0154891
21	0.0484341	0.00174875	-0.0156419	-0.0152055
21.2	0.047186	0.00138435	-0.0150942	-0.0152399
21.4	0.0471471	0.00027265	-0.0163295	-0.0156633
21.6	0.0475667	0.00173075	-0.015766	-0.0146311
21.8	0.0472726	0.0015755	-0.0164475	-0.0133366
22	0.0475948	0.0022769	-0.0157215	-0.0134056
22.2	0.0475344	0.0033483	-0.01573	-0.0131354
22.4	0.0474463	0.00406355	-0.0138297	-0.013009
22.6	0.046451	0.0026231	-0.0143469	-0.0136792
22.8	0.0459871	0.0023076	-0.014461	-0.0143643
23	0.0472843	0.00136931	-0.0144945	-0.0143987
23.2	0.0465864	0.00229795	-0.0154793	-0.0134578
23.4	0.0462899	0.00169086	-0.0156707	-0.0121305
23.6	0.0460544	0.0029685	-0.0148144	-0.0119532
23.8	0.046673	0.0038493	-0.0141819	-0.0107172
24	0.0450133	0.00426015	-0.0147502	-0.011009
24.2	0.0460415	0.00357035	-0.0145985	-0.0129274
24.4	0.0470135	0.00399595	-0.0154683	-0.0145956
24.6	0.0470013	0.0020838	-0.0165069	-0.0142895
24.8	0.0466921	0.0009847	-0.0183633	-0.0149846
25	0.047764	-7.314e-05	-0.0171095	-0.0141302
25.2	0.0473192	-0.0024946	-0.0171414	-0.0138886
25.4	0.0468268	-0.00182459	-0.0166696	-0.0132227
25.6	0.0473492	-0.00241027	-0.0157668	-0.0134305
25.8	0.0475042	-0.00254334	-0.0145451	-0.0138119
26	0.0468121	-0.00259086	-0.014238	-0.0138576
26.2	0.0473492	-0.00033241	-0.0142047	-0.0131876
26.4	0.0463584	-0.00063148	-0.0139346	-0.0136855
26.6	0.0464381	-0.00015546	-0.0144413	-0.0140875
26.8	0.0463779	0.0014817	-0.0147663	-0.0132732
27	0.0476443	0.00227595	-0.0157199	-0.0142926
27.2	0.046513	0.00112613	-0.0148886	-0.0144619
27.4	0.0472923	0.00078838	-0.0158576	-0.0127782
27.6	0.0475025	0.00107237	-0.015551	-0.0123885
27.8	0.0467019	-2.296e-05	-0.0150175	-0.0130756
28	0.0454671	-0.00061396	-0.0153834	-0.0125856
28.2	0.0466386	-0.0001636	-0.0166536	-0.012921
28.4	0.0467818	0.00101575	-0.0159478	-0.0145021
28.6	0.0460131	0.00080582	-0.0166901	-0.0144961
28.8	0.0471937	0.00174425	-0.0175992	-0.01517
29	0.0476936	0.0024938	-0.0166016	-0.01557
29.2	0.0469349	0.00331885	-0.0149371	-0.0149231
29.4	0.0463116	0.0027711	-0.0151495	-0.0151625
29.6	0.0454531	0.0030744	-0.0149907	-0.0154883
29.8	0.0442654	0.00237851	-0.0147508	-0.0149678
30	0.063697	0.0453885	0.0286515	0.0136705
30.2	0.0694191	0.0549885	0.0546325	0.0653835
30.4	0.080755	0.0697325	0.0970395	0.133729
30.6	0.085784	0.088549	0.124203	0.192772
30.8	0.0929544	0.103696	0.161477	0.23322
31	0.101772	0.11836	0.188084	0.280228
31.2	0.111973	0.134428	0.217831	0.31904
31.4	0.118238	0.148473	0.241548	0.346171
31.6	0.126221	0.161171	0.262807	0.366101
31.8	0.132519	0.171653	0.27774	0.385085
32	0.137247	0.183975	0.294249	0.400664
32.2	0.140968	0.195257	0.30597	0.410262
32.4	0.1494	0.204012	0.317314	0.420698
32.6	0.156113	0.212181	0.327318	0.43036
32.8	0.16164	0.222002	0.334894	0.433622
33	0.165008	0.226215	0.341077	0.436636
33.2	0.169103	0.230697	0.349554	0.440792
33.4	0.170624	0.237342	0.354749	0.442807
33.6	0.170905	0.24154	0.358683	0.445734
33.8	0.174159	0.24554	0.36569	0.448297
34	0.179443	0.250552	0.367589	0.450833
34.2	0.184924	0.253532	0.3711	0.4516
34.4	0.187903	0.257373	0.374101	0.453839
34.6	0.193012	0.261231	0.377718	0.453624
34.8	0.197103	0.264414	0.378768	0.455034
35	0.201126	0.268215	0.38159	0.457404
35.2	0.200994	0.268819	0.381537	0.461388
35.4	0.204359	0.27004	0.383793	0.460775
35.6	0.205919	0.270868	0.384046	0.463306
35.8	0.206942	0.271866	0.387192	0.465661
36	0.207496	0.271145	0.391526	0.464678
36.2	0.209509	0.273869	0.393486	0.465361
36.4	0.211777	0.276163	0.39281	0.468053
36.6	0.213105	0.277747	0.395433	0.468827
36.8	0.213968	0.279807	0.39627	0.469858
37	0.216585	0.280936	0.393536	0.472417
37.2	0.217093	0.283102	0.395352	0.472276
37.4	0.218696	0.28535	0.397514	0.471284
37.6	0.219758	0.285932	0.397045	0.471656
37.8	0.222383	0.286238	0.397244	0.47056
38	0.221165	0.288949	0.400222	0.4712
38.2	0.223897	0.289712	0.400792	0.471468
38.4	0.222964	0.289461	0.402063	0.472332
38.6	0.224482	0.290987	0.403858	0.472015
38.8	0.226936	0.292285	0.405777	0.472585
39	0.230417	0.29269	0.406169	0.47494
39.2	0.230315	0.292482	0.407047	0.47603
39.4	0.233153	0.292913	0.407871	0.477929
39.6	0.233968	0.29357	0.408534	0.479618
39.8	0.231819	0.293291	0.407829	0.479836
40	0.231932	0.29283	0.406857	0.475959
40.2	0.231754	0.293615	0.408322	0.473217
40.4	0.232114	0.293768	0.410726	0.473929
40.6	0.233988	0.293284	0.410708	0.472428
40.8	0.234189	0.294063	0.411368	0.47376
41	0.236451	0.295276	0.413489	0.475765
41.2	0.238036	0.296313	0.412844	0.477322
41.4	0.238152	0.296184	0.411589	0.477099
41.6	0.23798	0.297956	0.411768	0.479122
41.8	0.24068	0.29952	0.413236	0.478224
42	0.23951	0.299969	0.414899	0.476386
42.2	0.23996	0.300192	0.413964	0.476881
42.4	0.240833	0.302473	0.412834	0.479578
42.6	0.239492	0.303912	0.413064	0.479862
42.8	0.238421	0.303802	0.412584	0.48173
43	0.240624	0.303779	0.409579	0.484681
43.2	0.240864	0.305233	0.410569	0.484882
43.4	0.242135	0.304751	0.409504	0.483075
43.6	0.244971	0.303993	0.410347	0.480381
43.8	0.246842	0.306147	0.411408	0.479924
44	0.247114	0.306358	0.412465	0.479695
44.2	0.248006	0.305125	0.41355	0.481622
44.4	0.247697	0.304307	0.416241	0.478704
44.6	0.246223	0.304129	0.415834	0.479173
44.8	0.245711	0.302855	0.416402	0.479258
45	0.243759	0.304434	0.416927	0.477877
45.2	0.243045	0.303879	0.417916	0.475584
45.4	0.242909	0.305365	0.416758	0.478952
45.6	0.244645	0.308124	0.417874	0.48139
45.8	0.242352	0.307909	0.418313	0.482109
46	0.243257	0.307522	0.418001	0.483237
46.2	0.244725	0.308504	0.416888	0.485366
46.4	0.246609	0.309858	0.417531	0.483867
46.6	0.245815	0.308912	0.415818	0.48215
46.8	0.247097	0.308761	0.416302	0.480217
47	0.248052	0.309362	0.415881	0.481295
47.2	0.248013	0.310263	0.415701	0.481154
47.4	0.247958	0.308696	0.417179	0.482305
47.6	0.248425	0.307472	0.41805	0.482193
47.8	0.249968	0.307864	0.415944	0.48376
48	0.251726	0.306658	0.416797	0.483314
48.2	0.250692	0.307359	0.418192	0.482928
48.4	0.250256	0.306082	0.417708	0.481934
48.6	0.248884	0.306986	0.419845	0.484702
48.8	0.249787	0.304776	0.422399	0.485044
49	0.246188	0.305297	0.42135	0.483524
49.2	0.246006	0.305222	0.422455	0.484287
49.4	0.246087	0.306693	0.422419	0.486722
49.6	0.246016	0.307883	0.42192	0.48348
49.8	0.246904	0.309628	0.419806	0.484557
50	0.248729	0.310551	0.421279	0.485877
50.2	0.250725	0.310759	0.418199	0.485368
50.4	0.249592	0.312619	0.41857	0.484523
50.6	0.251026	0.31345	0.41897	0.48753
50.8	0.249966	0.312218	0.420754	0.487208
51	0.247596	0.310142	0.421868	0.487331
51.2	0.24693	0.30998	0.422924	0.48662
51.4	0.248638	0.308422	0.422727	0.485783
51.6	0.250215	0.307174	0.422257	0.483363
51.8	0.248833	0.307414	0.421949	0.482108
52	0.252159	0.307974	0.420996	0.481762
52.2	0.251509	0.308117	0.422062	0.482228
52.4	0.250507	0.308482	0.423537	0.48132
52.6	0.248746	0.308968	0.424132	0.482499
52.8	0.248707	0.31091	0.423136	0.483259
53	0.247675	0.311864	0.423935	0.483197
53.2	0.25038	0.313186	0.423194	0.483669
53.4	0.2521	0.313891	0.423244	0.485671
53.6	0.255196	0.313051	0.422052	0.486146
53.8	0.256517	0.313216	0.424323	0.485603
54	0.258084	0.312783	0.423192	0.485744
54.2	0.253873	0.310914	0.422896	0.486144
54.4	0.254209	0.310607	0.421101	0.486374
54.6	0.254509	0.309966	0.423974	0.487253
54.8	0.254777	0.309656	0.423215	0.487758
55	0.253661	0.310509	0.424619	0.488365
55.2	0.256353	0.311206	0.426199	0.488867
55.4	0.255619	0.311418	0.427102	0.486468
55.6	0.251569	0.310797	0.424472	0.485523
55.8	0.251414	0.309963	0.42524	0.48491
56	0.254004	0.310141	0.425048	0.484572
56.2	0.253518	0.310215	0.42373	0.481578
56.4	0.254363	0.311369	0.423633	0.483601
56.6	0.256672	0.314271	0.423971	0.482915
56.8	0.256244	0.314031	0.422236	0.482846
57	0.253758	0.313494	0.422763	0.48146
57.2	0.252723	0.312717	0.423303	0.482138
57.4	0.250364	0.310976	0.422639	0.481108
57.6	0.251342	0.309769	0.422204	0.481342
57.8	0.251685	0.310956	0.422435	0.480396
58	0.252267	0.311247	0.422114	0.480181
58.2	0.253001	0.312482	0.420518	0.480062
58.4	0.254795	0.313076	0.423533	0.477797
58.6	0.255125	0.311171	0.42394	0.477445
58.8	0.255823	0.310398	0.424729	0.477189
59	0.256266	0.310236	0.425256	0.478304
59.2	0.258589	0.310008	0.426891	0.480541
59.4	0.257596	0.309209	0.424029	0.48382
59.6	0.256289	0.312002	0.423588	0.485266
59.8	0.256414	0.312509	0.42287	0.485708
60	0.256738	0.310383	0.423019	0.48632
60.2	0.256856	0.308612	0.424475	0.48333
60.4	0.258684	0.310683	0.424327	0.482074
60.6	0.257644	0.308812	0.425252	0.479647
60.8	0.257096	0.308017	0.425021	0.47997
61	0.256105	0.308948	0.424196	0.478314
61.2	0.257876	0.30989	0.42457	0.478965
61.4	0.254738	0.308801	0.425081	0.481749
61.6	0.25537	0.309219	0.425537	0.482404
61.8	0.256994	0.309175	0.42821	0.481036
62	0.258224	0.31073	0.428912	0.481388
62.2	0.257672	0.310354	0.429209	0.482221
62.4	0.260322	0.309375	0.430972	0.479793
62.6	0.262041	0.3096	0.43055	0.480658
62.8	0.262487	0.310374	0.428634	0.480381
63	0.262761	0.307562	0.429585	0.482726
63.2	0.260835	0.30742	0.427978	0.482477
63.4	0.261855	0.308286	0.425989	0.482137
63.6	0.260745	0.307233	0.427813	0.482098
63.8	0.259958	0.305757	0.430113	0.483294
64	0.259908	0.309199	0.42887	0.482109
64.2	0.259654	0.309457	0.428652	0.481258
64.4	0.259003	0.310817	0.429605	0.480833
64.6	0.260867	0.311599	0.429002	0.48245
64.8	0.260364	0.313968	0.427714	0.482465
65	0.261275	0.312034	0.427555	0.481791
65.2	0.262294	0.311157	0.427353	0.481971
65.4	0.263413	0.307686	0.427265	0.482131
65.6	0.26043	0.30891	0.424966	0.481307
65.8	0.261623	0.307366	0.424592	0.480291
66	0.260332	0.30918	0.424576	0.478933
66.2	0.259877	0.310795	0.426658	0.478925
66.4	0.25897	0.313783	0.426136	0.480142
66.6	0.261562	0.313237	0.428361	0.478925
66.8	0.259502	0.312835	0.428694	0.481025
67	0.261616	0.312451	0.429098	0.483443
67.2	0.262377	0.313055	0.428048	0.48495
67.4	0.262583	0.311177	0.429253	0.484688
67.6	0.260975	0.310976	0.428637	0.484963
67.8	0.261712	0.312011	0.429223	0.4841
68	0.260336	0.311468	0.428443	0.484241
68.2	0.260193	0.308989	0.428122	0.482194
68.4	0.258263	0.309695	0.428033	0.482366
68.6	0.259817	0.310031	0.428258	0.483014
68.8	0.259343	0.310655	0.427731	0.483034
69	0.257779	0.309706	0.42923	0.482927
69.2	0.258282	0.311304	0.430418	0.482775
69.4	0.260169	0.310261	0.428533	0.483164
69.6	0.261093	0.309223	0.428619	0.48038
69.8	0.260776	0.308808	0.428431	0.481714
70	0.261197	0.309903	0.426677	0.482046
70.2	0.262458	0.310549	0.423855	0.482441
70.4	0.263772	0.31065	0.425726	0.482067
70.6	0.261933	0.308503	0.423893	0.48345
70.8	0.262865	0.307951	0.424781	0.480758
71	0.263678	0.308605	0.424547	0.478716
71.2	0.260293	0.306627	0.428026	0.480094
71.4	0.260993	0.307437	0.428543	0.479586
71.6	0.260263	0.310533	0.431265	0.479159
71.8	0.261092	0.310775	0.428912	0.478534
72	0.261501	0.309715	0.432007	0.48026
72.2	0.26241	0.310103	0.431727	0.480127
72.4	0.260553	0.311117	0.430622	0.480625
72.6	0.260485	0.310679	0.429864	0.481766
72.8	0.258335	0.310957	0.431898	0.485472
73	0.258937	0.310764	0.430435	0.484682
73.2	0.259765	0.310835	0.428467	0.483079
73.4	0.259817	0.309621	0.429986	0.480803
73.6	0.26153	0.30914	0.430976	0.480611
73.8	0.263183	0.307858	0.430599	0.478588
74	0.263115	0.309171	0.430648	0.478022
74.2	0.261568	0.309202	0.431017	0.479022
74.4	0.262654	0.308094	0.430256	0.480923
74.6	0.26025	0.310004	0.426606	0.482651
74.8	0.260431	0.312054	0.427978	0.48318
75	0.260149	0.309592	0.427648	0.485496
75.2	0.262364	0.308288	0.427016	0.485164
75.4	0.261694	0.30858	0.427701	0.485242
75.6	0.264242	0.305922	0.430407	0.4847
75.8	0.263216	0.30447	0.429501	0.485391
76	0.26157	0.305976	0.428956	0.48501
76.2	0.259831	0.308022	0.430236	0.484311
76.4	0.259981	0.31125	0.430005	0.485202
76.6	0.259713	0.310469	0.4307	0.484762
76.8	0.260829	0.312172	0.431134	0.484317
77	0.260931	0.31443	0.431674	0.481585
77.2	0.260709	0.313905	0.432403	0.482017
77.4	0.260786	0.311049	0.431221	0.481708
77.6	0.260645	0.312501	0.42919	0.48192
77.8	0.261018	0.311576	0.429216	0.481537
78	0.262129	0.309101	0.431897	0.484373
78.2	0.260001	0.309551	0.431247	0.482971
78.4	0.259394	0.309986	0.432625	0.48333
78.6	0.256805	0.310022	0.433545	0.48125
78.8	0.254865	0.309163	0.434291	0.482219
79	0.256908	0.309126	0.431389	0.479956
79.2	0.259071	0.309576	0.431962	0.482822
79.4	0.260092	0.308391	0.431804	0.482123
79.6	0.261093	0.309201	0.432381	0.4841
79.8	0.262141	0.309224	0.432046	0.48173
80	0.260895	0.310705	0.431883	0.483101
80.2	0.259768	0.310357	0.433213	0.482383
80.4	0.259081	0.312588	0.433505	0.483115
80.6	0.260954	0.312618	0.433719	0.481013
80.8	0.26125	0.314031	0.432898	0.483014
81	0.261078	0.312281	0.43365	0.48177
81.2	0.263616	0.311574	0.432443	0.481746
81.4	0.262065	0.311213	0.431462	0.481413
81.6	0.2629	0.311476	0.430434	0.481506
81.8	0.262439	0.30916	0.431033	0.482355
82	0.263118	0.308997	0.430356	0.482091
82.2	0.263324	0.309079	0.430051	0.482308
82.4	0.265642	0.30947	0.43101	0.481215
82.6	0.263729	0.309167	0.431254	0.483027
82.8	0.265017	0.310048	0.431171	0.482946
83	0.26278	0.311075	0.43276	0.483874
83.2	0.262332	0.310081	0.433032	0.482974
83.4	0.260331	0.308595	0.432717	0.484233
83.6	0.259504	0.310065	0.431395	0.485109
83.8	0.257524	0.309694	0.428553	0.485014
84	0.259607	0.311182	0.426548	0.483937
84.2	0.260078	0.313486	0.426486	0.485451
84.4	0.261243	0.313432	0.426837	0.486376
84.6	0.263966	0.310704	0.429046	0.483878
84.8	0.264047	0.311358	0.431027	0.482912
85	0.264416	0.310383	0.43116	0.483125
85.2	0.262667	0.311407	0.431217	0.483245
85.4	0.263395	0.312195	0.430017	0.482543
85.6	0.262529	0.313848	0.431555	0.484223
85.8	0.262416	0.315028	0.433262	0.484316
86	0.263702	0.313814	0.434977	0.48564
86.2	0.263337	0.312729	0.435513	0.485882
86.4	0.262265	0.31337	0.438135	0.484629
86.6	0.26235	0.31262	0.437097	0.484144
86.8	0.262852	0.312605	0.435913	0.483399
87	0.260498	0.312378	0.436788	0.482171
87.2	0.259942	0.311444	0.43699	0.480971
87.4	0.260315	0.310584	0.435307	0.482191
87.6	0.260489	0.310481	0.434229	0.480591
87.8	0.261502	0.310766	0.435211	0.48144
88	0.261188	0.310318	0.432045	0.482068
88.2	0.262113	0.311449	0.431167	0.481204
88.4	0.262072	0.312368	0.431319	0.482287
88.6	0.261557	0.312605	0.432678	0.483604
88.8	0.259547	0.312793	0.432356	0.481636
89	0.260342	0.314698	0.435228	0.482082
89.2	0.260624	0.314029	0.434024	0.486129
89.4	0.260438	0.312646	0.43397	0.484855
89.6	0.261495	0.312343	0.432098	0.484331
89.8	0.26264	0.310582	0.431282	0.48579
90	0.260401	0.31062	0.43012	0.484355
90.2	0.260447	0.311665	0.429967	0.483249
90.4	0.260571	0.311979	0.430196	0.483328
90.6	0.258333	0.312634	0.431229	0.486943
90.8	0.25737	0.312308	0.431389	0.487182
91	0.258777	0.312737	0.433072	0.488073
91.2	0.259135	0.311642	0.433536	0.486633
91.4	0.258912	0.313432	0.433838	0.488543
91.6	0.258686	0.312823	0.43371	0.48508
91.8	0.258609	0.314333	0.43279	0.486033
92	0.260042	0.314249	0.43175	0.486134
92.2	0.261847	0.314653	0.433363	0.486841
92.4	0.260406	0.3127	0.432937	0.483511
92.6	0.261709	0.313302	0.432298	0.482542
92.8	0.264539	0.314824	0.43286	0.483361
93	0.263692	0.314314	0.433085	0.481806
93.2	0.261121	0.312497	0.430732	0.480837
93.4	0.263429	0.316128	0.43135	0.482083
93.6	0.263671	0.315943	0.431048	0.481408
93.8	0.262001	0.31337	0.432009	0.478783
94	0.262786	0.312321	0.431138	0.479438
94.2	0.262183	0.31468	0.432049	0.481162
94.4	0.260539	0.312549	0.431724	0.482074
94.6	0.260928	0.311775	0.433254	0.48397
94.8	0.259336	0.312954	0.433217	0.483785
95	0.257771	0.314153	0.434936	0.485806
95.2	0.258484	0.31255	0.435698	0.48282
95.4	0.259036	0.311657	0.436856	0.480714
95.6	0.256689	0.31319	0.434732	0.480928
95.8	0.258371	0.313131	0.434733	0.484665
96	0.258862	0.312864	0.434564	0.482162
96.2	0.259022	0.313404	0.434074	0.483319
96.4	0.258081	0.313954	0.433719	0.483147
96.6	0.259982	0.312973	0.434847	0.481401
96.8	0.259382	0.312187	0.434141	0.480074
97	0.258134	0.312525	0.432696	0.479366
97.2	0.260093	0.314323	0.433006	0.479455
97.4	0.260838	0.314227	0.432356	0.480995
97.6	0.261087	0.313796	0.432252	0.483154
97.8	0.26073	0.314766	0.434979	0.482518
98	0.260485	0.314902	0.434811	0.483271
98.2	0.260115	0.313389	0.434335	0.484063
98.4	0.261129	0.312683	0.433001	0.484668
98.6	0.260155	0.313279	0.433348	0.483762
98.8	0.261292	0.312275	0.432422	0.483822
99	0.262443	0.310503	0.433882	0.48492
99.2	0.262129	0.310684	0.4342	0.485263
99.4	0.260468	0.311777	0.435306	0.48366
99.6	0.260639	0.312275	0.43625	0.484258
99.8	0.259889	0.313454	0.43541	0.484046
100	0.260508	0.316184	0.434245	0.484306
100.2	0.259595	0.315124	0.434947	0.484739
100.4	0.261279	0.314854	0.437142	0.485057
100.6	0.263401	0.314477	0.434935	0.484884
100.8	0.264446	0.313675	0.433717	0.484186
101	0.264315	0.31247	0.434505	0.483404
101.2	0.264833	0.312553	0.433666	0.481919
101.4	0.263823	0.313068	0.431401	0.482042
101.6	0.263041	0.313908	0.432053	0.481424
101.8	0.263331	0.314214	0.434035	0.482015
102	0.263112	0.314679	0.433715	0.481917
102.2	0.264605	0.316944	0.434638	0.481935
102.4	0.265268	0.314931	0.433466	0.482809
102.6	0.264852	0.313993	0.432841	0.483281
102.8	0.262501	0.313469	0.433186	0.483091
103	0.261006	0.312648	0.433395	0.484422
103.2	0.260746	0.311601	0.434067	0.485442
103.4	0.259135	0.311866	0.4342	0.485977
103.6	0.258903	0.310597	0.434779	0.486273
103.8	0.259213	0.310879	0.433715	0.486718
104	0.261362	0.312036	0.435343	0.487427
104.2	0.259089	0.3116	0.435476	0.486801
104.4	0.262407	0.311369	0.437854	0.485637
104.6	0.261869	0.312275	0.436864	0.484971
104.8	0.263621	0.313984	0.438255	0.485014
105	0.264428	0.313783	0.436867	0.483052
105.2	0.265667	0.314434	0.436139	0.482932
105.4	0.263729	0.31609	0.436481	0.482022
105.6	0.26401	0.315686	0.437455	0.483487
105.8	0.265441	0.313896	0.434229	0.481767
106	0.264458	0.312306	0.433642	0.481523
106.2	0.26492	0.312661	0.433488	0.480769
106.4	0.266763	0.313328	0.43214	0.480202
106.6	0.266548	0.313604	0.433158	0.480493
106.8	0.263458	0.313738	0.435457	0.482859
107	0.263219	0.314543	0.433746	0.4824
107.2	0.261295	0.314852	0.435812	0.483048
107.4	0.261375	0.313871	0.436617	0.483164
107.6	0.260272	0.314818	0.436248	0.482437
107.8	0.261223	0.314878	0.436911	0.482979
108	0.26066	0.315051	0.439375	0.482797
108.2	0.261089	0.31336	0.437247	0.483012
108.4	0.258684	0.312161	0.437052	0.484376
108.6	0.258647	0.31229	0.436533	0.484893
108.8	0.259774	0.311665	0.43668	0.483565
109	0.259798	0.311395	0.435601	0.486093
109.2	0.262424	0.3117	0.435218	0.486974
109.4	0.264183	0.314013	0.433346	0.487577
109.6	0.266055	0.313106	0.431503	0.486934
109.8	0.265765	0.313812	0.430854	0.487347
110	0.266166	0.314294	0.431037	0.484879
110.2	0.265304	0.314821	0.431389	0.483892
110.4	0.264512	0.312957	0.433044	0.483048
110.6	0.262467	0.313521	0.434758	0.484869
110.8	0.263792	0.312873	0.433302	0.484747
111	0.264135	0.311578	0.433847	0.486555
111.2	0.26329	0.310899	0.434756	0.487137
111.4	0.264386	0.310738	0.435731	0.488462
111.6	0.266473	0.311577	0.436625	0.485816
111.8	0.264538	0.311866	0.438168	0.487924
112	0.2659	0.311821	0.437629	0.488227
112.2	0.266758	0.312615	0.438085	0.487896
112.4	0.266504	0.312711	0.437706	0.486825
112.6	0.26751	0.311155	0.437103	0.487122
112.8	0.268749	0.310384	0.43691	0.483793
113	0.26719	0.312255	0.436939	0.483363
113.2	0.266307	0.312667	0.436065	0.48154
113.4	0.265313	0.314531	0.435941	0.482302
113.6	0.263363	0.314841	0.436197	0.483214
113.8	0.261695	0.316097	0.435208	0.485079
114	0.263209	0.314977	0.437557	0.484579
114.2	0.262303	0.314669	0.43832	0.48393
114.4	0.2626	0.313798	0.437086	0.483106
114.6	0.262261	0.315337	0.436997	0.48323
114.8	0.264159	0.314113	0.438207	0.48126
115	0.262493	0.316541	0.434269	0.480109
115.2	0.262999	0.314965	0.435794	0.480906
115.4	0.26197	0.313157	0.437238	0.481664
115.6	0.2615	0.311387	0.437661	0.480988
115.8	0.262121	0.311304	0.435345	0.482411
116	0.262296	0.309256	0.436501	0.482735
116.2	0.260297	0.31208	0.43349	0.482669
116.4	0.260819	0.313424	0.431758	0.482122
116.6	0.261606	0.314353	0.430594	0.4827
116.8	0.260843	0.315045	0.432755	0.482854
117	0.260622	0.31576	0.433274	0.483538
117.2	0.26216	0.313374	0.434229	0.482942
117.4	0.262461	0.312558	0.435214	0.483154
117.6	0.262103	0.310808	0.437368	0.483922
117.8	0.261885	0.310308	0.437306	0.486167
118	0.26057	0.309175	0.437414	0.486276
118.2	0.262356	0.309443	0.437871	0.486973
118.4	0.261928	0.309352	0.438126	0.487333
118.6	0.261426	0.310822	0.437973	0.487097
118.8	0.260757	0.311018	0.437982	0.484434
119	0.262257	0.312352	0.437928	0.487205
119.2	0.258867	0.313847	0.437676	0.487905
119.4	0.25895	0.312822	0.437783	0.487036
119.6	0.257517	0.313561	0.437325	0.48742
119.8	0.257004	0.315206	0.437344	0.486377
120	0.258185	0.312729	0.43754	0.483893
120.2	0.260389	0.311258	0.437229	0.484974
120.4	0.259016	0.314164	0.437347	0.486664
120.6	0.262096	0.313914	0.437518	0.487075
120.8	0.260691	0.312319	0.437756	0.488041
121	0.258169	0.31363	0.438032	0.489935
121.2	0.257225	0.31505	0.438242	0.488896
121.4	0.260163	0.312941	0.438339	0.488546
121.6	0.256278	0.312845	0.438354	0.48736
121.8	0.259423	0.31273	0.437682	0.487472
122	0.261623	0.312402	0.437745	0.485954
122.2	0.261993	0.312016	0.438828	0.487296
122.4	0.261506	0.313245	0.439242	0.48727
122.6	0.264656	0.312444	0.436682	0.486862
122.8	0.261767	0.312171	0.437731	0.488324
123	0.260468	0.312631	0.437517	0.489396
123.2	0.258682	0.31187	0.435789	0.489122
123.4	0.258029	0.310695	0.434943	0.488357
123.6	0.255423	0.311251	0.436548	0.489075
123.8	0.25471	0.313085	0.436126	0.48785
124	0.257101	0.31265	0.435721	0.487152
124.2	0.260098	0.314438	0.436803	0.486606
124.4	0.260238	0.315546	0.435831	0.487058
124.6	0.260587	0.314806	0.436047	0.488703
124.8	0.261646	0.313218	0.435696	0.489507
125	0.259484	0.313534	0.435717	0.490246
125.2	0.259143	0.311331	0.4349	0.489991
125.4	0.25703	0.310416	0.436501	0.491129
125.6	0.256877	0.311406	0.436815	0.489528
125.8	0.257792	0.311399	0.437001	0.489034
126	0.259642	0.310906	0.437815	0.488309
126.2	0.256972	0.311716	0.43855	0.488329
126.4	0.2583	0.312906	0.43719	0.487015
126.6	0.260354	0.313581	0.435656	0.486676
126.8	0.259792	0.314783	0.43555	0.486364
127	0.256926	0.314271	0.433546	0.485519
127.2	0.261622	0.314561	0.43238	0.48532
127.4	0.261911	0.313594	0.433426	0.486925
127.6	0.261105	0.312852	0.434785	0.487627
127.8	0.264381	0.311435	0.43588	0.488405
128	0.265662	0.313139	0.437148	0.488816
128.2	0.260927	0.312809	0.436947	0.489569
128.4	0.262616	0.312308	0.43768	0.489015
128.6	0.264914	0.313355	0.436937	0.489481
128.8	0.261033	0.31312	0.435671	0.487241
129	0.260647	0.313153	0.437472	0.48779
129.2	0.262521	0.313038	0.439531	0.487977
129.4	0.261963	0.313076	0.438007	0.485685
129.6	0.260943	0.310383	0.439288	0.487081
129.8	0.262959	0.309746	0.440635	0.488705
130	0.263929	0.309674	0.438655	0.489363
130.2	0.26525	0.308586	0.436779	0.487886
130.4	0.261937	0.309347	0.435785	0.488477
130.6	0.260983	0.311036	0.434096	0.486185
130.8	0.260686	0.311648	0.434213	0.484723
131	0.25902	0.310782	0.43582	0.483056
131.2	0.258629	0.310674	0.43586	0.4826
131.4	0.261161	0.310036	0.43638	0.483205
131.6	0.26146	0.311049	0.435864	0.484885
131.8	0.262545	0.30906	0.436758	0.486069
132	0.261128	0.309709	0.435043	0.487045
132.2	0.259457	0.311766	0.437063	0.487897
132.4	0.260296	0.311662	0.437829	0.487382
132.6	0.261995	0.309997	0.440269	0.485308
132.8	0.26066	0.313161	0.437896	0.485243
133	0.262739	0.312598	0.439557	0.484997
133.2	0.263777	0.312783	0.43935	0.485051
133.4	0.2609	0.313354	0.437457	0.485409
133.6	0.258618	0.313939	0.436938	0.485988
133.8	0.25862	0.314165	0.438321	0.485777
134	0.258487	0.31514	0.436226	0.485071
134.2	0.256895	0.314564	0.435991	0.487337
134.4	0.260019	0.313467	0.43804	0.487563
134.6	0.261353	0.313976	0.437629	0.486332
134.8	0.262267	0.311982	0.437717	0.489057
135	0.261258	0.31157	0.439785	0.48797
135.2	0.263197	0.310946	0.440785	0.487423
135.4	0.260818	0.311029	0.438727	0.487172
135.6	0.261556	0.309866	0.438076	0.488431
135.8	0.260467	0.308385	0.437166	0.485675
136	0.2592	0.306903	0.436595	0.488002
136.2	0.260384	0.306399	0.437236	0.486729
136.4	0.260392	0.307958	0.438899	0.488905
136.6	0.258799	0.307612	0.439275	0.489549
136.8	0.260834	0.310726	0.439946	0.490373
137	0.263261	0.312446	0.439472	0.489812
137.2	0.260758	0.312464	0.437841	0.490337
137.4	0.262765	0.310848	0.437724	0.487654
137.6	0.264002	0.311287	0.438896	0.487246
137.8	0.263831	0.310025	0.437917	0.486886
138	0.265818	0.310135	0.439246	0.487594
138.2	0.26724	0.311234	0.439001	0.487426
138.4	0.265304	0.312286	0.43929	0.487717
138.6	0.265499	0.312331	0.440543	0.489036
138.8	0.263669	0.312178	0.440003	0.488069
139	0.260718	0.310753	0.438868	0.486777
139.2	0.261987	0.310856	0.442117	0.486586
139.4	0.261624	0.310281	0.443218	0.488267
139.6	0.260422	0.310702	0.440989	0.487315
139.8	0.260617	0.311729	0.441221	0.488635
140	0.263133	0.312885	0.440769	0.489612
140.2	0.261428	0.312031	0.43939	0.490116
140.4	0.262001	0.311658	0.438264	0.488524
140.6	0.261212	0.312327	0.436735	0.488277
140.8	0.262803	0.310429	0.4372	0.487318
141	0.261201	0.309901	0.43754	0.486675
141.2	0.261275	0.308603	0.436656	0.487071
141.4	0.261993	0.309302	0.436477	0.487605
141.6	0.262142	0.308495	0.439171	0.486395
141.8	0.263486	0.30814	0.440625	0.486007
142	0.265081	0.308335	0.44172	0.489448
142.2	0.26492	0.310551	0.44114	0.488488
142.4	0.265915	0.310975	0.440919	0.486994
142.6	0.267364	0.311882	0.441388	0.48898
142.8	0.264303	0.31316	0.439231	0.488877
143	0.261877	0.31347	0.437669	0.486175
143.2	0.262428	0.313096	0.437836	0.487198
143.4	0.261989	0.313593	0.439518	0.489103
143.6	0.261728	0.312507	0.436115	0.485613
143.8	0.26264	0.312486	0.436509	0.487787
144	0.264478	0.313102	0.439258	0.489015
144.2	0.264124	0.31324	0.440119	0.486442
144.4	0.263847	0.311159	0.438603	0.486131
144.6	0.262317	0.310732	0.441761	0.486956
144.8	0.263157	0.310451	0.441949	0.488387
145	0.261735	0.310875	0.438659	0.489056
145.2	0.261982	0.31077	0.437926	0.489245
145.4	0.260657	0.311817	0.437855	0.488656
145.6	0.262816	0.313728	0.435024	0.489225
145.8	0.262888	0.313307	0.435666	0.486015
146	0.261851	0.312563	0.437345	0.484359
146.2	0.262591	0.312651	0.436829	0.487231
146.4	0.265742	0.311976	0.437933	0.488414
146.6	0.26608	0.312235	0.440001	0.489611
146.8	0.265606	0.311855	0.439135	0.490978
147	0.266417	0.31158	0.439398	0.491437
147.2	0.266311	0.309912	0.441008	0.490561
147.4	0.262968	0.311993	0.439422	0.491151
147.6	0.261214	0.312384	0.437707	0.488694
147.8	0.261128	0.313132	0.438223	0.488627
148	0.26275	0.311151	0.437529	0.488537
148.2	0.262163	0.312069	0.435785	0.488302
148.4	0.264387	0.311167	0.436655	0.487503
148.6	0.264276	0.310157	0.438449	0.490213
148.8	0.264296	0.311018	0.438636	0.489936
149	0.264272	0.313159	0.439289	0.489336
149.2	0.262498	0.31269	0.441036	0.488998
149.4	0.262201	0.312978	0.440918	0.488192
149.6	0.264687	0.311549	0.440717	0.487833
149.8	0.264302	0.311044	0.440686	0.488421
150	0.27646	0.319311	0.446258	0.551127
150.2	0.270055	0.312685	0.428225	0.490241
150.4	0.261173	0.305772	0.411015	0.469196
150.6	0.254638	0.291019	0.392717	0.448653
150.8	0.255513	0.28483	0.383026	0.431445
151	0.2484	0.27496	0.366916	0.413235
151.2	0.244292	0.265032	0.352221	0.395637
151.4	0.239824	0.256609	0.341054	0.377981
151.6	0.235265	0.247868	0.329846	0.363372
151.8	0.231039	0.240088	0.31846	0.348906
152	0.227329	0.233571	0.308445	0.336895
152.2	0.222248	0.225916	0.299578	0.322487
152.4	0.218836	0.217817	0.289103	0.311918
152.6	0.214906	0.21302	0.282196	0.301049
152.8	0.210011	0.205691	0.275079	0.290565
153	0.205428	0.199267	0.268377	0.281902
153.2	0.201145	0.194821	0.262544	0.274448
153.4	0.198554	0.190014	0.256595	0.264999
153.6	0.195285	0.184864	0.249303	0.256143
153.8	0.192314	0.180714	0.242586	0.249532
154	0.18932	0.176417	0.237252	0.241683
154.2	0.187414	0.172321	0.231521	0.23435
154.4	0.183902	0.168694	0.226355	0.229526
154.6	0.181505	0.164308	0.221945	0.223725
154.8	0.178019	0.160458	0.21744	0.218412
155	0.177341	0.157668	0.212942	0.212246
155.2	0.17526	0.152599	0.210087	0.207435
155.4	0.17368	0.150173	0.207885	0.201535
155.6	0.170795	0.148598	0.204433	0.197277
155.8	0.168613	0.146281	0.201139	0.192851
156	0.165014	0.142548	0.197902	0.189331
156.2	0.162123	0.142652	0.194019	0.186448
156.4	0.159702	0.139089	0.189527	0.183358
156.6	0.15826	0.134842	0.186517	0.17984
156.8	0.156557	0.132969	0.183243	0.176085
157	0.15684	0.131837	0.180853	0.172968
157.2	0.155792	0.128767	0.177783	0.168832
157.4	0.154593	0.126235	0.176232	0.166244
157.6	0.152669	0.124876	0.173654	0.163128
157.8	0.151647	0.121446	0.171828	0.160491
158	0.148065	0.118897	0.16927	0.15687
158.2	0.14785	0.117121	0.168359	0.152944
158.4	0.145868	0.114969	0.165515	0.149871
158.6	0.145357	0.113964	0.162902	0.147585
158.8	0.145914	0.11277	0.160608	0.145524
159	0.145143	0.111305	0.158804	0.142406
159.2	0.143211	0.108421	0.156697	0.142885
159.4	0.14233	0.107282	0.155128	0.140496
159.6	0.141021	0.105594	0.154244	0.138647
159.8	0.138448	0.105426	0.153569	0.136169
160	0.137594	0.103867	0.152111	0.136495
160.2	0.135588	0.102566	0.150123	0.133681
160.4	0.135631	0.100716	0.149081	0.131122
160.6	0.134868	0.0992133	0.147676	0.129107
160.8	0.133948	0.0969354	0.145301	0.127559
161	0.133537	0.0972846	0.143583	0.124915
161.2	0.133633	0.0963982	0.142339	0.122741
161.4	0.131128	0.0958379	0.140253	0.121058
161.6	0.130069	0.0944454	0.139879	0.119523
161.8	0.129178	0.0925033	0.138997	0.11791
162	0.128694	0.0905954	0.136984	0.116868
162.2	0.128238	0.0894654	0.135196	0.115069
162.4	0.126657	0.0875911	0.134201	0.114488
162.6	0.125294	0.0872653	0.132529	0.113223
162.8	0.124481	0.0868547	0.131242	0.112049
163	0.122907	0.0848564	0.131389	0.110172
163.2	0.120962	0.0843823	0.129676	0.10927
163.4	0.120749	0.0853706	0.128799	0.108597
163.6	0.120104	0.0844293	0.127713	0.108419
163.8	0.119028	0.0840051	0.126681	0.10611
164	0.11848	0.0838805	0.123889	0.105322
164.2	0.118088	0.0826521	0.123975	0.103732
164.4	0.118639	0.0814483	0.123308	0.101875
164.6	0.118325	0.0798023	0.121367	0.098957
164.8	0.118224	0.0782992	0.121618	0.09888
165	0.117748	0.0771339	0.121886	0.097184
165.2	0.117667	0.0764218	0.121067	0.0969925
165.4	0.116858	0.075495	0.119312	0.0963295
165.6	0.116416	0.0745921	0.118129	0.0952565
165.8	0.114826	0.0739323	0.11631	0.0928175
166	0.11387	0.0743327	0.116122	0.0917625
166.2	0.114189	0.0727909	0.114801	0.0907905
166.4	0.11335	0.0724499	0.115638	0.089796
166.6	0.113501	0.0723494	0.116177	0.0892905
166.8	0.114426	0.072418	0.115123	0.0896225
167	0.114038	0.0705509	0.113173	0.088981
167.2	0.112516	0.07191	0.112428	0.0867665
167.4	0.11304	0.0699939	0.110328	0.085693
167.6	0.111863	0.0693075	0.109718	0.0843755
167.8	0.109971	0.0671575	0.109638	0.08341
168	0.109424	0.0670425	0.109001	0.0822435
168.2	0.109623	0.0656311	0.106844	0.081837
168.4	0.108199	0.0655041	0.1063	0.0815805
168.6	0.108147	0.0649798	0.105881	0.0813585
168.8	0.108313	0.0648458	0.105251	0.0800755
169	0.107965	0.0645607	0.1044	0.0780045
169.2	0.10637	0.0625086	0.105606	0.0778945
169.4	0.10581	0.0619106	0.104634	0.0777805
169.6	0.105128	0.0607143	0.103667	0.077561
169.8	0.105271	0.0608855	0.102214	0.077509
170	0.104963	0.0596697	0.102618	0.078899
170.2	0.104658	0.0609955	0.100581	0.0781965
170.4	0.104525	0.0609406	0.100865	0.0753475
170.6	0.105135	0.0608542	0.0998393	0.073992
170.8	0.104304	0.0599566	0.0996142	0.074265
171	0.10356	0.0599848	0.098836	0.073518
171.2	0.102954	0.0587652	0.0991513	0.0720535
171.4	0.102695	0.0580351	0.0985464	0.0725215
171.6	0.100804	0.0574971	0.0972094	0.0713905
171.8	0.100745	0.0571714	0.0962656	0.0689395
172	0.101079	0.0566361	0.0949947	0.0683475
172.2	0.100836	0.0567945	0.0952472	0.0692205
172.4	0.101446	0.0562551	0.0934855	0.0669985
172.6	0.101468	0.0562553	0.0937221	0.0677135
172.8	0.100975	0.0552633	0.093983	0.066841
173	0.100675	0.055346	0.0937236	0.0659405
173.2	0.0997837	0.0550029	0.0922075	0.0646835
173.4	0.0981778	0.0551393	0.0921593	0.064911
173.6	0.0976151	0.0545238	0.0927709	0.063671
173.8	0.097033	0.0536709	0.0916141	0.063723
174	0.0964869	0.0537081	0.0910564	0.0610575
174.2	0.0963816	0.0528818	0.0912936	0.0604615
174.4	0.0962098	0.0520615	0.0917519	0.0598385
174.6	0.095419	0.0525678	0.090188	0.059627
174.8	0.0945688	0.0533959	0.0905681	0.0591425
175	0.0943633	0.0521215	0.0903087	0.0607925
175.2	0.0945676	0.0515482	0.0883367	0.0610915
175.4	0.09492	0.0510664	0.0876176	0.060398
175.6	0.0952144	0.0502733	0.0870131	0.0593325
175.8	0.096873	0.0503251	0.0854059	0.058754
176	0.0957967	0.0495111	0.0851682	0.058489
176.2	0.0957672	0.0494368	0.0846133	0.058056
176.4	0.0946052	0.0501543	0.0840028	0.058065
176.6	0.0942884	0.0495649	0.0838828	0.0579815
176.8	0.0925219	0.0481577	0.0838934	0.057983
177	0.0938317	0.0483839	0.0823987	0.0564195
177.2	0.0929503	0.0468056	0.0829776	0.0553415
177.4	0.0932061	0.0446915	0.0812884	0.0545915
177.6	0.0935197	0.0441013	0.0803231	0.054198
177.8	0.0939179	0.0437516	0.0800666	0.0529175
178	0.0925895	0.0431302	0.0801001	0.053102
178.2	0.0919004	0.043694	0.0788989	0.0528675
178.4	0.0908682	0.0446905	0.0786031	0.053258
178.6	0.0909883	0.0446623	0.0774219	0.0534065
178.8	0.0900096	0.0442845	0.0763671	0.05293
179	0.0899913	0.045209	0.0767159	0.0530415
179.2	0.0906003	0.0429669	0.0767577	0.0521265
179.4	0.0918692	0.0417897	0.0774399	0.05137
179.6	0.0913947	0.0401069	0.0780163	0.0498025
179.8	0.0920491	0.0400725	0.0777521	0.0496925
180	0.0926158	0.0377675	0.0770685	0.049539
180.2	0.0918246	0.0390511	0.0766249	0.0504595
180.4	0.0924867	0.0374818	0.0754242	0.04973
180.6	0.0909391	0.0375127	0.0747239	0.0509205
180.8	0.0908467	0.0367051	0.0746388	0.050143
181	0.0899869	0.0355219	0.0739601	0.0495375
181.2	0.0890988	0.0353426	0.0729553	0.0488335
181.4	0.0876837	0.0364502	0.0724503	0.049229
181.6	0.0878373	0.0362111	0.0713433	0.0478945
181.8	0.0879996	0.0357284	0.0698214	0.048681
182	0.0865743	0.0374399	0.0697247	0.048874
182.2	0.0887368	0.0367961	0.069116	0.0471995
182.4	0.0882614	0.0362918	0.0690226	0.0460475
182.6	0.0881514	0.0373695	0.0694422	0.045868
182.8	0.086557	0.0368974	0.0709528	0.04592
183	0.0870215	0.0366023	0.0705756	0.045384
183.2	0.0850705	0.0368667	0.0712737	0.045547
183.4	0.084531	0.0354284	0.0714826	0.045462
183.6	0.0844266	0.0337552	0.0704538	0.04437
183.8	0.0845914	0.0346389	0.0695598	0.043682
184	0.084733	0.0331079	0.068044	0.043451
184.2	0.0846945	0.0320174	0.0671327	0.042862
184.4	0.0848289	0.0339391	0.0669962	0.042162
184.6	0.0844442	0.034103	0.0678754	0.042204
184.8	0.0843989	0.0322072	0.067626	0.0418625
185	0.0827629	0.0330077	0.0683429	0.0401715
185.2	0.0836553	0.0332277	0.0677659	0.040251
185.4	0.0835214	0.0313302	0.0659709	0.0406925
185.6	0.0836716	0.0303079	0.0645795	0.039762
185.8	0.0838635	0.0307159	0.0628425	0.039254
186	0.0843888	0.0291143	0.0626927	0.03867
186.2	0.082163	0.0279579	0.0618932	0.037122
186.4	0.081246	0.0274374	0.06296	0.0364785
186.6	0.0808134	0.0280331	0.0637104	0.036308
186.8	0.0801842	0.0274393	0.0639535	0.035499
187	0.0813878	0.0278937	0.0618226	0.0360415
187.2	0.081696	0.0287104	0.0622038	0.0366865
187.4	0.0826386	0.0295268	0.0601373	0.036261
187.6	0.0825486	0.029066	0.0591387	0.0366355
187.8	0.0833664	0.0298893	0.0587005	0.036949
188	0.0822944	0.0299709	0.0589236	0.036611
188.2	0.0818492	0.0296325	0.0590569	0.0363005
188.4	0.0812171	0.0289527	0.0597992	0.035979
188.6	0.0811876	0.0292034	0.0603401	0.0353805
188.8	0.0802433	0.0296603	0.060378	0.0343195
189	0.0803864	0.030271	0.060704	0.033982
189.2	0.0809283	0.0296169	0.0604026	0.034275
189.4	0.0808931	0.0302208	0.0601804	0.0342195
189.6	0.0803506	0.0301058	0.0593927	0.0333045
189.8	0.0802852	0.0293068	0.0594417	0.0332175
190	0.0802731	0.0281282	0.0588279	0.0324365
190.2	0.080302	0.0278265	0.0588442	0.0330525
190.4	0.0809531	0.0281449	0.0585117	0.032658
190.6	0.0815888	0.0275333	0.0573017	0.032727
190.8	0.0820364	0.0277063	0.0569999	0.0333035
191	0.0812005	0.0275382	0.0567742	0.0332975
191.2	0.0807191	0.0270856	0.0570731	0.0322635
191.4	0.0794148	0.0263273	0.0560991	0.031816
191.6	0.0790166	0.0265474	0.0565334	0.031956
191.8	0.0777661	0.0258215	0.0550343	0.031848
192	0.0777137	0.0255048	0.0546393	0.0323685
192.2	0.0756539	0.0255005	0.0529318	0.031665
192.4	0.0774266	0.0257988	0.0526169	0.0330365
192.6	0.0764547	0.0259437	0.0526677	0.032831
192.8	0.0767587	0.0253574	0.0529494	0.0322405
193	0.0763436	0.024133	0.0539662	0.0321725
193.2	0.0784282	0.0243456	0.0539429	0.0322695
193.4	0.0770918	0.0238995	0.054056	0.032209
193.6	0.0785283	0.022291	0.0553351	0.031965
193.8	0.0785873	0.0235709	0.0548106	0.031832
194	0.0792005	0.0247858	0.053092	0.031728
194.2	0.0789987	0.0253513	0.0535886	0.0324395
194.4	0.0779986	0.0253264	0.053345	0.0312655
194.6	0.0768984	0.0257278	0.0512698	0.030921
194.8	0.0754906	0.0252117	0.0517261	0.0303485
195	0.0765755	0.0251625	0.0512982	0.029308
195.2	0.0754304	0.023892	0.0509851	0.0298445
195.4	0.0754501	0.0242432	0.0510357	0.0300485
195.6	0.0735228	0.0241242	0.051525	0.0305655
195.8	0.0742329	0.0241919	0.0516213	0.0318445
196	0.0722459	0.0249145	0.0520003	0.0324715
196.2	0.0728272	0.0251425	0.0517589	0.0304595
196.4	0.0742759	0.0245583	0.0513046	0.02976
196.6	0.0761318	0.0239617	0.0507885	0.030294
196.8	0.0770261	0.0236734	0.050252	0.02935
197	0.0780308	0.0230754	0.0509827	0.0300115
197.2	0.0767471	0.0231814	0.0498767	0.0303855
197.4	0.0745752	0.0229745	0.0499881	0.0305455
197.6	0.0740986	0.0235271	0.0504908	0.0298235
197.8	0.0732671	0.0229516	0.0510393	0.02905
198	0.0736562	0.022574	0.0497885	0.028191
198.2	0.0743504	0.0212557	0.0493395	0.0287575
198.4	0.0745212	0.0198181	0.0492216	0.0279745
198.6	0.0742198	0.0191291	0.0482064	0.0273135
198.8	0.073358	0.018785	0.0479021	0.0270315
199	0.0720301	0.0181024	0.0486373	0.0263355
199.2	0.0724856	0.0179032	0.0493964	0.0259515
199.4	0.073051	0.0181054	0.0494338	0.0265335
199.6	0.0738566	0.0185117	0.04911	0.02682
199.8	0.0746052	0.017647	0.0479125	0.026898
200	0.074017	0.0179615	0.0475989	0.0272765
200.2	0.0737889	0.0180061	0.0471213	0.027029
200.4	0.0733584	0.017361	0.0465441	0.0255125
200.6	0.0723149	0.0166538	0.0472282	0.024749
200.8	0.0722836	0.0172819	0.049149	0.024237
201	0.072752	0.0177488	0.048825	0.024189
201.2	0.0723093	0.0166551	0.0499124	0.0241085
201.4	0.0723759	0.0169438	0.0498246	0.025665
201.6	0.0717221	0.0168977	0.0493603	0.0253875
201.8	0.0712689	0.0169984	0.0480327	0.026031
202	0.0706663	0.0158235	0.0486795	0.025777
202.2	0.0703525	0.017293	0.0478376	0.025673
202.4	0.0695838	0.0167641	0.048117	0.024027
202.6	0.069374	0.0173321	0.0474809	0.023967
202.8	0.0698528	0.0177334	0.0472499	0.0240805
203	0.0701915	0.0174702	0.0456798	0.02426
203.2	0.0696018	0.0186277	0.0450502	0.0236655
203.4	0.0698534	0.0194045	0.0444695	0.023349
203.6	0.0699795	0.0189954	0.0440696	0.023567
203.8	0.0684954	0.0192325	0.0440251	0.0227935
204	0.0670206	0.0195362	0.0439276	0.022236
204.2	0.0681772	0.0171768	0.0434686	0.022928
204.4	0.0685691	0.0164694	0.0438274	0.0235235
204.6	0.0688229	0.0159807	0.0439742	0.0225445
204.8	0.0684956	0.015015	0.042431	0.022728
205	0.0684303	0.0147528	0.0439165	0.0221315
205.2	0.0674813	0.0151572	0.0439459	0.020841
205.4	0.0667845	0.0149902	0.0429354	0.0203815
205.6	0.0669156	0.0165247	0.042434	0.0205185
205.8	0.0677677	0.016373	0.0441378	0.0200395
206	0.0682181	0.0168807	0.0421667	0.0191545
206.2	0.0673153	0.0187211	0.0422786	0.0190265
206.4	0.0671408	0.0193122	0.043056	0.019195
206.6	0.0660429	0.0179981	0.0431931	0.018497
206.8	0.0657745	0.0184365	0.0430963	0.018592
207	0.0655011	0.0179807	0.0431016	0.0197935
207.2	0.0659612	0.016346	0.0426872	0.019554
207.4	0.0655269	0.0154554	0.0419808	0.020145
207.6	0.06645	0.0150688	0.0425951	0.019568
207.8	0.0659065	0.0137933	0.0418686	0.020011
208	0.0654699	0.0126225	0.041713	0.0195455
208.2	0.0652417	0.0125994	0.0409876	0.0193115
208.4	0.0649752	0.0137189	0.0415068	0.019401
208.6	0.0634999	0.013655	0.0393217	0.0208005
208.8	0.0635919	0.0148728	0.0392687	0.020339
209	0.0646408	0.0159466	0.0394776	0.019764
209.2	0.0646071	0.0160959	0.0408129	0.0191465
209.4	0.0655844	0.0150718	0.0400697	0.018042
209.6	0.0660998	0.015744	0.0399508	0.0170745
209.8	0.0656797	0.0142024	0.0395341	0.016628
210	0.065713	0.0141376	0.03976	0.0168425
210.2	0.0664593	0.0131981	0.0388406	0.0171615
210.4	0.0648562	0.0139465	0.0388843	0.0167475
210.6	0.065726	0.0129877	0.0395605	0.016583
210.8	0.0659715	0.0129543	0.0402104	0.0156015
211	0.0656394	0.012986	0.0393435	0.0155615
211.2	0.0650167	0.012317	0.0398509	0.0149265
211.4	0.0657411	0.0113752	0.039146	0.014518
211.6	0.0650166	0.0115612	0.0401192	0.0148515
211.8	0.0638748	0.0116817	0.0384675	0.015013
212	0.0639666	0.0106285	0.0383521	0.014889
212.2	0.0646389	0.01122	0.0380818	0.0163635
212.4	0.064283	0.0108895	0.0394798	0.016481
212.6	0.0642217	0.010858	0.0390998	0.016214
212.8	0.0645062	0.0122966	0.0400082	0.0160055
213	0.0639744	0.0126118	0.0398117	0.015866
213.2	0.0638633	0.0138568	0.0392304	0.014278
213.4	0.0635607	0.0141934	0.0375725	0.014005
213.6	0.0649251	0.0134972	0.0357759	0.0138075
213.8	0.0663126	0.0118456	0.0355598	0.013291
214	0.0668348	0.0111273	0.0364468	0.0126815
214.2	0.0667199	0.0111046	0.036854	0.013461
214.4	0.0677745	0.0104648	0.0384399	0.013552
214.6	0.0658198	0.0116039	0.0394162	0.0132355
214.8	0.0652823	0.0119746	0.0406008	0.0130605
215	0.0638217	0.0118502	0.0393651	0.0128985
215.2	0.0634671	0.0102655	0.03833	0.0129
215.4	0.0622816	0.0114921	0.0366278	0.013758
215.6	0.063126	0.0110688	0.0371631	0.0138545
215.8	0.0635565	0.0107088	0.0355064	0.014095
216	0.0640447	0.0107607	0.0364021	0.013985
216.2	0.0627711	0.0116846	0.0373513	0.0139415
216.4	0.0623671	0.0109634	0.0388927	0.0128455
216.6	0.0612608	0.0100481	0.0382893	0.01197
216.8	0.0602659	0.0104037	0.0383382	0.0113105
217	0.060048	0.0104349	0.0372059	0.010948
217.2	0.0599716	0.0097642	0.0355922	0.0100825
217.4	0.0609484	0.00947255	0.0346215	0.009101
217.6	0.0614785	0.0098415	0.034232	0.0099785
217.8	0.0621614	0.0104335	0.035335	0.0097335
218	0.0613866	0.00973955	0.0358235	0.0106225
218.2	0.0619126	0.0101629	0.0373605	0.010828
218.4	0.0628177	0.0089719	0.0363503	0.01207
218.6	0.0628011	0.00858185	0.0362161	0.0110695
218.8	0.0617744	0.0061025	0.0354661	0.013076
219	0.0614475	0.0066422	0.035455	0.0119295
219.2	0.0622166	0.0052536	0.0339533	0.0112715
219.4	0.0597922	0.0069356	0.0350543	0.011275
219.6	0.0600775	0.0054118	0.0344669	0.011277
219.8	0.060079	0.0066458	0.0344977	0.0102685
220	0.0619211	0.0066098	0.0339034	0.0102545
220.2	0.0614078	0.00643235	0.0340154	0.009833
220.4	0.0626728	0.00628855	0.032815	0.01027
220.6	0.0620027	0.0081255	0.033293	0.0099915
220.8	0.0618419	0.00750015	0.0332032	0.009823
221	0.0613126	0.00757785	0.0331847	0.010601
221.2	0.0604564	0.00859215	0.0330139	0.012655
221.4	0.0604517	0.0078188	0.0333728	0.0126765
221.6	0.0616878	0.00815335	0.0347126	0.011819
221.8	0.0621069	0.0084385	0.0340921	0.0117145
222	0.0618729	0.007469	0.034207	0.011606
222.2	0.0618816	0.0077494	0.0351651	0.010255
222.4	0.0609219	0.00762895	0.0338846	0.009654
222.6	0.0590391	0.00772395	0.0324654	0.011342
222.8	0.0582923	0.0077148	0.032467	0.0112275
223	0.0579806	0.0082159	0.0314766	0.0100825
223.2	0.0591806	0.00737395	0.0307477	0.009628
223.4	0.060143	0.0073382	0.0318705	0.0099945
223.6	0.0613983	0.006007	0.0322725	0.009538
223.8	0.0619681	0.0060937	0.0325891	0.0106225
224	0.061583	0.0058274	0.0329079	0.0115155
224.2	0.0606985	0.0066425	0.0327413	0.012392
224.4	0.0600919	0.0054185	0.0327465	0.0115375
224.6	0.0601989	0.0055011	0.031189	0.009822
224.8	0.0601599	0.00419615	0.0304724	0.008834
225	0.0602727	0.0039982	0.0303166	0.0062875
225.2	0.0596905	0.0032015	0.0299391	0.005322
225.4	0.0602601	0.002925	0.0300117	0.0035055
225.6	0.0594598	0.00371205	0.030351	0.00428
225.8	0.0583542	0.0044034	0.0300195	0.004229
226	0.057896	0.00464585	0.0310797	0.0061615
226.2	0.0597397	0.00462175	0.030534	0.006631
226.4	0.0590999	0.0047324	0.0304498	0.007647
226.6	0.05855	0.0044613	0.0298611	0.008772
226.8	0.0591596	0.0042273	0.0300585	0.009005
227	0.059503	0.00451175	0.0298351	0.0099605
227.2	0.0583674	0.00435045	0.0301267	0.0094715
227.4	0.0569794	0.005818	0.0305691	0.0098945
227.6	0.0574861	0.0045986	0.0311608	0.0092775
227.8	0.0575317	0.0039469	0.0301906	0.009029
228	0.0573148	0.00335625	0.0302954	0.006785
228.2	0.0567849	0.00372655	0.030726	0.0079105
228.4	0.0572368	0.00350425	0.0295796	0.0071565
228.6	0.0570729	0.00374055	0.0299782	0.006735
228.8	0.0567687	0.00371335	0.0308257	0.006087
229	0.0567115	0.0050775	0.0295037	0.007106
229.2	0.0558518	0.0052662	0.0300844	0.005746
229.4	0.0568986	0.00517855	0.0304716	0.0061125
229.6	0.055835	0.00459905	0.0296839	0.0073635
229.8	0.0564365	0.00601565	0.0302344	0.006937
230	0.0567908	0.00447355	0.0300923	0.0073865
230.2	0.0578447	0.0042288	0.0293023	0.007256
230.4	0.0556996	0.0043191	0.0282373	0.006615
230.6	0.0563576	0.00575095	0.0286062	0.0055325
230.8	0.0570234	0.00561025	0.0278631	0.0069685
231	0.0551548	0.0062416	0.029107	0.0051995
231.2	0.0549705	0.0057795	0.028843	0.0063955
231.4	0.0563186	0.0058445	0.028726	0.005983
231.6	0.0562586	0.0046327	0.0289895	0.0060255
231.8	0.0544509	0.0032326	0.0293494	0.0048415
232	0.0565469	0.00309815	0.0278355	0.0048935
232.2	0.0559478	0.00308175	0.0275683	0.003388
232.4	0.0558625	0.00204635	0.0288368	0.00439
232.6	0.05641	0.0026051	0.0290351	0.005473
232.8	0.0559074	0.00343005	0.029462	0.005297
233	0.05565	0.00184175	0.0305442	0.0074555
233.2	0.0563482	0.0015248	0.0312283	0.007559
233.4	0.0563707	0.00162605	0.0305864	0.009101
233.6	0.0561002	0.00070355	0.0297483	0.00683
233.8	0.0558508	-0.00045485	0.0286893	0.0071045
234	0.0551081	0.0003405	0.0285511	0.005814
234.2	0.0550514	0.0003205	0.0283154	0.0065425
234.4	0.0555614	0.00023865	0.0281761	0.0052425
234.6	0.0560484	0.0013973	0.0291493	0.0053095
234.8	0.0573	0.00278505	0.0289011	0.0056295
235	0.0576591	0.0040823	0.0287974	0.0059425
235.2	0.0572259	0.0041366	0.0283435	0.005709
235.4	0.0556876	0.00485935	0.0293756	0.0052075
235.6	0.0550763	0.00416295	0.0284233	0.0055405
235.8	0.053891	0.00349295	0.0292639	0.0050845
236	0.0539694	0.00235575	0.027752	0.0064035
236.2	0.0547222	0.0039699	0.0283476	0.006609
236.4	0.0558112	0.00306395	0.026817	0.0060325
236.6	0.0554916	0.00330275	0.0272973	0.0068955
236.8	0.0567686	0.002634	0.0265087	0.007494
237	0.0570672	0.0025062	0.0274128	0.0058055
237.2	0.0551145	0.0004703	0.0277722	0.0060005
237.4	0.0549955	0.0019746	0.0289895	0.006531
237.6	0.0542601	0.00194575	0.0296797	0.0065685
237.8	0.0537543	0.002908	0.0301927	0.0064975
238	0.0525955	0.00259395	0.0303586	0.0066085
238.2	0.0526333	0.00340795	0.0301812	0.0066725
238.4	0.0529129	0.00110955	0.030087	0.0082495
238.6	0.0520946	0.00090655	0.0288206	0.0086515
238.8	0.0520809	0.00028875	0.0288454	0.0087875
239	0.0526925	0.00077895	0.0301413	0.010227
239.2	0.0518161	0.00046395	0.029876	0.0092275
239.4	0.0499452	0.00164525	0.0288061	0.0080545
239.6	0.0508677	0.0017049	0.0293531	0.007259
239.8	0.0503489	0.0030067	0.0282409	0.006742
240	0.0499767	0.00318315	0.0265598	0.0056375
240.2	0.0508889	0.00350515	0.0271103	0.006118
240.4	0.0517279	0.00300235	0.0286504	0.006623
240.6	0.0527927	0.00278805	0.0286012	0.0071995
240.8	0.0518212	0.0029395	0.028186	0.0072545
241	0.0515265	0.00225185	0.028163	0.007185
241.2	0.0522525	0.0007922	0.0267058	0.007763
241.4	0.0512656	0.00141555	0.0252303	0.007679
241.6	0.0496955	0.0017832	0.0244894	0.0066345
241.8	0.0504924	0.00108915	0.0247108	0.006133
242	0.050109	0.00066415	0.0251478	0.0061785
242.2	0.0503194	0.0025668	0.0252242	0.004895
242.4	0.0522779	0.00130925	0.0251313	0.0041985
242.6	0.0524423	0.00024185	0.025124	0.004328
242.8	0.0526636	-0.00046235	0.026308	0.0042605
243	0.0533106	0.00048295	0.0264888	0.004712
243.2	0.0531885	-0.00024305	0.0264944	0.0042665
243.4	0.0516396	0.00105685	0.0275845	0.0033005
243.6	0.0522121	0.00023865	0.0278498	0.002582
243.8	0.0517383	0.00076175	0.02814	0.0037765
244	0.051235	0.00068515	0.0280477	0.002731
244.2	0.0505741	3.635e-05	0.0289003	0.005066
244.4	0.0511006	-0.0010314	0.0269903	0.005268
244.6	0.0504542	0.0008366	0.0271995	0.006789
244.8	0.049918	-0.00029575	0.0263242	0.0066935
245	0.0506816	-0.0012196	0.0253037	0.0067445
245.2	0.050853	8.5e-07	0.0248088	0.005526
245.4	0.0512902	0.00043985	0.0249764	0.005724
245.6	0.0510787	0.0001045	0.0238972	0.0053845
245.8	0.0520437	0.0001036	0.024249	0.005302
246	0.0506751	-0.0001288	0.024682	0.005578
246.2	0.0501889	-0.00056495	0.0242964	0.005085
246.4	0.0504597	-0.00176315	0.0257106	0.0055735
246.6	0.0513253	-0.0023052	0.0269315	0.0048615
246.8	0.0506607	-0.0016677	0.026491	0.0045115
247	0.0510337	-0.0017793	0.0269397	0.0036755
247.2	0.050889	-0.0022796	0.027697	0.0056145
247.4	0.050007	-0.0013704	0.0281031	0.0049715
247.6	0.0496684	-0.00127275	0.027978	0.004699
247.8	0.0489654	-0.0018492	0.0283292	0.0056385
248	0.049782	-0.0014863	0.0291571	0.006864
248.2	0.0501771	-0.0017028	0.0300912	0.0044615
248.4	0.0502565	-0.00121285	0.0283036	0.0056435
248.6	0.0495877	-0.0013818	0.0285196	0.006028
248.8	0.0501627	-6.91e-05	0.0291857	0.00334
249	0.0495182	-0.00075735	0.0284948	0.002681
249.2	0.0499226	-0.00089155	0.0276328	0.0031965
249.4	0.0492598	-0.0017713	0.0284594	0.0020415
249.6	0.0491196	-0.00091575	0.027147	0.001814
249.8	0.0488259	-0.0026514	0.026695	0.003775
250	0.0487138	-0.00247665	0.026517	0.003551
250.2	0.0484477	-0.0023459	0.0255931	0.003581
250.4	0.0484373	-0.0031294	0.0255536	0.004606
250.6	0.0490409	-0.00495025	0.0264808	0.005042
250.8	0.0502088	-0.0048762	0.0253914	0.0046685
251	0.0512926	-0.00360355	0.0255575	0.00478
251.2	0.0500323	-0.003243	0.0248272	0.0050465
251.4	0.0498663	-0.00154265	0.0262832	0.0051365
251.6	0.0499434	-0.0001567	0.0265054	0.004676
251.8	0.0484423	0.0006797	0.0274582	0.0048635
252	0.047561	-0.0007279	0.0270785	0.004788
252.2	0.0489491	-0.00059875	0.0282777	0.004529
252.4	0.0500632	-0.00043565	0.0254323	0.00359
252.6	0.0499674	-0.000481	0.024832	0.003875
252.8	0.0512373	-0.00147085	0.0246701	0.003102
253	0.0505475	-1.91e-05	0.0242219	0.0035945
253.2	0.0495429	-0.0005326	0.0247685	0.0023435
253.4	0.0496161	-0.00179985	0.0267259	0.00236
253.6	0.0498377	-0.0020419	0.0270861	0.002514
253.8	0.0487811	-0.002617	0.0271929	0.002612
254	0.0491714	-0.0039215	0.0271339	0.0017315
254.2	0.0489351	-0.0039863	0.0264314	0.0027065
254.4	0.0479713	-0.002937	0.0254565	0.0029955
254.6	0.0479032	-0.0040992	0.02578	0.0018505
254.8	0.0481818	-0.0035471	0.0256236	0.001398
255	0.0486609	-0.0024035	0.0249053	0.000899
255.2	0.049316	-0.00325245	0.0244644	0.0014375
255.4	0.0495096	-0.0039292	0.0254496	0.000415
255.6	0.0485182	-0.0027122	0.0245989	0.000876
255.8	0.0491029	-0.00275595	0.0240243	0.0014105
256	0.0479843	-0.0037756	0.0249342	0.002667
256.2	0.0471988	-0.0027534	0.0261668	0.0032175
256.4	0.0481478	-0.0036321	0.0247976	0.003676
256.6	0.0475117	-0.0040678	0.0240719	0.004071
256.8	0.0466343	-0.00493625	0.0238187	0.0045475
257	0.0478444	-0.0043129	0.0233953	0.0031795
257.2	0.0488097	-0.0054302	0.0233832	0.001734
257.4	0.0484501	-0.00505295	0.0239472	0.0017515
257.6	0.0485806	-0.005764	0.0248666	0.001374
257.8	0.0495354	-0.0049536	0.0251666	-0.000416
258	0.0488739	-0.005289	0.024851	0.000689
258.2	0.0488407	-0.00555255	0.0241177	0.0017505
258.4	0.0467802	-0.00571655	0.0229308	0.002258
258.6	0.047958	-0.00547265	0.02311	0.00223
258.8	0.0475701	-0.00484735	0.0234843	0.003588
259	0.0465389	-0.00463475	0.023621	0.003012
259.2	0.0462564	-0.0041259	0.022837	0.002784
259.4	0.0480582	-0.0041056	0.0238818	0.0022985
259.6	0.0481539	-0.0048032	0.0236508	0.0022545
259.8	0.0476054	-0.0045732	0.0238398	0.0019815
260	0.0491891	-0.0046565	0.0233632	0.0016705
260.2	0.050017	-0.0051082	0.0238527	0.0010455
260.4	0.0497909	-0.0056343	0.0241564	0.000491
260.6	0.0496361	-0.0045956	0.0249986	0.000389
260.8	0.0497986	-0.00608305	0.0252648	0.000275
261	0.0487753	-0.00684095	0.0262399	0.0011125
261.2	0.0481	-0.00506775	0.025488	0.0021855
261.4	0.0474869	-0.005945	0.0257462	0.0033
261.6	0.0466994	-0.00552545	0.024255	0.0039435
261.8	0.0474161	-0.00509415	0.0243914	0.0049235
262	0.0481273	-0.0047303	0.0245885	0.0041675
262.2	0.0476458	-0.00592865	0.0253458	0.003002
262.4	0.0477881	-0.00537975	0.0242418	0.0020065
262.6	0.0476725	-0.00622095	0.0247217	0.001706
262.8	0.0465902	-0.0065405	0.0239653	0.00019
263	0.0463724	-0.00637575	0.0230228	0.000362
263.2	0.0461043	-0.0065042	0.0230378	0.0004765
263.4	0.0468917	-0.00465615	0.0233882	0.000386
263.6	0.0466002	-0.00430285	0.0220803	-0.000284
263.8	0.0469063	-0.0039055	0.0232023	0.00061
264	0.046659	-0.00353545	0.0239752	0.0002455
264.2	0.0462397	-0.0031012	0.023669	0.0003195
264.4	0.0461211	-0.0030161	0.0235175	0.0014615
264.6	0.0474074	-0.0025713	0.0243758	0.002978
264.8	0.0472482	-0.00377885	0.0229592	0.0036615
265	0.0474825	-0.0043618	0.0223571	0.0052395
265.2	0.0475872	-0.00524585	0.0217946	0.004545
265.4	0.0467949	-0.0073709	0.021969	0.003575
265.6	0.0455428	-0.00774365	0.0231675	0.0027715
265.8	0.0454638	-0.00688885	0.0227395	0.0008345
266	0.045316	-0.006266	0.0227262	-0.0005675
266.2	0.0449701	-0.00607095	0.0235695	0.000214
266.4	0.0456751	-0.00502515	0.0236263	0.000964
266.6	0.0460673	-0.0052654	0.0222558	0.000771
266.8	0.0456794	-0.0054704	0.0234304	0.0019545
267	0.0465038	-0.00693865	0.0243748	0.0022435
267.2	0.0467333	-0.00566975	0.0257173	0.002426
267.4	0.0459381	-0.0060267	0.0256673	0.001488
267.6	0.0454251	-0.00622385	0.0262685	0.0008335
267.8	0.0454003	-0.00571015	0.0252356	0.0005585
268	0.0436937	-0.00593025	0.0246443	0.0002565
268.2	0.0443931	-0.00722285	0.0231032	-0.000379
268.4	0.0434075	-0.00673175	0.0222697	-0.000642
268.6	0.043301	-0.00680645	0.0227505	-0.000625
268.8	0.0425584	-0.006771	0.0233732	-0.000507
269	0.0439182	-0.0061537	0.0237493	-0.0013115
269.2	0.0437386	-0.00642235	0.023251	-0.000788
269.4	0.045587	-0.00731245	0.0257474	-0.0007215
269.6	0.04635	-0.00724915	0.0253142	-0.000918
269.8	0.0467011	-0.0074311	0.0255898	-0.0009685
