# Supplementary material for: HetL, HetR and PatS form a reaction-diffusion system to control pattern formation in the cyanobacterium nostoc PCC 7120
Source: eLife journal article supplement (doi:10.7554/elife.59190), 2020-08-07
Supplement: supp [file elife-59190-supp-v1.zip › elife_poa_e59190_Figure_2_figure_supplement_2_source_data_1.xlsx]

## Sheet: Feuil1
Fig2- S2. BLi assay between HetL and HetR in the presence of PatS-6. 10 μM of HetL was incubated 5 mins with different concentrations of PatS-6 at 0, 0.05, 0.1 and 0.5μM before bringing HetL in contact with the bound HetR. Each curve represents the average of two experiments minus the control experiment. Control experiment HetL 10μM loaded onto a biosensor devoid of HetR.
Time (s)	Binding response (nm)
	0 µM PatS-6	0.05 µM PatS-6	0.1 µM PatS-6	0.5 µM PatS-6
0	0	0	0	0
0.2	-0.00342247	-0.00489854	-0.00653578	-0.00585093
0.4	-0.00506453	-0.00597229	-0.00857999	-0.00750935
0.6	-0.00552311	-0.00639537	-0.0102914	-0.00867574
0.8	-0.00639188	-0.00714116	-0.0113728	-0.00877139
1	-0.00689254	-0.00775247	-0.0124171	-0.00922406
1.2	-0.00669984	-0.00760248	-0.0119468	-0.00815041
1.4	-0.00788883	-0.00869735	-0.0136514	-0.00859839
1.6	-0.0101656	-0.00971058	-0.0151306	-0.00908437
1.8	-0.0109507	-0.0111382	-0.0160653	-0.0101465
2	-0.0110422	-0.0109412	-0.0165047	-0.009612
2.2	-0.0118971	-0.0114554	-0.0165168	-0.00992968
2.4	-0.0110377	-0.0107487	-0.0149044	-0.00904884
2.6	-0.0102942	-0.0106083	-0.0139596	-0.00880263
2.8	-0.0103904	-0.0100143	-0.0139997	-0.00809688
3	-0.011445	-0.0109908	-0.0142856	-0.00810159
3.2	-0.0120245	-0.0104993	-0.0151697	-0.00837115
3.4	-0.0130259	-0.0117594	-0.0167569	-0.00981457
3.6	-0.0116601	-0.010683	-0.015999	-0.0081454
3.8	-0.0124469	-0.0106095	-0.0165318	-0.00888066
4	-0.0133907	-0.0107944	-0.0168837	-0.00985153
4.2	-0.013869	-0.0119463	-0.0181546	-0.0101017
4.4	-0.0143408	-0.0113553	-0.0174054	-0.00902601
4.6	-0.0160521	-0.0131287	-0.0197587	-0.0112039
4.8	-0.0157328	-0.0132537	-0.018887	-0.0110934
5	-0.0144269	-0.0135945	-0.0186138	-0.010668
5.2	-0.0149522	-0.0140681	-0.0185662	-0.0113182
5.4	-0.0159521	-0.0155063	-0.0197884	-0.0126459
5.6	-0.0166528	-0.0165287	-0.0192314	-0.013487
5.8	-0.0174234	-0.0177865	-0.0211437	-0.0146539
6	-0.0180203	-0.017187	-0.0206623	-0.0150288
6.2	-0.0172062	-0.0162926	-0.0194508	-0.0147017
6.4	-0.0166916	-0.0160748	-0.019854	-0.0150382
6.6	-0.0160873	-0.0155011	-0.0198896	-0.0131963
6.8	-0.0158791	-0.0149418	-0.0188046	-0.0126668
7	-0.0159829	-0.0151771	-0.0197135	-0.012439
7.2	-0.016272	-0.0159443	-0.0208723	-0.0124961
7.4	-0.015117	-0.0146506	-0.0197013	-0.0112478
7.6	-0.0161717	-0.0153974	-0.0204796	-0.0130051
7.8	-0.0163371	-0.0161345	-0.0215494	-0.0131683
8	-0.0173191	-0.0170166	-0.0226928	-0.0148678
8.2	-0.0182971	-0.017521	-0.0236361	-0.0158216
8.4	-0.0192172	-0.0185903	-0.0243133	-0.0169517
8.6	-0.0187389	-0.0176045	-0.024397	-0.0158445
8.8	-0.018668	-0.0165813	-0.0238854	-0.0150236
9	-0.0191654	-0.0177755	-0.0237919	-0.0151564
9.2	-0.0184107	-0.0175581	-0.0224756	-0.0142854
9.4	-0.0184755	-0.0179392	-0.0230466	-0.0137228
9.6	-0.0188636	-0.0184833	-0.0236638	-0.0151826
9.8	-0.0199783	-0.0199075	-0.0241656	-0.0165876
10	-0.0205457	-0.0199851	-0.0254825	-0.0166111
10.2	-0.0209983	-0.0206792	-0.02613	-0.0176652
10.4	-0.0221545	-0.0217754	-0.026946	-0.0191593
10.6	-0.0224709	-0.0218058	-0.0268255	-0.0191166
10.8	-0.021683	-0.0211543	-0.0264104	-0.0185503
11	-0.0216971	-0.02127	-0.0263306	-0.019694
11.2	-0.022283	-0.0216145	-0.0267362	-0.0192057
11.4	-0.021132	-0.0206706	-0.0250019	-0.0182544
11.6	-0.0211998	-0.0214651	-0.0249474	-0.0187881
11.8	-0.0213321	-0.0226128	-0.0260539	-0.0197241
12	-0.0211501	-0.0225766	-0.0261542	-0.0193334
12.2	-0.0211399	-0.0220907	-0.0267538	-0.0192622
12.4	-0.0223852	-0.0232829	-0.0289972	-0.0204894
12.6	-0.0231718	-0.0234529	-0.0293556	-0.0200229
12.8	-0.0228802	-0.0223068	-0.0297134	-0.0198258
13	-0.0233742	-0.0227211	-0.0305809	-0.0204104
13.2	-0.02266	-0.0222488	-0.0299286	-0.0201212
13.4	-0.0228477	-0.0220355	-0.0294537	-0.0201593
13.6	-0.0229063	-0.022283	-0.0298646	-0.0216359
13.8	-0.0246073	-0.0242352	-0.0300918	-0.0224698
14	-0.023387	-0.0233128	-0.02826	-0.0205972
14.2	-0.0242516	-0.0242593	-0.0290503	-0.02188
14.4	-0.0242991	-0.0245495	-0.0300147	-0.0216802
14.6	-0.0245423	-0.0252449	-0.030431	-0.0215706
14.8	-0.0236917	-0.0236336	-0.029788	-0.0204751
15	-0.024336	-0.024237	-0.0304297	-0.0210228
15.2	-0.0247824	-0.0238698	-0.0299419	-0.0212114
15.4	-0.024591	-0.0229367	-0.0294944	-0.0213311
15.6	-0.0232229	-0.0218449	-0.0290768	-0.0203338
15.8	-0.0231453	-0.0225785	-0.0305547	-0.0213848
16	-0.0234374	-0.0228739	-0.0305105	-0.0218665
16.2	-0.0238819	-0.0238187	-0.0322264	-0.0219068
16.4	-0.0238287	-0.0242201	-0.0318398	-0.022272
16.6	-0.0250618	-0.024372	-0.0324103	-0.0230771
16.8	-0.0259925	-0.0242399	-0.0313266	-0.0229282
17	-0.0261426	-0.0229703	-0.0314403	-0.0234497
17.2	-0.0257749	-0.0235571	-0.0305201	-0.0238567
17.4	-0.026013	-0.0235342	-0.0312073	-0.0233617
17.6	-0.0251314	-0.0231814	-0.0311174	-0.0223078
17.8	-0.0247969	-0.0239303	-0.0312532	-0.0233331
18	-0.0244656	-0.0252817	-0.0314525	-0.0232724
18.2	-0.0253145	-0.0249254	-0.0312945	-0.0231874
18.4	-0.0266348	-0.026097	-0.032433	-0.0241651
18.6	-0.0272864	-0.0272647	-0.0326215	-0.02524
18.8	-0.0269128	-0.0263064	-0.0318251	-0.0233116
19	-0.0276896	-0.0258365	-0.0328446	-0.0234886
19.2	-0.0264769	-0.0254104	-0.0329104	-0.0227778
19.4	-0.0253012	-0.0244526	-0.0319904	-0.0219668
19.6	-0.0259044	-0.0237744	-0.0315147	-0.0222665
19.8	-0.0264545	-0.0243556	-0.0319111	-0.022787
20	-0.0258289	-0.0242913	-0.0306157	-0.0219242
20.2	-0.0259143	-0.0242634	-0.030962	-0.0228602
20.4	-0.0256578	-0.0238472	-0.0303921	-0.0225917
20.6	-0.024857	-0.0244348	-0.0312071	-0.0223176
20.8	-0.0255464	-0.0254064	-0.0327083	-0.0228845
21	-0.0250165	-0.0256929	-0.0340411	-0.0237169
21.2	-0.0251342	-0.0250699	-0.0334539	-0.0230974
21.4	-0.0260069	-0.0259378	-0.0341668	-0.02405
21.6	-0.0268619	-0.0257982	-0.0342707	-0.0241659
21.8	-0.0263195	-0.0252337	-0.0342457	-0.0239817
22	-0.0272275	-0.0254965	-0.0345166	-0.0240391
22.2	-0.0285081	-0.0265373	-0.035607	-0.0251435
22.4	-0.0278284	-0.026373	-0.0354464	-0.0251337
22.6	-0.0270932	-0.0264112	-0.0349307	-0.0252902
22.8	-0.027578	-0.0264007	-0.0356004	-0.0262634
23	-0.0274278	-0.0264359	-0.0349443	-0.0266339
23.2	-0.0262347	-0.0259082	-0.0347102	-0.0261968
23.4	-0.0260113	-0.025092	-0.0341641	-0.0258213
23.6	-0.02578	-0.0258139	-0.0342668	-0.0253731
23.8	-0.0263323	-0.0263982	-0.0337643	-0.0253364
24	-0.0252223	-0.0256714	-0.033657	-0.0237964
24.2	-0.0253043	-0.0259653	-0.0336489	-0.0236865
24.4	-0.0253202	-0.0271961	-0.0346232	-0.0247043
24.6	-0.0258594	-0.0258811	-0.0340115	-0.0240036
24.8	-0.0238345	-0.0239505	-0.0331156	-0.0234229
25	-0.0255695	-0.0247664	-0.032683	-0.0241616
25.2	-0.0259356	-0.024458	-0.0330688	-0.0246901
25.4	-0.0267168	-0.0249666	-0.033007	-0.0241225
25.6	-0.027699	-0.0266009	-0.0347692	-0.0258467
25.8	-0.028739	-0.0280849	-0.0355695	-0.0256084
26	-0.0282481	-0.0280052	-0.036292	-0.0254717
26.2	-0.028331	-0.0287397	-0.0359073	-0.0255549
26.4	-0.0277509	-0.0276394	-0.0352302	-0.0248738
26.6	-0.0280766	-0.0276327	-0.0346308	-0.0247097
26.8	-0.0273017	-0.0270613	-0.0346408	-0.0243477
27	-0.0273594	-0.0267698	-0.0341641	-0.024764
27.2	-0.0269026	-0.0256128	-0.0343154	-0.0235181
27.4	-0.0280991	-0.026176	-0.0350244	-0.0238169
27.6	-0.02713	-0.0260303	-0.035201	-0.0242607
27.8	-0.0282558	-0.0259358	-0.0350237	-0.0249533
28	-0.0286463	-0.0264022	-0.0350016	-0.025456
28.2	-0.0286366	-0.0274167	-0.0350162	-0.0258895
28.4	-0.0280004	-0.0276897	-0.0349086	-0.0258314
28.6	-0.0272395	-0.0267966	-0.0338668	-0.0245938
28.8	-0.0265204	-0.0270718	-0.0339334	-0.0244221
29	-0.0265392	-0.0276718	-0.0352762	-0.0246847
29.2	-0.0271078	-0.0289129	-0.036362	-0.0262331
29.4	-0.0277509	-0.0294322	-0.0378107	-0.0271381
29.6	-0.0288154	-0.030072	-0.0394613	-0.0274556
29.8	-0.028913	-0.0306245	-0.0395667	-0.0278266
30	0.018628	0.0068455	-0.0048275	0.006266
30.2	0.057788	0.045321	0.0306725	0.0376675
30.4	0.116031	0.101644	0.08728	0.08213
30.6	0.155612	0.150414	0.128482	0.115354
30.8	0.191699	0.180871	0.161005	0.136808
31	0.230323	0.218258	0.196704	0.16149
31.2	0.262858	0.251236	0.229066	0.178669
31.4	0.286584	0.273645	0.246188	0.186041
31.6	0.306374	0.289204	0.261917	0.190098
31.8	0.319841	0.301909	0.272487	0.191372
32	0.331427	0.311194	0.28156	0.190703
32.2	0.340872	0.317285	0.285672	0.188548
32.4	0.347387	0.32289	0.290237	0.184431
32.6	0.352394	0.326238	0.29304	0.178856
32.8	0.359571	0.330315	0.295274	0.173917
33	0.36332	0.332524	0.296027	0.172023
33.2	0.365524	0.334292	0.295315	0.167274
33.4	0.371577	0.336865	0.298665	0.165242
33.6	0.375885	0.339111	0.297764	0.164477
33.8	0.378854	0.340782	0.298252	0.161813
34	0.381714	0.341947	0.296349	0.156351
34.2	0.385203	0.343297	0.297559	0.15552
34.4	0.385941	0.342919	0.293641	0.152423
34.6	0.385271	0.342048	0.291189	0.146683
34.8	0.386835	0.340875	0.29027	0.144792
35	0.386534	0.338755	0.287909	0.143182
35.2	0.387734	0.339137	0.285859	0.140552
35.4	0.388757	0.338235	0.284658	0.138839
35.6	0.389825	0.336194	0.282992	0.138055
35.8	0.38905	0.335657	0.2794	0.136171
36	0.390728	0.336874	0.277573	0.13562
36.2	0.392064	0.334344	0.274062	0.135148
36.4	0.394342	0.334848	0.273419	0.135009
36.6	0.3943	0.336023	0.271257	0.13301
36.8	0.397093	0.335452	0.269483	0.130577
37	0.397744	0.332979	0.268481	0.129248
37.2	0.39869	0.333429	0.267527	0.128505
37.4	0.3989	0.332625	0.267099	0.12757
37.6	0.403444	0.331465	0.265757	0.129804
37.8	0.40438	0.332243	0.265012	0.130585
38	0.404289	0.33158	0.26245	0.129199
38.2	0.404601	0.331518	0.260502	0.127722
38.4	0.403546	0.331378	0.256688	0.126051
38.6	0.402622	0.331343	0.255536	0.123933
38.8	0.401705	0.329359	0.252007	0.12224
39	0.402213	0.329557	0.250974	0.122666
39.2	0.4014	0.328319	0.247735	0.12104
39.4	0.403956	0.326848	0.247432	0.121371
39.6	0.403985	0.324764	0.246134	0.120564
39.8	0.407319	0.326542	0.246968	0.122878
40	0.408936	0.326158	0.245338	0.121801
40.2	0.412884	0.327243	0.248604	0.123613
40.4	0.411654	0.326138	0.245062	0.121946
40.6	0.413546	0.327111	0.242645	0.123366
40.8	0.411602	0.323952	0.239858	0.120016
41	0.411401	0.322447	0.238295	0.120652
41.2	0.407151	0.317146	0.232836	0.117894
41.4	0.408558	0.315911	0.231941	0.116668
41.6	0.408385	0.316381	0.231805	0.114781
41.8	0.40855	0.315978	0.230103	0.115265
42	0.408027	0.316844	0.228007	0.114975
42.2	0.408513	0.318547	0.227706	0.114631
42.4	0.412069	0.320604	0.228974	0.118362
42.6	0.412227	0.316961	0.226993	0.117948
42.8	0.412668	0.314283	0.224989	0.116994
43	0.415141	0.313011	0.225283	0.116631
43.2	0.416661	0.312277	0.223473	0.117511
43.4	0.413357	0.309346	0.21928	0.115979
43.6	0.4134	0.310082	0.218613	0.116329
43.8	0.412712	0.311995	0.217157	0.115607
44	0.412648	0.311311	0.215765	0.11619
44.2	0.412986	0.310441	0.213735	0.114591
44.4	0.415092	0.311356	0.213623	0.113636
44.6	0.417272	0.311888	0.212766	0.113999
44.8	0.417766	0.311667	0.212512	0.115004
45	0.417942	0.311337	0.212254	0.113854
45.2	0.417117	0.310708	0.211425	0.113085
45.4	0.415849	0.310879	0.210586	0.112985
45.6	0.414701	0.309186	0.208349	0.113199
45.8	0.414886	0.308237	0.206926	0.111884
46	0.413973	0.306714	0.204662	0.111617
46.2	0.415216	0.307155	0.205232	0.11419
46.4	0.416972	0.306374	0.204858	0.115073
46.6	0.415335	0.306331	0.20354	0.11375
46.8	0.416064	0.306491	0.203007	0.115874
47	0.416214	0.306291	0.202649	0.116484
47.2	0.41678	0.304655	0.1999	0.113256
47.4	0.414741	0.302887	0.196657	0.110453
47.6	0.416673	0.302162	0.196914	0.111122
47.8	0.415859	0.300912	0.196099	0.109442
48	0.417503	0.300992	0.195777	0.110432
48.2	0.41773	0.302314	0.196724	0.113331
48.4	0.417446	0.301858	0.197145	0.11471
48.6	0.416093	0.298671	0.194518	0.114324
48.8	0.418278	0.299833	0.194441	0.115108
49	0.417013	0.298856	0.193455	0.113303
49.2	0.416793	0.298049	0.191684	0.111695
49.4	0.418498	0.298212	0.190246	0.113113
49.6	0.420872	0.300752	0.189914	0.11373
49.8	0.42043	0.300382	0.190133	0.114399
50	0.420668	0.300683	0.188995	0.115999
50.2	0.419611	0.297798	0.187443	0.115715
50.4	0.420868	0.297345	0.189617	0.115862
50.6	0.418575	0.29515	0.190033	0.115569
50.8	0.41968	0.295893	0.188792	0.117612
51	0.42027	0.296702	0.188061	0.117145
51.2	0.420868	0.299109	0.188174	0.117128
51.4	0.419617	0.299826	0.185672	0.116944
51.6	0.419135	0.300522	0.183401	0.115967
51.8	0.419523	0.299272	0.183457	0.114105
52	0.420281	0.299561	0.184264	0.113904
52.2	0.420538	0.299407	0.183092	0.11491
52.4	0.421335	0.299762	0.184471	0.115168
52.6	0.421515	0.297081	0.183467	0.114208
52.8	0.421337	0.297616	0.180915	0.114381
53	0.421082	0.296322	0.178768	0.115667
53.2	0.423967	0.297274	0.179545	0.117194
53.4	0.4232	0.293687	0.174488	0.11471
53.6	0.42521	0.29648	0.176831	0.116856
53.8	0.423893	0.294496	0.176961	0.115744
54	0.422695	0.294533	0.175682	0.114701
54.2	0.420045	0.290944	0.173553	0.11167
54.4	0.421252	0.294683	0.17732	0.114276
54.6	0.421713	0.294166	0.175065	0.113649
54.8	0.422524	0.296161	0.176806	0.11525
55	0.423824	0.296816	0.178893	0.115843
55.2	0.425237	0.298046	0.179931	0.118008
55.4	0.425722	0.298395	0.179034	0.118248
55.6	0.424606	0.298711	0.179291	0.120025
55.8	0.424461	0.297368	0.175956	0.119577
56	0.424069	0.295157	0.17299	0.119429
56.2	0.423808	0.295127	0.171548	0.118131
56.4	0.422961	0.292625	0.170527	0.116706
56.6	0.424526	0.292807	0.16993	0.116085
56.8	0.426094	0.292988	0.171179	0.117764
57	0.427402	0.295442	0.172063	0.11811
57.2	0.426198	0.294971	0.170101	0.118176
57.4	0.427244	0.297286	0.169773	0.120087
57.6	0.426708	0.296017	0.169095	0.120316
57.8	0.427236	0.297451	0.167893	0.12003
58	0.427192	0.297242	0.169823	0.120359
58.2	0.430436	0.299625	0.173667	0.122327
58.4	0.428941	0.297399	0.174557	0.121388
58.6	0.429127	0.299543	0.174076	0.120559
58.8	0.426567	0.297398	0.174292	0.118487
59	0.427061	0.297077	0.171197	0.118514
59.2	0.425745	0.296098	0.168714	0.117321
59.4	0.427006	0.29703	0.166244	0.117128
59.6	0.425638	0.295776	0.165149	0.117426
59.8	0.427059	0.296391	0.164941	0.118678
60	0.426266	0.296042	0.165268	0.117424
60.2	0.427654	0.295247	0.166468	0.117568
60.4	0.427528	0.295551	0.166762	0.118101
60.6	0.429164	0.295463	0.168146	0.118013
60.8	0.428585	0.294009	0.165795	0.116111
61	0.431593	0.295567	0.167108	0.117924
61.2	0.430171	0.296254	0.165115	0.118626
61.4	0.431769	0.297442	0.165526	0.118822
61.6	0.431507	0.296885	0.164133	0.118617
61.8	0.432688	0.298847	0.164806	0.120935
62	0.429111	0.297942	0.162627	0.121861
62.2	0.429609	0.296963	0.163015	0.121908
62.4	0.430005	0.296251	0.161897	0.121706
62.6	0.429295	0.29704	0.162212	0.122222
62.8	0.427631	0.295835	0.161061	0.122328
63	0.429812	0.294738	0.161113	0.11969
63.2	0.429625	0.296242	0.161482	0.11899
63.4	0.430218	0.295949	0.161378	0.118682
63.6	0.432739	0.295837	0.160743	0.119316
63.8	0.433064	0.296439	0.16147	0.11858
64	0.432561	0.296837	0.162362	0.120459
64.2	0.43303	0.295483	0.162329	0.118945
64.4	0.430688	0.296312	0.161339	0.117574
64.6	0.428716	0.295727	0.161267	0.117246
64.8	0.431984	0.297147	0.162979	0.119133
65	0.430429	0.296653	0.160369	0.116932
65.2	0.429681	0.296575	0.158726	0.117618
65.4	0.429996	0.296652	0.160246	0.118075
65.6	0.43107	0.298065	0.160542	0.118275
65.8	0.427824	0.297567	0.159147	0.116217
66	0.43138	0.298671	0.159717	0.118184
66.2	0.432881	0.30271	0.162661	0.12337
66.4	0.433588	0.302698	0.162107	0.125314
66.6	0.433852	0.303162	0.163994	0.125705
66.8	0.435315	0.30252	0.163981	0.125948
67	0.432783	0.301136	0.161972	0.123441
67.2	0.432951	0.297578	0.161733	0.120006
67.4	0.434242	0.296217	0.161271	0.120705
67.6	0.432459	0.29384	0.158638	0.118644
67.8	0.431071	0.293668	0.157592	0.118065
68	0.431897	0.294295	0.159848	0.120304
68.2	0.431831	0.294708	0.157328	0.121761
68.4	0.430917	0.295202	0.155701	0.119526
68.6	0.4311	0.29627	0.155628	0.120756
68.8	0.433766	0.297716	0.157412	0.12212
69	0.432189	0.295842	0.156269	0.12043
69.2	0.430787	0.295561	0.156188	0.118183
69.4	0.429306	0.296767	0.157401	0.120041
69.6	0.430909	0.296664	0.156783	0.120437
69.8	0.42949	0.294245	0.155351	0.12002
70	0.431767	0.296797	0.156656	0.122181
70.2	0.433331	0.298098	0.157419	0.122992
70.4	0.434976	0.29526	0.15544	0.122121
70.6	0.434638	0.296698	0.154843	0.122803
70.8	0.435761	0.299178	0.156919	0.123671
71	0.43646	0.300614	0.155686	0.12306
71.2	0.434897	0.298512	0.154083	0.122764
71.4	0.435044	0.300082	0.155425	0.123354
71.6	0.436023	0.300662	0.159591	0.124104
71.8	0.43416	0.29861	0.155516	0.121386
72	0.433785	0.297588	0.154773	0.12181
72.2	0.435451	0.300231	0.155725	0.122249
72.4	0.435414	0.2997	0.157422	0.1213
72.6	0.435144	0.299316	0.15447	0.120913
72.8	0.434949	0.299928	0.156861	0.122189
73	0.432962	0.299258	0.15741	0.121568
73.2	0.432408	0.29913	0.158128	0.121683
73.4	0.430766	0.299493	0.155647	0.122543
73.6	0.430696	0.29902	0.155206	0.122286
73.8	0.432427	0.3008	0.154636	0.122916
74	0.434996	0.303712	0.156945	0.12564
74.2	0.434009	0.30199	0.154789	0.125378
74.4	0.433943	0.302024	0.154674	0.123773
74.6	0.43503	0.303216	0.155465	0.125275
74.8	0.435754	0.303751	0.155738	0.127223
75	0.435841	0.302068	0.154598	0.127262
75.2	0.436262	0.302523	0.155495	0.12708
75.4	0.437735	0.303428	0.155929	0.128011
75.6	0.435901	0.30269	0.154303	0.126555
75.8	0.434362	0.30165	0.154621	0.125144
76	0.433473	0.300517	0.152907	0.123474
76.2	0.435648	0.303631	0.1536	0.124324
76.4	0.435762	0.303773	0.153922	0.124864
76.6	0.434968	0.303756	0.152229	0.123186
76.8	0.436545	0.30415	0.151736	0.123786
77	0.436958	0.304031	0.153891	0.125043
77.2	0.43757	0.302495	0.15486	0.124654
77.4	0.437912	0.303553	0.156163	0.126026
77.6	0.43946	0.305286	0.158415	0.128388
77.8	0.439427	0.304592	0.15833	0.128004
78	0.439229	0.306066	0.156189	0.127096
78.2	0.438619	0.305874	0.155766	0.127204
78.4	0.440111	0.305739	0.156385	0.12808
78.6	0.440352	0.303863	0.156677	0.128884
78.8	0.439887	0.304329	0.156351	0.128243
79	0.439532	0.304748	0.157418	0.129055
79.2	0.4387	0.307188	0.157889	0.129598
79.4	0.435379	0.30526	0.154822	0.126412
79.6	0.435208	0.304478	0.154619	0.124286
79.8	0.435711	0.304049	0.154568	0.125112
80	0.437547	0.303855	0.154979	0.125798
80.2	0.438603	0.302792	0.153887	0.127054
80.4	0.439769	0.303138	0.156138	0.128486
80.6	0.440116	0.305482	0.156985	0.129523
80.8	0.439609	0.306727	0.156367	0.128795
81	0.437992	0.30614	0.154161	0.126983
81.2	0.437717	0.305109	0.15371	0.125966
81.4	0.436464	0.305543	0.150199	0.124086
81.6	0.437247	0.304158	0.150201	0.123247
81.8	0.438577	0.303536	0.152289	0.12508
82	0.440164	0.30637	0.155033	0.127605
82.2	0.441549	0.307535	0.1563	0.128881
82.4	0.442377	0.308175	0.158064	0.131192
82.6	0.441908	0.307895	0.156158	0.130717
82.8	0.440825	0.307699	0.154532	0.129388
83	0.440638	0.306329	0.153488	0.128392
83.2	0.439105	0.30547	0.151187	0.126823
83.4	0.440705	0.305692	0.153259	0.127666
83.6	0.442195	0.308735	0.154363	0.130177
83.8	0.442872	0.310347	0.155625	0.131826
84	0.442489	0.310462	0.155444	0.131605
84.2	0.444024	0.311295	0.156631	0.13234
84.4	0.443663	0.310233	0.154444	0.129917
84.6	0.442096	0.30809	0.153194	0.129537
84.8	0.441954	0.306509	0.151239	0.127831
85	0.440721	0.306498	0.152017	0.126981
85.2	0.438498	0.3047	0.150647	0.126857
85.4	0.440053	0.30766	0.153096	0.13038
85.6	0.440801	0.308242	0.153502	0.130369
85.8	0.440574	0.310122	0.155512	0.132152
86	0.442991	0.31165	0.154435	0.133208
86.2	0.444051	0.312781	0.15642	0.135174
86.4	0.442055	0.31076	0.153811	0.13287
86.6	0.442527	0.311347	0.154443	0.133898
86.8	0.441282	0.310019	0.152614	0.132914
87	0.440076	0.309069	0.152188	0.132707
87.2	0.440174	0.310289	0.151817	0.131752
87.4	0.440459	0.311252	0.153842	0.132752
87.6	0.440375	0.312236	0.154931	0.132319
87.8	0.442142	0.31294	0.155217	0.132327
88	0.441531	0.312585	0.155777	0.132327
88.2	0.441586	0.313281	0.155641	0.131957
88.4	0.443221	0.314389	0.155891	0.131772
88.6	0.442382	0.312362	0.152188	0.129002
88.8	0.444956	0.314173	0.155437	0.130463
89	0.445697	0.315748	0.155489	0.131642
89.2	0.445573	0.314373	0.15428	0.131856
89.4	0.444244	0.312839	0.152797	0.131164
89.6	0.445926	0.314352	0.155588	0.134001
89.8	0.442964	0.313787	0.152992	0.132705
90	0.443312	0.313117	0.151801	0.130609
90.2	0.443789	0.314989	0.153062	0.131855
90.4	0.445828	0.316997	0.154635	0.130821
90.6	0.444491	0.316528	0.152755	0.12918
90.8	0.445574	0.317674	0.152964	0.130297
91	0.444789	0.317779	0.153131	0.131572
91.2	0.446543	0.317462	0.153125	0.131853
91.4	0.446016	0.31687	0.152442	0.133831
91.6	0.446694	0.316883	0.152746	0.135213
91.8	0.44518	0.314339	0.151372	0.13175
92	0.446774	0.31531	0.153102	0.131176
92.2	0.446273	0.316182	0.154001	0.128818
92.4	0.447334	0.317341	0.153496	0.129055
92.6	0.445994	0.317364	0.152828	0.12927
92.8	0.446991	0.318188	0.155371	0.132438
93	0.445624	0.316687	0.154253	0.132716
93.2	0.443801	0.314976	0.151303	0.133366
93.4	0.442824	0.313707	0.151104	0.132718
93.6	0.444919	0.316101	0.1552	0.134091
93.8	0.444617	0.317293	0.15325	0.133961
94	0.445811	0.319828	0.153855	0.13517
94.2	0.446066	0.319703	0.155264	0.135455
94.4	0.445828	0.319902	0.15568	0.135719
94.6	0.445661	0.318421	0.152996	0.134883
94.8	0.447611	0.318332	0.152923	0.135063
95	0.446418	0.316854	0.152175	0.133529
95.2	0.447026	0.317207	0.151846	0.133104
95.4	0.449014	0.31801	0.151776	0.133761
95.6	0.448235	0.319113	0.153653	0.133221
95.8	0.446074	0.319951	0.155116	0.132514
96	0.449116	0.320165	0.155379	0.135028
96.2	0.448702	0.320485	0.155959	0.135932
96.4	0.447284	0.320962	0.155966	0.136928
96.6	0.449265	0.322924	0.155424	0.138838
96.8	0.450253	0.323327	0.154851	0.140242
97	0.448778	0.324064	0.155684	0.13955
97.2	0.449596	0.325788	0.156622	0.141695
97.4	0.447522	0.325543	0.155991	0.140576
97.6	0.445855	0.322783	0.153857	0.139663
97.8	0.446583	0.321411	0.154174	0.139466
98	0.446097	0.322613	0.156743	0.140055
98.2	0.445774	0.321385	0.157119	0.138437
98.4	0.446788	0.320757	0.156776	0.136656
98.6	0.447042	0.321142	0.157021	0.135258
98.8	0.446082	0.321343	0.156823	0.134743
99	0.44858	0.321016	0.155054	0.134298
99.2	0.450418	0.321887	0.153733	0.134299
99.4	0.450559	0.322103	0.153968	0.135123
99.6	0.450126	0.321721	0.154705	0.136762
99.8	0.451269	0.321767	0.154727	0.136464
100	0.450383	0.321873	0.154467	0.13703
100.2	0.448505	0.321701	0.155134	0.137851
100.4	0.447607	0.321712	0.155441	0.13837
100.6	0.450217	0.323433	0.155264	0.137906
100.8	0.448056	0.324109	0.154974	0.137684
101	0.446296	0.32275	0.153442	0.137208
101.2	0.44563	0.322064	0.151791	0.13502
101.4	0.447752	0.322617	0.151258	0.135188
101.6	0.445345	0.321047	0.152162	0.135376
101.8	0.446748	0.321425	0.152854	0.136723
102	0.448726	0.323182	0.154091	0.136177
102.2	0.449472	0.324207	0.154649	0.137186
102.4	0.451508	0.3258	0.157104	0.139489
102.6	0.45156	0.324873	0.154841	0.138524
102.8	0.45086	0.324335	0.153534	0.136927
103	0.448873	0.322794	0.153665	0.136495
103.2	0.448578	0.322995	0.152665	0.136123
103.4	0.446821	0.322831	0.151551	0.13532
103.6	0.448252	0.323918	0.152614	0.135649
103.8	0.448668	0.324368	0.152085	0.136721
104	0.451232	0.325935	0.151616	0.137665
104.2	0.451253	0.32568	0.152833	0.138644
104.4	0.453402	0.327084	0.153387	0.139518
104.6	0.453719	0.327508	0.154588	0.140599
104.8	0.454754	0.328161	0.157193	0.141396
105	0.454815	0.329004	0.157574	0.141608
105.2	0.454549	0.329316	0.15748	0.14156
105.4	0.452259	0.328983	0.156491	0.13998
105.6	0.450388	0.32936	0.155767	0.137073
105.8	0.450694	0.331336	0.155745	0.136988
106	0.449914	0.329863	0.155064	0.136307
106.2	0.450937	0.330279	0.155941	0.135212
106.4	0.45135	0.329095	0.156175	0.13657
106.6	0.452641	0.329097	0.154436	0.138987
106.8	0.454193	0.32912	0.15567	0.139573
107	0.454617	0.331055	0.158278	0.140499
107.2	0.453912	0.331834	0.157873	0.142141
107.4	0.453197	0.333143	0.156474	0.141464
107.6	0.453091	0.333168	0.159578	0.141902
107.8	0.448927	0.331004	0.156094	0.141321
108	0.449466	0.330745	0.154686	0.141635
108.2	0.45084	0.330536	0.156372	0.14129
108.4	0.452543	0.329192	0.158235	0.140752
108.6	0.452665	0.329053	0.157191	0.14057
108.8	0.455825	0.330552	0.159667	0.141047
109	0.45558	0.331263	0.159314	0.141022
109.2	0.456468	0.332252	0.158978	0.142821
109.4	0.454825	0.331516	0.158358	0.142671
109.6	0.454622	0.331877	0.155987	0.142803
109.8	0.453847	0.331036	0.154512	0.143556
110	0.453977	0.330566	0.154931	0.142367
110.2	0.453849	0.330099	0.155572	0.142396
110.4	0.455064	0.33249	0.1551	0.143079
110.6	0.45622	0.335619	0.158624	0.145122
110.8	0.454962	0.334161	0.15811	0.142838
111	0.454474	0.333177	0.155306	0.143113
111.2	0.453417	0.332086	0.153776	0.140483
111.4	0.455197	0.33133	0.155067	0.140286
111.6	0.45378	0.32807	0.153559	0.136843
111.8	0.455412	0.33095	0.156221	0.137619
112	0.455035	0.331108	0.158768	0.137611
112.2	0.456344	0.33194	0.158235	0.13917
112.4	0.454518	0.330813	0.157933	0.13867
112.6	0.456041	0.332024	0.157366	0.139801
112.8	0.456867	0.332676	0.156758	0.140042
113	0.458164	0.333474	0.157239	0.140784
113.2	0.457256	0.334327	0.157821	0.141246
113.4	0.457611	0.336728	0.157812	0.142656
113.6	0.456879	0.337813	0.159198	0.142966
113.8	0.455322	0.335584	0.15998	0.142383
114	0.455622	0.336473	0.158363	0.142492
114.2	0.456321	0.336211	0.15988	0.14227
114.4	0.456222	0.335156	0.159361	0.14155
114.6	0.457477	0.33362	0.158758	0.141404
114.8	0.455663	0.334956	0.156334	0.141523
115	0.4566	0.336193	0.15859	0.141865
115.2	0.45579	0.335319	0.156724	0.13976
115.4	0.457073	0.336499	0.158533	0.140159
115.6	0.457313	0.338375	0.159003	0.141818
115.8	0.460102	0.33967	0.162106	0.142244
116	0.458686	0.337108	0.160624	0.141344
116.2	0.459262	0.337817	0.159958	0.142318
116.4	0.460811	0.338823	0.159407	0.143252
116.6	0.459182	0.33785	0.158388	0.141099
116.8	0.459579	0.337052	0.156768	0.141804
117	0.4588	0.337886	0.156237	0.141809
117.2	0.459483	0.34065	0.160006	0.144166
117.4	0.45868	0.340059	0.160781	0.144146
117.6	0.460369	0.342143	0.160351	0.144798
117.8	0.460355	0.342479	0.159592	0.144831
118	0.460609	0.343388	0.1603	0.146042
118.2	0.461329	0.343336	0.158102	0.146702
118.4	0.46084	0.343253	0.158425	0.147974
118.6	0.459395	0.342076	0.158776	0.147536
118.8	0.46053	0.342378	0.1599	0.148533
119	0.464219	0.343969	0.162567	0.149954
119.2	0.462556	0.340956	0.161168	0.148121
119.4	0.460372	0.340863	0.158628	0.144942
119.6	0.461902	0.340829	0.159389	0.14676
119.8	0.459784	0.340209	0.158977	0.144658
120	0.457597	0.338651	0.157232	0.143195
120.2	0.457755	0.341237	0.15972	0.143212
120.4	0.458377	0.340975	0.159658	0.144009
120.6	0.456614	0.339353	0.159438	0.142822
120.8	0.455865	0.339054	0.159742	0.144671
121	0.455795	0.339311	0.15842	0.14402
121.2	0.458226	0.340131	0.158109	0.14612
121.4	0.460073	0.341358	0.160135	0.148068
121.6	0.462386	0.3445	0.160038	0.147516
121.8	0.463053	0.344616	0.158902	0.146492
122	0.462768	0.3453	0.160113	0.148655
122.2	0.460064	0.343859	0.15861	0.14688
122.4	0.458813	0.343553	0.158286	0.145678
122.6	0.456947	0.339741	0.158433	0.145023
122.8	0.458289	0.341836	0.160256	0.146502
123	0.455891	0.340834	0.158755	0.141833
123.2	0.456439	0.341685	0.159007	0.142268
123.4	0.456116	0.34088	0.15847	0.139939
123.6	0.457085	0.344969	0.158921	0.14251
123.8	0.457551	0.344674	0.159066	0.142868
124	0.456496	0.342784	0.157561	0.143995
124.2	0.455732	0.341607	0.157724	0.143494
124.4	0.456915	0.344658	0.158753	0.147711
124.6	0.456317	0.342866	0.157446	0.14576
124.8	0.455659	0.342276	0.156187	0.144558
125	0.457444	0.344136	0.159393	0.146748
125.2	0.458516	0.3468	0.161184	0.147712
125.4	0.458466	0.346847	0.160318	0.14505
125.6	0.458367	0.346168	0.161409	0.145944
125.8	0.45796	0.346214	0.160769	0.147064
126	0.460892	0.347539	0.161896	0.147021
126.2	0.460025	0.345276	0.159957	0.147502
126.4	0.460277	0.344059	0.160836	0.149013
126.6	0.45984	0.344717	0.160658	0.149636
126.8	0.459677	0.345082	0.162205	0.149323
127	0.459765	0.344357	0.161702	0.149046
127.2	0.460048	0.343643	0.161223	0.148095
127.4	0.460581	0.344087	0.161099	0.150033
127.6	0.464755	0.346318	0.162532	0.151283
127.8	0.465855	0.346913	0.161911	0.14932
128	0.466648	0.349979	0.163345	0.151785
128.2	0.465862	0.349975	0.162686	0.151406
128.4	0.466448	0.350784	0.163428	0.150893
128.6	0.463128	0.350719	0.161912	0.149314
128.8	0.462599	0.350888	0.163017	0.152194
129	0.460265	0.347297	0.159376	0.150355
129.2	0.463751	0.349386	0.16201	0.152253
129.4	0.462145	0.349111	0.161258	0.151409
129.6	0.460033	0.347562	0.16018	0.150933
129.8	0.460606	0.348577	0.160762	0.14986
130	0.460251	0.350241	0.160534	0.151032
130.2	0.45825	0.349505	0.16002	0.150581
130.4	0.458114	0.348543	0.158587	0.150129
130.6	0.46106	0.349407	0.160987	0.151724
130.8	0.460815	0.350009	0.160629	0.151529
131	0.461738	0.349183	0.161278	0.14974
131.2	0.460523	0.348529	0.161783	0.149423
131.4	0.460235	0.34844	0.162538	0.149132
131.6	0.460871	0.350048	0.162467	0.149517
131.8	0.461305	0.348503	0.161753	0.15024
132	0.460902	0.349362	0.162305	0.151519
132.2	0.463002	0.350144	0.160964	0.151873
132.4	0.464587	0.351629	0.161817	0.15219
132.6	0.46411	0.350811	0.160787	0.151985
132.8	0.465313	0.351996	0.160285	0.152417
133	0.466593	0.353733	0.161438	0.151643
133.2	0.46607	0.355177	0.162886	0.152031
133.4	0.464824	0.354449	0.162617	0.150366
133.6	0.46382	0.354152	0.162039	0.148533
133.8	0.464605	0.355903	0.164746	0.148707
134	0.462411	0.355311	0.163787	0.149141
134.2	0.462666	0.353282	0.163028	0.149293
134.4	0.463492	0.352594	0.161901	0.150358
134.6	0.466713	0.353381	0.163347	0.151267
134.8	0.465989	0.3535	0.16281	0.15275
135	0.467475	0.352755	0.162742	0.151875
135.2	0.469417	0.355174	0.164235	0.151658
135.4	0.469357	0.356464	0.16661	0.152873
135.6	0.466212	0.356576	0.164436	0.153888
135.8	0.46628	0.354836	0.163295	0.152724
136	0.468201	0.35677	0.162698	0.154698
136.2	0.465961	0.355383	0.161621	0.1535
136.4	0.467546	0.356268	0.160869	0.152728
136.6	0.466609	0.355357	0.161402	0.150726
136.8	0.465458	0.354569	0.158965	0.149684
137	0.463386	0.352793	0.158604	0.147472
137.2	0.463033	0.352529	0.157851	0.148714
137.4	0.461813	0.351974	0.157128	0.148441
137.6	0.463454	0.352258	0.158221	0.149596
137.8	0.463067	0.353543	0.161581	0.149994
138	0.462736	0.354112	0.161584	0.151756
138.2	0.461931	0.353367	0.161762	0.150655
138.4	0.461727	0.352033	0.160415	0.149494
138.6	0.462238	0.353447	0.160976	0.149396
138.8	0.463143	0.352793	0.159434	0.151023
139	0.464116	0.352918	0.160658	0.15131
139.2	0.465527	0.354401	0.161627	0.152435
139.4	0.466326	0.357083	0.164956	0.157137
139.6	0.467268	0.357725	0.165965	0.158851
139.8	0.469282	0.359323	0.166047	0.157368
140	0.467747	0.360237	0.165701	0.155498
140.2	0.467879	0.361061	0.164866	0.154935
140.4	0.467837	0.360369	0.163633	0.154456
140.6	0.467481	0.360121	0.16224	0.153069
140.8	0.463128	0.358496	0.160792	0.153256
141	0.465448	0.359854	0.161823	0.15501
141.2	0.466232	0.360353	0.163451	0.155655
141.4	0.463768	0.358546	0.162192	0.152334
141.6	0.46334	0.357663	0.160768	0.152512
141.8	0.464776	0.356407	0.16229	0.151451
142	0.464417	0.35703	0.161634	0.150403
142.2	0.462691	0.356013	0.159627	0.150233
142.4	0.465728	0.359134	0.161595	0.152703
142.6	0.465162	0.360563	0.163608	0.15195
142.8	0.466369	0.364763	0.165788	0.15367
143	0.465898	0.362624	0.16661	0.153369
143.2	0.463977	0.360545	0.165951	0.151761
143.4	0.463721	0.35781	0.165248	0.150779
143.6	0.463522	0.358243	0.165521	0.151442
143.8	0.463018	0.355546	0.16315	0.150026
144	0.464061	0.356233	0.160494	0.151338
144.2	0.467521	0.359119	0.161349	0.153783
144.4	0.46534	0.359268	0.158941	0.153426
144.6	0.466404	0.359247	0.157961	0.15338
144.8	0.4662	0.359772	0.158002	0.15526
145	0.46779	0.362004	0.161241	0.157009
145.2	0.469143	0.362758	0.162576	0.15531
145.4	0.471645	0.366042	0.164479	0.15761
145.6	0.470717	0.364297	0.164253	0.157831
145.8	0.471618	0.366605	0.164657	0.156965
146	0.467218	0.363449	0.162023	0.15502
146.2	0.46751	0.364183	0.163632	0.157514
146.4	0.466506	0.36125	0.162386	0.155685
146.6	0.466537	0.361957	0.162129	0.155952
146.8	0.466915	0.361314	0.163215	0.155904
147	0.467351	0.361646	0.163326	0.155455
147.2	0.466229	0.360766	0.160652	0.153915
147.4	0.467076	0.363493	0.163129	0.155713
147.6	0.466956	0.363989	0.163701	0.156909
147.8	0.465147	0.361608	0.162301	0.157693
148	0.46668	0.363245	0.163075	0.157483
148.2	0.465423	0.362569	0.163834	0.15802
148.4	0.463958	0.36005	0.161652	0.155523
148.6	0.463803	0.357617	0.161941	0.152481
148.8	0.464267	0.360768	0.162279	0.152665
149	0.465618	0.361074	0.164266	0.154213
149.2	0.464911	0.3612	0.162167	0.153831
149.4	0.466611	0.363445	0.165958	0.154699
149.6	0.468141	0.366749	0.167134	0.158004
149.8	0.468789	0.365504	0.168434	0.156755
150	0.43808	0.338139	0.133547	0.121631
150.2	0.419656	0.338579	0.135943	0.120652
150.4	0.404112	0.337222	0.134636	0.12186
150.6	0.38221	0.328876	0.128528	0.117546
150.8	0.36325	0.32578	0.125347	0.117907
151	0.346525	0.323008	0.123962	0.117568
151.2	0.330922	0.319788	0.122145	0.117535
151.4	0.31529	0.316626	0.120316	0.11703
151.6	0.300963	0.314161	0.118442	0.116462
151.8	0.289598	0.31239	0.117751	0.11683
152	0.278102	0.310748	0.114747	0.115679
152.2	0.267458	0.308598	0.113005	0.114805
152.4	0.258767	0.307469	0.11191	0.114401
152.6	0.251395	0.307828	0.112584	0.115785
152.8	0.243601	0.306254	0.111416	0.11509
153	0.236968	0.304669	0.111838	0.116137
153.2	0.230075	0.303716	0.110324	0.115778
153.4	0.223974	0.302961	0.110794	0.116648
153.6	0.216656	0.300042	0.108111	0.11476
153.8	0.211944	0.299494	0.108444	0.114707
154	0.206319	0.298301	0.108119	0.113355
154.2	0.201914	0.297318	0.108531	0.112803
154.4	0.198545	0.297032	0.107632	0.112929
154.6	0.194955	0.296432	0.1081	0.112687
154.8	0.18998	0.296238	0.106851	0.112704
155	0.186493	0.29643	0.106499	0.113217
155.2	0.184283	0.297323	0.106756	0.115318
155.4	0.180333	0.295969	0.106302	0.114519
155.6	0.177743	0.29626	0.106431	0.115305
155.8	0.177096	0.296304	0.106926	0.115661
156	0.174487	0.295799	0.107168	0.11468
156.2	0.170895	0.294528	0.10569	0.114013
156.4	0.167964	0.294393	0.104447	0.112655
156.6	0.16571	0.293812	0.104084	0.112446
156.8	0.162255	0.293336	0.102823	0.111195
157	0.160536	0.293002	0.10275	0.111764
157.2	0.158122	0.292374	0.103137	0.11069
157.4	0.156254	0.292229	0.103171	0.111856
157.6	0.154884	0.292941	0.103017	0.112237
157.8	0.1523	0.291081	0.101197	0.111522
158	0.149901	0.290588	0.0999185	0.110828
158.2	0.149065	0.290419	0.0994795	0.110292
158.4	0.147542	0.289587	0.0994025	0.110127
158.6	0.145847	0.289184	0.0988315	0.109237
158.8	0.145135	0.289355	0.100045	0.109399
159	0.144471	0.289187	0.101534	0.109
159.2	0.143004	0.288647	0.100858	0.108853
159.4	0.140698	0.287791	0.0999135	0.107119
159.6	0.139419	0.287414	0.100159	0.107314
159.8	0.138677	0.288463	0.101031	0.108546
160	0.136908	0.287872	0.099259	0.108683
160.2	0.134517	0.287123	0.099391	0.107881
160.4	0.13383	0.287399	0.0992185	0.108502
160.6	0.133598	0.28787	0.099568	0.109506
160.8	0.132397	0.287316	0.098422	0.108766
161	0.131483	0.287344	0.0980415	0.108427
161.2	0.131648	0.288892	0.0979275	0.110212
161.4	0.130627	0.287543	0.097299	0.109529
161.6	0.127011	0.284764	0.094928	0.107364
161.8	0.124801	0.283799	0.094087	0.106514
162	0.123758	0.28278	0.0941145	0.105442
162.2	0.122436	0.282118	0.094725	0.104916
162.4	0.121947	0.282535	0.094687	0.105522
162.6	0.121012	0.281857	0.0939255	0.104218
162.8	0.122652	0.283635	0.095966	0.105813
163	0.122229	0.28477	0.096403	0.107259
163.2	0.121022	0.28281	0.0937685	0.105925
163.4	0.120359	0.2829	0.0946105	0.104888
163.6	0.121011	0.284289	0.096111	0.107046
163.8	0.119115	0.282857	0.094392	0.106163
164	0.118062	0.281967	0.0931245	0.105788
164.2	0.117721	0.283026	0.0937835	0.105996
164.4	0.116706	0.2826	0.092382	0.106919
164.6	0.116243	0.282587	0.091686	0.106122
164.8	0.115089	0.282139	0.091836	0.106324
165	0.114966	0.282246	0.0925405	0.10659
165.2	0.114309	0.282509	0.0925145	0.107429
165.4	0.113822	0.282133	0.092614	0.106397
165.6	0.112428	0.281581	0.092283	0.106864
165.8	0.112824	0.281508	0.0923945	0.10686
166	0.111197	0.280486	0.0918595	0.106262
166.2	0.109862	0.279664	0.0917015	0.105499
166.4	0.108629	0.279413	0.092227	0.106092
166.6	0.107835	0.279515	0.0923765	0.105544
166.8	0.106496	0.279519	0.092096	0.104858
167	0.105404	0.278929	0.091125	0.104076
167.2	0.106095	0.279336	0.092031	0.104987
167.4	0.106768	0.279894	0.0916895	0.105608
167.6	0.106486	0.27923	0.0913775	0.105485
167.8	0.107397	0.279102	0.0924025	0.106813
168	0.108729	0.281334	0.0937205	0.108447
168.2	0.108152	0.281023	0.093303	0.107893
168.4	0.107444	0.281115	0.0939175	0.107253
168.6	0.107735	0.28177	0.094881	0.107469
168.8	0.105916	0.281846	0.0936135	0.106728
169	0.104792	0.27972	0.0924635	0.105863
169.2	0.103477	0.278581	0.092328	0.105269
169.4	0.10304	0.278529	0.0915	0.105679
169.6	0.102315	0.278037	0.0909325	0.106033
169.8	0.101374	0.277328	0.090503	0.104911
170	0.0998405	0.276763	0.090089	0.103375
170.2	0.100922	0.278423	0.0904995	0.104595
170.4	0.099313	0.277099	0.0897635	0.103442
170.6	0.097717	0.276593	0.089083	0.102538
170.8	0.098046	0.275917	0.0896655	0.103231
171	0.099036	0.277649	0.0904745	0.105291
171.2	0.0973035	0.275378	0.089325	0.103691
171.4	0.0995385	0.277545	0.090485	0.105951
171.6	0.100456	0.278629	0.0909285	0.106693
171.8	0.100662	0.279718	0.0906435	0.107118
172	0.100654	0.279841	0.091975	0.107503
172.2	0.100566	0.280716	0.0923485	0.107635
172.4	0.098759	0.279114	0.091367	0.106119
172.6	0.098012	0.278331	0.091869	0.10552
172.8	0.097089	0.277527	0.0921985	0.105359
173	0.095831	0.276786	0.090305	0.104025
173.2	0.0967335	0.277281	0.0908075	0.105953
173.4	0.0956075	0.277024	0.089737	0.1047
173.6	0.094738	0.276309	0.088754	0.10504
173.8	0.0947275	0.277251	0.0882265	0.104973
174	0.094863	0.276352	0.0882065	0.105247
174.2	0.0941625	0.276566	0.087717	0.104358
174.4	0.0945795	0.276556	0.0890695	0.1052
174.6	0.094597	0.276701	0.0893505	0.105038
174.8	0.0946185	0.276465	0.090396	0.105707
175	0.0928645	0.275997	0.0899085	0.104561
175.2	0.0914355	0.274782	0.088549	0.103621
175.4	0.0912545	0.275285	0.0882375	0.103928
175.6	0.0921075	0.27628	0.0878155	0.104646
175.8	0.0923775	0.276342	0.086435	0.104033
176	0.094066	0.27784	0.08788	0.105088
176.2	0.095372	0.279176	0.0886725	0.105453
176.4	0.0956075	0.279186	0.088688	0.105017
176.6	0.0950005	0.278655	0.088852	0.10452
176.8	0.0937485	0.278109	0.0886965	0.104224
177	0.092477	0.276543	0.086706	0.103346
177.2	0.0912175	0.274845	0.0860575	0.102137
177.4	0.090599	0.27531	0.086726	0.103631
177.6	0.0903085	0.275045	0.086409	0.103305
177.8	0.090522	0.274576	0.0867785	0.103316
178	0.090668	0.275815	0.088251	0.10462
178.2	0.090818	0.27672	0.089039	0.106059
178.4	0.0901985	0.275908	0.0881705	0.104282
178.6	0.090243	0.276832	0.088598	0.104844
178.8	0.089089	0.276487	0.087455	0.103919
179	0.0886315	0.276259	0.0869255	0.103684
179.2	0.0888545	0.275888	0.0874825	0.103456
179.4	0.088593	0.274797	0.08661	0.10329
179.6	0.087764	0.273786	0.087212	0.103815
179.8	0.087773	0.273705	0.0874515	0.103239
180	0.088671	0.273628	0.087311	0.102326
180.2	0.087844	0.27379	0.085968	0.102494
180.4	0.0880655	0.274603	0.086985	0.103471
180.6	0.0882485	0.273907	0.086822	0.102271
180.8	0.0877085	0.273919	0.086833	0.103156
181	0.0867515	0.274122	0.0872205	0.104183
181.2	0.0868535	0.273695	0.0879895	0.103912
181.4	0.086058	0.273259	0.0879055	0.102877
181.6	0.08634	0.274016	0.0872735	0.103339
181.8	0.0862725	0.273863	0.086874	0.10366
182	0.086414	0.27318	0.085977	0.102974
182.2	0.085634	0.273015	0.0858905	0.10206
182.4	0.0863635	0.274247	0.085959	0.102769
182.6	0.087087	0.274274	0.086086	0.102935
182.8	0.088219	0.274894	0.0868615	0.102803
183	0.0881391	0.275322	0.0880126	0.103647
183.2	0.0888408	0.27504	0.0877508	0.104622
183.4	0.0887105	0.273853	0.0874875	0.104171
183.6	0.0879235	0.273975	0.0870215	0.104026
183.8	0.08684	0.273224	0.0867585	0.104424
184	0.086427	0.27366	0.085956	0.103544
184.2	0.0856985	0.273643	0.086082	0.103725
184.4	0.0846595	0.273027	0.085924	0.103323
184.6	0.0844755	0.272472	0.0860615	0.103205
184.8	0.084325	0.272583	0.085215	0.101819
185	0.084172	0.272253	0.0849125	0.101931
185.2	0.0843565	0.272525	0.0847025	0.101159
185.4	0.084879	0.27383	0.084024	0.102291
185.6	0.083211	0.273193	0.083291	0.100834
185.8	0.0831215	0.273343	0.0841505	0.100874
186	0.0828295	0.273286	0.084631	0.100861
186.2	0.081337	0.272315	0.0835555	0.100746
186.4	0.0803145	0.271062	0.0838765	0.0995565
186.6	0.08057	0.271514	0.0842255	0.100192
186.8	0.0804165	0.271719	0.083794	0.101628
187	0.08002	0.271244	0.0840215	0.101488
187.2	0.0804845	0.271952	0.084386	0.101433
187.4	0.0802645	0.272012	0.084033	0.1012
187.6	0.081756	0.272805	0.084736	0.103277
187.8	0.0822615	0.272585	0.084725	0.103057
188	0.082895	0.272902	0.084362	0.10328
188.2	0.0839012	0.273803	0.0850567	0.104523
188.4	0.0848685	0.273981	0.0860405	0.104944
188.6	0.0835303	0.27383	0.0861938	0.10402
188.8	0.0828925	0.273648	0.087148	0.103134
189	0.0821877	0.273306	0.0867977	0.102605
189.2	0.0815618	0.272007	0.0857378	0.101233
189.4	0.0805761	0.271821	0.0850636	0.10073
189.6	0.080535	0.27084	0.084291	0.0998685
189.8	0.080412	0.270627	0.083739	0.100049
190	0.0807291	0.269917	0.0839731	0.100231
190.2	0.0809096	0.269989	0.0853676	0.100143
190.4	0.0810164	0.270519	0.0847284	0.100914
190.6	0.0817083	0.270953	0.0845538	0.10166
190.8	0.0809258	0.270426	0.0830968	0.100476
191	0.080888	0.270763	0.082554	0.0999185
191.2	0.080569	0.270859	0.0815285	0.100353
191.4	0.0808612	0.270994	0.0818852	0.100473
191.6	0.0796875	0.270232	0.081499	0.0991165
191.8	0.0808785	0.271544	0.0831565	0.100973
192	0.0807501	0.271415	0.0835451	0.101724
192.2	0.0808221	0.272747	0.0842536	0.102295
192.4	0.0808791	0.272697	0.0861601	0.102245
192.6	0.0818543	0.273041	0.0865098	0.102706
192.8	0.0813858	0.273095	0.0859458	0.10256
193	0.081042	0.27341	0.0856645	0.102541
193.2	0.0800493	0.272275	0.0849958	0.100764
193.4	0.0800419	0.2723	0.0837469	0.100544
193.6	0.078516	0.271921	0.0835315	0.100322
193.8	0.0780823	0.271335	0.0838468	0.0994558
194	0.0776103	0.27159	0.0837008	0.0988553
194.2	0.0785944	0.271695	0.0848204	0.100021
194.4	0.0790934	0.272312	0.0850199	0.100346
194.6	0.0792809	0.272616	0.0845279	0.0994659
194.8	0.0794794	0.272068	0.0841284	0.0998149
195	0.0796224	0.272425	0.0847224	0.100432
195.2	0.0786362	0.272258	0.0838552	0.0998372
195.4	0.0776757	0.270539	0.0829312	0.0991192
195.6	0.0785177	0.271067	0.0839377	0.100813
195.8	0.0784738	0.271195	0.0833368	0.100089
196	0.0787077	0.270155	0.0827107	0.0995872
196.2	0.0793072	0.270758	0.0824712	0.100599
196.4	0.0796623	0.271814	0.0823838	0.101153
196.6	0.079557	0.271688	0.0819145	0.101202
196.8	0.0790007	0.272202	0.0817632	0.101075
197	0.0786496	0.271763	0.0820531	0.101198
197.2	0.078318	0.270879	0.082486	0.100762
197.4	0.0776621	0.27108	0.0825001	0.10111
197.6	0.0766655	0.270983	0.0820765	0.1006
197.8	0.0780799	0.271917	0.0837359	0.101712
198	0.0782589	0.272619	0.0841224	0.10237
198.2	0.0777672	0.27373	0.0828957	0.101142
198.4	0.0776802	0.273297	0.0830772	0.100463
198.6	0.078132	0.273276	0.0838455	0.101554
198.8	0.074546	0.270357	0.0812425	0.100426
199	0.0747549	0.270493	0.0809604	0.100088
199.2	0.0757911	0.270813	0.0822831	0.102342
199.4	0.075193	0.27059	0.082494	0.101825
199.6	0.0746172	0.270052	0.0818687	0.100306
199.8	0.0769852	0.271554	0.0831327	0.100218
200	0.0763373	0.271291	0.0821648	0.0996913
200.2	0.075281	0.269627	0.0810865	0.0983555
200.4	0.0754417	0.270306	0.0805972	0.0984697
200.6	0.0753948	0.270618	0.0803093	0.0984453
200.8	0.075416	0.271066	0.0810185	0.099364
201	0.0752978	0.271607	0.0812098	0.0999778
201.2	0.0754215	0.271977	0.082357	0.0998015
201.4	0.0759235	0.271392	0.0833475	0.100051
201.6	0.0754517	0.271111	0.0833132	0.0997947
201.8	0.0758197	0.270739	0.0829072	0.0997707
202	0.0764666	0.270886	0.0842646	0.100323
202.2	0.0764505	0.27067	0.0835125	0.100099
202.4	0.0765985	0.270628	0.083037	0.100269
202.6	0.0771855	0.270815	0.083669	0.101449
202.8	0.0760122	0.270172	0.0833292	0.101165
203	0.0752282	0.268815	0.0819982	0.0991902
203.2	0.0747451	0.26857	0.0815201	0.0988091
203.4	0.0739662	0.2676	0.0804817	0.0980997
203.6	0.0738782	0.267787	0.0805842	0.0970927
203.8	0.074799	0.268109	0.079984	0.096917
204	0.0748963	0.268241	0.0801483	0.0978413
204.2	0.0746643	0.269308	0.0811388	0.0989608
204.4	0.0754994	0.269322	0.0816764	0.0995744
204.6	0.0761712	0.269877	0.0819022	0.100576
204.8	0.0755737	0.27016	0.0827127	0.100517
205	0.0743508	0.269106	0.0810228	0.0997403
205.2	0.0745007	0.267813	0.0800447	0.0984477
205.4	0.0732545	0.267332	0.079166	0.097827
205.6	0.0721545	0.26602	0.0776795	0.096421
205.8	0.0720315	0.264846	0.076464	0.096078
206	0.0730934	0.265858	0.0780089	0.0964894
206.2	0.072894	0.26639	0.0777065	0.09701
206.4	0.0728605	0.267486	0.077541	0.0969185
206.6	0.0732633	0.26779	0.0783598	0.0978593
206.8	0.0728562	0.267835	0.0787297	0.0978457
207	0.0734885	0.268382	0.079496	0.0987215
207.2	0.0739262	0.267977	0.0801712	0.0987842
207.4	0.0741393	0.268079	0.0815673	0.0994863
207.6	0.074546	0.269315	0.082308	0.0994555
207.8	0.074173	0.270085	0.0819585	0.099995
208	0.0739055	0.269722	0.080668	0.0992775
208.2	0.0739678	0.270148	0.0806298	0.0994983
208.4	0.075231	0.270608	0.080202	0.099638
208.6	0.0741678	0.268958	0.0785423	0.0994023
208.8	0.0759481	0.269788	0.0797156	0.100165
209	0.0758678	0.269637	0.0795683	0.100026
209.2	0.0757659	0.269528	0.0803369	0.100539
209.4	0.0746484	0.268095	0.0795884	0.0987689
209.6	0.0744398	0.267813	0.0794718	0.0979688
209.8	0.0733344	0.268218	0.0794899	0.0971154
210	0.0731441	0.268093	0.0800481	0.0970251
210.2	0.072139	0.267624	0.0784665	0.095929
210.4	0.0724041	0.268022	0.0789521	0.0973781
210.6	0.0732236	0.269067	0.0804471	0.0986351
210.8	0.0732957	0.267514	0.0796507	0.0984832
211	0.0732311	0.268419	0.0801606	0.0987496
211.2	0.0734671	0.26796	0.0799456	0.0977386
211.4	0.071559	0.267126	0.0784855	0.0967645
211.6	0.070857	0.266892	0.0775975	0.095954
211.8	0.0709075	0.266968	0.0783775	0.097032
212	0.0703259	0.265505	0.0773544	0.0963289
212.2	0.0705284	0.266394	0.0776459	0.0969404
212.4	0.0722739	0.26834	0.0803599	0.0982949
212.6	0.0717292	0.267465	0.0794507	0.0976812
212.8	0.0708753	0.267727	0.0786608	0.0955318
213	0.0706449	0.268136	0.0788094	0.0955229
213.2	0.0707805	0.267654	0.079351	0.096398
213.4	0.069987	0.266535	0.077862	0.095972
213.6	0.0700786	0.267969	0.0791931	0.0958776
213.8	0.0707462	0.267071	0.0789867	0.0969167
214	0.0701797	0.267547	0.0783362	0.0968412
214.2	0.0705452	0.267767	0.0780122	0.0962147
214.4	0.0696346	0.267045	0.0779036	0.0948371
214.6	0.0704471	0.266135	0.0777791	0.0960681
214.8	0.0707956	0.266596	0.0781221	0.0951701
215	0.0717862	0.266054	0.0785872	0.0959082
215.2	0.0718633	0.267172	0.0788853	0.0964268
215.4	0.0732007	0.268508	0.0793292	0.0979947
215.6	0.0731835	0.26933	0.0790515	0.098068
215.8	0.0730949	0.27033	0.0797399	0.0994989
216	0.072891	0.270298	0.0794315	0.099048
216.2	0.0728771	0.269486	0.0795891	0.0991646
216.4	0.0740059	0.269685	0.0803704	0.0995399
216.6	0.0733937	0.268018	0.0794297	0.0990072
216.8	0.0715823	0.265424	0.0761098	0.0965853
217	0.0721928	0.266274	0.0761958	0.0969243
217.2	0.0708835	0.26558	0.075214	0.0963125
217.4	0.0703821	0.264411	0.0750816	0.0965531
217.6	0.0711075	0.26528	0.075943	0.0962785
217.8	0.073038	0.268199	0.079315	0.0992015
218	0.0723644	0.267768	0.0795264	0.0989454
218.2	0.0725729	0.267327	0.0800344	0.0986379
218.4	0.0718926	0.268144	0.0793846	0.0986136
218.6	0.0719526	0.26774	0.0796391	0.0985946
218.8	0.0715666	0.267069	0.0791516	0.0979496
219	0.0708434	0.266421	0.0783999	0.0971614
219.2	0.0710106	0.267673	0.0784226	0.0981181
219.4	0.0710502	0.266745	0.0779212	0.0965722
219.6	0.0696939	0.266246	0.0773964	0.0958574
219.8	0.0694052	0.265716	0.0766627	0.0952782
220	0.0693992	0.265446	0.0774247	0.0957087
220.2	0.0708484	0.266003	0.0783179	0.0957634
220.4	0.0697805	0.265862	0.0774615	0.0951655
220.6	0.071485	0.267655	0.0779245	0.0967665
220.8	0.0716978	0.267866	0.0783933	0.0976828
221	0.0721865	0.268502	0.078707	0.0978
221.2	0.0714146	0.267809	0.0787746	0.0977731
221.4	0.0734296	0.269023	0.0806546	0.100112
221.6	0.072409	0.267238	0.080424	0.0997415
221.8	0.0727589	0.267677	0.0799874	0.0987059
222	0.0721645	0.266539	0.0790155	0.098074
222.2	0.0724635	0.266889	0.0780555	0.098445
222.4	0.0709635	0.265811	0.076433	0.0968435
222.6	0.071754	0.267174	0.076127	0.0973075
222.8	0.0707429	0.265396	0.0750989	0.0960664
223	0.0708249	0.266432	0.0758024	0.0966179
223.2	0.0704971	0.265565	0.0753806	0.0959546
223.4	0.0697972	0.265805	0.0756347	0.0957497
223.6	0.0700668	0.266049	0.0767423	0.0958163
223.8	0.0701903	0.266945	0.0775658	0.0970758
224	0.0697322	0.266046	0.0767642	0.0953737
224.2	0.0694023	0.266395	0.0768293	0.0948528
224.4	0.0695467	0.265272	0.0771217	0.0947972
224.6	0.0689315	0.264009	0.0760345	0.0939555
224.8	0.0695918	0.264462	0.0762873	0.0938818
225	0.0707003	0.265571	0.0775018	0.0963408
225.2	0.0716082	0.265997	0.0785207	0.0971787
225.4	0.0717528	0.267169	0.0787033	0.0974873
225.6	0.0709602	0.267409	0.0772922	0.0972287
225.8	0.069817	0.266825	0.076874	0.096517
226	0.0698003	0.266468	0.0762828	0.0959288
226.2	0.0695653	0.266	0.0756393	0.0958583
226.4	0.0706057	0.265901	0.0748392	0.0952017
226.6	0.0700756	0.265338	0.0756261	0.0945031
226.8	0.0709146	0.264944	0.0757701	0.0953401
227	0.0705262	0.264697	0.0761757	0.0957542
227.2	0.069996	0.265118	0.0754315	0.0945875
227.4	0.06848	0.26401	0.075692	0.0949075
227.6	0.0690731	0.264595	0.0759301	0.0956581
227.8	0.0693974	0.265272	0.0763384	0.0958964
228	0.0700318	0.265761	0.0763603	0.0957703
228.2	0.0697469	0.265125	0.0771389	0.0965524
228.4	0.0697343	0.265878	0.0769003	0.0967953
228.6	0.0711221	0.266714	0.0784631	0.0970916
228.8	0.0701769	0.266738	0.0780679	0.0960979
229	0.0686876	0.265762	0.0767576	0.0947816
229.2	0.0685491	0.265637	0.0767806	0.0942046
229.4	0.0690004	0.265813	0.0771054	0.0945049
229.6	0.0668079	0.263585	0.0748524	0.0936344
229.8	0.0672992	0.263486	0.0750347	0.0946047
230	0.0682887	0.264963	0.0765437	0.0958947
230.2	0.0676187	0.26485	0.0755742	0.0962062
230.4	0.0678289	0.265092	0.0756404	0.0962964
230.6	0.0681741	0.265577	0.0762086	0.0963571
230.8	0.0680256	0.264997	0.0759701	0.0961206
231	0.0680522	0.263888	0.0753712	0.0957902
231.2	0.0696318	0.265184	0.0768818	0.0964693
231.4	0.0703766	0.26481	0.0771501	0.0961681
231.6	0.0716212	0.266602	0.0778717	0.0975477
231.8	0.0715121	0.267015	0.0774516	0.0962561
232	0.0720406	0.267993	0.0779221	0.0962976
232.2	0.0711124	0.267534	0.0763369	0.0953179
232.4	0.0714246	0.268439	0.0760981	0.0954531
232.6	0.0701781	0.267494	0.0756616	0.0948036
232.8	0.0709461	0.267316	0.0756191	0.0957261
233	0.0686215	0.265898	0.074105	0.0946875
233.2	0.0689384	0.265761	0.0747189	0.0945859
233.4	0.0691229	0.265564	0.0758324	0.0951939
233.6	0.0687875	0.264752	0.0758135	0.093951
233.8	0.0678217	0.263895	0.0751122	0.0927532
234	0.069507	0.264302	0.0759485	0.093148
234.2	0.0689137	0.263757	0.0750822	0.0929407
234.4	0.066838	0.262036	0.073427	0.0903315
234.6	0.0673003	0.262521	0.0737993	0.0908428
234.8	0.0676373	0.263866	0.0747213	0.0926183
235	0.0681921	0.265352	0.0754496	0.0933101
235.2	0.0675947	0.264909	0.0761397	0.0936167
235.4	0.0691553	0.266593	0.0768243	0.0955908
235.6	0.0683525	0.265956	0.0757435	0.0951
235.8	0.0686054	0.265299	0.0762024	0.0947564
236	0.0669207	0.263974	0.0749852	0.0940532
236.2	0.0685956	0.265382	0.0759861	0.0957526
236.4	0.06831	0.264482	0.076809	0.0957565
236.6	0.0704229	0.266289	0.0785179	0.0975989
236.8	0.0707459	0.26754	0.0790469	0.0981614
237	0.0714976	0.267628	0.0789336	0.0982246
237.2	0.0713035	0.267176	0.078425	0.096671
237.4	0.0718773	0.267192	0.0775618	0.0973033
237.6	0.0701606	0.266804	0.0769021	0.0963896
237.8	0.0698685	0.265421	0.076113	0.0954185
238	0.0698982	0.265088	0.0762892	0.0953702
238.2	0.0697647	0.26493	0.0759792	0.0957877
238.4	0.0687972	0.265097	0.0752122	0.0939212
238.6	0.069484	0.26484	0.075204	0.094806
238.8	0.0689717	0.265121	0.0751607	0.0948427
239	0.0679247	0.264068	0.0740532	0.0947817
239.2	0.0675139	0.2631	0.0738749	0.0937894
239.4	0.068018	0.263246	0.0742945	0.094919
239.6	0.0687965	0.263349	0.073995	0.0946845
239.8	0.0693723	0.262924	0.0740288	0.0947353
240	0.0706138	0.264334	0.0759508	0.0949753
240.2	0.0707987	0.266037	0.0770367	0.0966482
240.4	0.0708101	0.265581	0.0775671	0.0964381
240.6	0.0699638	0.26452	0.0772478	0.0956333
240.8	0.069225	0.264176	0.0769175	0.095642
241	0.0689285	0.263548	0.0759275	0.0955485
241.2	0.0681823	0.262204	0.0746633	0.0940998
241.4	0.0681803	0.262572	0.0742603	0.0946133
241.6	0.0683616	0.264091	0.0749686	0.0946666
241.8	0.06863	0.264199	0.0746735	0.0938925
242	0.0696548	0.265392	0.0762008	0.0939503
242.2	0.0707336	0.265522	0.0768871	0.0945996
242.4	0.0705635	0.265469	0.076732	0.0937435
242.6	0.069046	0.263794	0.0756265	0.0928455
242.8	0.0685136	0.264348	0.0757421	0.0932766
243	0.0679134	0.263491	0.0747464	0.0936944
243.2	0.066592	0.263571	0.0742115	0.0927605
243.4	0.0678391	0.263871	0.0752991	0.0937981
243.6	0.0693721	0.265137	0.0757016	0.0948876
243.8	0.0703944	0.264131	0.0757609	0.0946269
244	0.0698222	0.264259	0.0755997	0.0945612
244.2	0.0708249	0.264299	0.0760069	0.0953999
244.4	0.0699938	0.263908	0.0747468	0.0949413
244.6	0.0701371	0.263504	0.0747256	0.0947266
244.8	0.069913	0.265129	0.0751815	0.095464
245	0.0698368	0.265253	0.0753288	0.0955848
245.2	0.0692069	0.264362	0.0745554	0.0942109
245.4	0.0695662	0.265508	0.0755107	0.0943722
245.6	0.0693544	0.265099	0.0755789	0.0948154
245.8	0.0683764	0.263558	0.0742799	0.0937884
246	0.06838	0.262755	0.0734965	0.0935055
246.2	0.0689697	0.26328	0.0736352	0.0939167
246.4	0.067385	0.261707	0.072151	0.0930695
246.6	0.0671588	0.261722	0.0726418	0.0928313
246.8	0.0675718	0.262662	0.0735348	0.0928548
247	0.0684429	0.263673	0.0742509	0.0933899
247.2	0.0679039	0.263513	0.0744039	0.0937474
247.4	0.0687022	0.264107	0.0744997	0.0946072
247.6	0.0681403	0.263782	0.0734188	0.0934428
247.8	0.0684189	0.263396	0.0734169	0.0939904
248	0.0677267	0.263617	0.0735037	0.0940362
248.2	0.0682164	0.263623	0.0731869	0.0947529
248.4	0.0674505	0.263383	0.0738175	0.0948795
248.6	0.0681849	0.263701	0.0739084	0.0953149
248.8	0.0679374	0.263351	0.0743349	0.0960279
249	0.0691128	0.262969	0.0741738	0.0955363
249.2	0.0697768	0.264421	0.0757438	0.0959683
249.4	0.0710924	0.265199	0.0760184	0.0956794
249.6	0.0699293	0.264685	0.0763863	0.0956133
249.8	0.0690447	0.264203	0.0750132	0.0938487
250	0.0672282	0.263608	0.0741737	0.0932987
250.2	0.0681202	0.263412	0.0740482	0.0935642
250.4	0.0688518	0.264202	0.0745198	0.0945058
250.6	0.0701733	0.265313	0.0749848	0.0958328
250.8	0.0722727	0.267295	0.0766417	0.0970912
251	0.0732039	0.26699	0.0768654	0.0974269
251.2	0.0721881	0.266816	0.0766446	0.0973606
251.4	0.0701934	0.264997	0.0754044	0.0963449
251.6	0.0693852	0.263366	0.0752202	0.0958252
251.8	0.0694571	0.263613	0.0752536	0.0967066
252	0.069259	0.264505	0.075866	0.097212
252.2	0.0688687	0.264345	0.0755107	0.0972452
252.4	0.0691234	0.264076	0.0757274	0.0967814
252.6	0.0697575	0.264874	0.076181	0.0968875
252.8	0.0692977	0.263658	0.0752157	0.0956677
253	0.0678455	0.262253	0.073776	0.094237
253.2	0.0675944	0.262082	0.0730574	0.0932349
253.4	0.0673614	0.261863	0.0731964	0.0933809
253.6	0.0671276	0.261881	0.0726296	0.0924151
253.8	0.0664701	0.261745	0.0727501	0.0927736
254	0.0681624	0.262445	0.0742859	0.0934614
254.2	0.0678734	0.261478	0.0743504	0.0932034
254.4	0.0696287	0.263416	0.0752732	0.0939567
254.6	0.0683763	0.262506	0.0744368	0.0939113
254.8	0.0690108	0.263342	0.0749848	0.0948373
255	0.069105	0.264363	0.074887	0.0951855
255.2	0.0695145	0.265298	0.075677	0.0961145
255.4	0.0686019	0.264026	0.0745174	0.0955124
255.6	0.0704177	0.264814	0.0761672	0.0965617
255.8	0.0691955	0.264134	0.07531	0.095213
256	0.0690463	0.263437	0.0751843	0.0954323
256.2	0.0687616	0.263232	0.0749436	0.0951191
256.4	0.0683828	0.262638	0.0751303	0.0956383
256.6	0.0668067	0.262547	0.0735982	0.0946382
256.8	0.0679943	0.26264	0.0739623	0.0956963
257	0.0680034	0.263393	0.0741669	0.0959484
257.2	0.0694861	0.263005	0.0739461	0.0960141
257.4	0.0694062	0.263481	0.0738602	0.0957477
257.6	0.0711164	0.264506	0.0749184	0.0973374
257.8	0.0708083	0.264485	0.0744098	0.0968093
258	0.0694376	0.263618	0.0738476	0.0962401
258.2	0.0687751	0.264402	0.0739991	0.0969756
258.4	0.0696868	0.265247	0.0750718	0.0974913
258.6	0.0693696	0.264636	0.0742996	0.0970836
258.8	0.069197	0.264443	0.074164	0.0967315
259	0.0713634	0.264646	0.0746369	0.0973059
259.2	0.0708492	0.263884	0.0744657	0.0966292
259.4	0.0711427	0.26391	0.0738647	0.0966532
259.6	0.0722516	0.264541	0.0754376	0.0965056
259.8	0.0718374	0.263866	0.0756039	0.0967849
260	0.0709518	0.263879	0.0750583	0.0957718
260.2	0.0712352	0.263819	0.0748772	0.0953057
260.4	0.0705323	0.262513	0.0739833	0.0949378
260.6	0.0691817	0.261711	0.0735897	0.0943087
260.8	0.0701475	0.262896	0.074721	0.094436
261	0.069574	0.262848	0.0745185	0.094871
261.2	0.0700568	0.263131	0.0757523	0.0962008
261.4	0.0708215	0.264505	0.077367	0.09648
261.6	0.0703469	0.264258	0.0763254	0.0973119
261.8	0.0707506	0.263627	0.0767726	0.0973461
262	0.0722982	0.264477	0.0770607	0.0984432
262.2	0.0719599	0.264232	0.0761979	0.0980819
262.4	0.0708469	0.263384	0.0755869	0.0978994
262.6	0.0709823	0.263457	0.0749433	0.0969388
262.8	0.0702364	0.263735	0.0737469	0.0970744
263	0.0689509	0.26255	0.0739744	0.0960634
263.2	0.0685302	0.262559	0.0737657	0.0959817
263.4	0.0690891	0.26278	0.0733561	0.0966356
263.6	0.0691227	0.262818	0.0741867	0.0968192
263.8	0.0689139	0.262061	0.0741499	0.0965804
264	0.0693359	0.262188	0.0743639	0.0969729
264.2	0.0700591	0.263286	0.0755986	0.0970096
264.4	0.0700953	0.262696	0.0757143	0.0966813
264.6	0.0701554	0.262797	0.0757694	0.0964014
264.8	0.0703366	0.264259	0.0761611	0.0964571
265	0.0705101	0.264675	0.0765281	0.0959371
265.2	0.0694699	0.264087	0.0751309	0.0952439
265.4	0.0696791	0.264437	0.0748776	0.0948931
265.6	0.0689676	0.263546	0.0737181	0.0945436
265.8	0.0691784	0.262998	0.0734974	0.0948239
266	0.068215	0.261506	0.071724	0.094193
266.2	0.0685987	0.261209	0.0719832	0.0943812
266.4	0.0674737	0.260664	0.0716077	0.0934327
266.6	0.0684496	0.261938	0.0726046	0.0947736
266.8	0.0688671	0.261871	0.0727096	0.0953416
267	0.0696558	0.263044	0.0743163	0.0964868
267.2	0.0695453	0.262589	0.0739813	0.0962348
267.4	0.0697285	0.26284	0.074227	0.0965995
267.6	0.0690345	0.261464	0.074117	0.0956595
267.8	0.0683049	0.261284	0.0739904	0.0940004
268	0.0686212	0.261534	0.0737712	0.0942022
268.2	0.0694557	0.261769	0.0748787	0.0949277
268.4	0.0688725	0.261522	0.073591	0.093912
268.6	0.0686814	0.262373	0.0737334	0.0944369
268.8	0.0683477	0.262175	0.0731207	0.0945112
269	0.0686059	0.262505	0.0731409	0.0945739
269.2	0.0669966	0.262406	0.0718161	0.0939096
269.4	0.0678087	0.263246	0.0730967	0.0954467
269.6	0.0692673	0.263826	0.0730773	0.0957388
269.8	0.0699612	0.263938	0.0742867	0.0965057
