# Supplementary material for: HetL, HetR and PatS form a reaction-diffusion system to control pattern formation in the cyanobacterium nostoc PCC 7120
Source: eLife journal article supplement (doi:10.7554/elife.59190), 2020-08-07
Supplement: supp [file elife-59190-supp-v1.zip › elife_poa_e59190_Figure_2_source_data_2.xlsx]

## Sheet: Feuil1
Fig 2C. BLi assay between HetL and HetR in the presence of PatS-5. 10 µM of HetL was incubated 5 mins with different concentrations of PatS at 0.5, 1, 2.5 and 5 µM before bringing HetL in contact with the bound HetR. The same experiment was undergone with PatS-6 and similar results were obtained.
Time (s)	Binding response (nm)
	0 µM PatS-5	0.5 µM PatS-5	1 µM PatS-5	2.5 µM PatS-5	5 µM PatS-5
0	0	0	0	0	0
0.2	-0.00606967	-0.00365238	-0.00294642	-0.00176255	-0.00279869
0.4	-0.0062426	-0.00348043	-0.00255232	-0.00263884	-0.0026422
0.6	-0.00696411	-0.00412779	-0.0033221	-0.00321873	-0.00280356
0.8	-0.00853609	-0.00503174	-0.00276839	-0.00316236	-0.00315417
1	-0.0100795	-0.00621576	-0.00317665	-0.00460197	-0.00372586
1.2	-0.0100376	-0.00566644	-0.00222807	-0.00478679	-0.00250173
1.4	-0.0105272	-0.00568908	-0.00212273	-0.00413502	-0.00192336
1.6	-0.0117803	-0.00630832	-0.00272261	-0.00480805	-0.00194955
1.8	-0.0129255	-0.00608246	-0.00326642	-0.0055255	-0.00153835
2	-0.0113952	-0.00504136	-0.00259594	-0.004236	4.132e-05
2.2	-0.0119723	-0.00610889	-0.00340817	-0.0048609	-0.00135543
2.4	-0.0130658	-0.00747175	-0.0042059	-0.00612521	-0.00177712
2.6	-0.0127763	-0.00799912	-0.00322504	-0.00590094	-0.00223667
2.8	-0.0131773	-0.00825617	-0.00304799	-0.00646504	-0.00300985
3	-0.015462	-0.00893648	-0.00391938	-0.0074851	-0.00411201
3.2	-0.0151572	-0.00726029	-0.00351852	-0.00665505	-0.00261038
3.4	-0.0147161	-0.00676551	-0.00250958	-0.0057682	-0.00186062
3.6	-0.0151666	-0.00599011	-0.00211652	-0.00532792	-0.00115102
3.8	-0.014341	-0.00575146	-0.00248849	-0.00466945	-0.000113039
4	-0.0131076	-0.00475549	-0.00110081	-0.00349688	0.00125545
4.2	-0.0127642	-0.00485736	0.00012869	-0.00269282	0.00194528
4.4	-0.0136439	-0.00552792	-0.000975886	-0.0033264	0.00103641
4.6	-0.0140571	-0.0060167	-0.00137841	-0.00378791	0.00163677
4.8	-0.0141101	-0.00627774	-0.00136077	-0.00395587	0.0017443
5	-0.0151752	-0.00776527	-0.00230098	-0.00413372	0.00167562
5.2	-0.0148099	-0.00794153	-0.00318287	-0.00426221	0.00156273
5.4	-0.0153144	-0.00759618	-0.00313341	-0.00486901	0.00219083
5.6	-0.0144982	-0.0065388	-0.00258164	-0.0039897	0.00283255
5.8	-0.0153553	-0.00765629	-0.00327562	-0.00481923	0.00242992
6	-0.0144361	-0.00638004	-0.00299473	-0.00497569	0.00267218
6.2	-0.0152672	-0.00774917	-0.00342709	-0.00674833	0.00208403
6.4	-0.014858	-0.00890296	-0.00358006	-0.00667816	0.00120959
6.6	-0.0151139	-0.00911092	-0.00398374	-0.00640853	0.0007399
6.8	-0.0144266	-0.00789112	-0.00372647	-0.00526292	0.000966695
7	-0.0147835	-0.00873543	-0.00358621	-0.00557012	0.00023907
7.2	-0.0150554	-0.00826586	-0.00314856	-0.00428749	0.00115496
7.4	-0.0146919	-0.00729484	-0.00279525	-0.00390391	0.002022
7.6	-0.0142422	-0.0075862	-0.00270394	-0.00442493	0.00239681
7.8	-0.0144618	-0.00829328	-0.00168006	-0.00430303	0.00222738
8	-0.0145913	-0.00876627	-0.0014774	-0.00434866	0.00267851
8.2	-0.0147897	-0.00895647	-0.00267838	-0.00517647	0.00163881
8.4	-0.0140298	-0.00748477	-0.00151699	-0.00465109	0.0030216
8.6	-0.0151138	-0.00851147	-0.00304817	-0.00612316	0.0018099
8.8	-0.0149785	-0.00766273	-0.00383727	-0.00703471	0.00285922
9	-0.0163634	-0.00824324	-0.00470229	-0.00780631	0.00151011
9.2	-0.0161343	-0.00754373	-0.00315715	-0.00662161	0.00279578
9.4	-0.0175205	-0.00815612	-0.00363075	-0.00666132	0.00118666
9.6	-0.0170984	-0.00818688	-0.00228928	-0.00620891	0.00175671
9.8	-0.0166045	-0.00856208	-0.00182213	-0.00570022	0.00160063
10	-0.0158518	-0.00861997	-0.00216055	-0.00512561	0.00220884
10.2	-0.0170602	-0.0108626	-0.00345087	-0.00768777	0.00103643
10.4	-0.0164191	-0.0122879	-0.003953	-0.00758459	0.000748462
10.6	-0.0169072	-0.0108331	-0.00394134	-0.00764328	0.0012074
10.8	-0.0171762	-0.0107032	-0.00391115	-0.00724243	0.00190612
11	-0.0160737	-0.00925076	-0.00224591	-0.00627646	0.00334376
11.2	-0.0147091	-0.00738958	-0.00167351	-0.00459095	0.00378521
11.4	-0.0151742	-0.00714225	-0.00195703	-0.00602141	0.00424074
11.6	-0.0143151	-0.00793373	-0.00112816	-0.00548025	0.00420351
11.8	-0.0153557	-0.00862784	-0.00159981	-0.00650419	0.00292177
12	-0.0159935	-0.0094755	-0.00233495	-0.0071766	0.00277422
12.2	-0.015415	-0.00955847	-0.00212648	-0.00698381	0.00332447
12.4	-0.0164021	-0.0102375	-0.00307115	-0.00641155	0.00234763
12.6	-0.0165722	-0.00963047	-0.00332022	-0.00648883	0.00307516
12.8	-0.0162016	-0.00974644	-0.00309241	-0.00569525	0.003674
13	-0.0154594	-0.0089839	-0.00271882	-0.00556175	0.00338654
13.2	-0.0161269	-0.00934193	-0.00242202	-0.00580004	0.00374554
13.4	-0.0152292	-0.00912161	-0.00223736	-0.00587993	0.00395783
13.6	-0.0156279	-0.00986694	-0.00335239	-0.0060517	0.0030207
13.8	-0.0148393	-0.00941917	-0.00340308	-0.005647	0.00324543
14	-0.0162094	-0.0106127	-0.00451122	-0.00671254	0.00270637
14.2	-0.0165927	-0.0110393	-0.0048966	-0.00664162	0.00161314
14.4	-0.0176762	-0.0111742	-0.00507957	-0.00725465	0.00132037
14.6	-0.0162849	-0.00986868	-0.00365684	-0.00550396	0.00267738
14.8	-0.0166591	-0.00975383	-0.0037836	-0.00562017	0.0026404
15	-0.0153616	-0.00825272	-0.00295094	-0.00413493	0.00396995
15.2	-0.0145667	-0.00747166	-0.00365379	-0.00440139	0.0040626
15.4	-0.0136916	-0.00653156	-0.00294196	-0.00359814	0.00531752
15.6	-0.0152293	-0.00823191	-0.00438036	-0.00607311	0.00438014
15.8	-0.0137675	-0.00774523	-0.0038668	-0.00613824	0.00444748
16	-0.0137034	-0.00807561	-0.00391943	-0.00587499	0.00427873
16.2	-0.0142141	-0.00887696	-0.00316534	-0.0052941	0.00501968
16.4	-0.0138628	-0.00867799	-0.00264682	-0.00453826	0.00482936
16.6	-0.0132603	-0.00819995	-0.00253621	-0.00343807	0.00594548
16.8	-0.0136945	-0.00849427	-0.00266474	-0.00347045	0.00656053
17	-0.0136724	-0.00853676	-0.00223483	-0.00421778	0.00591018
17.2	-0.0140206	-0.00825731	-0.00311999	-0.00507105	0.00554428
17.4	-0.0139928	-0.0089631	-0.00417068	-0.00604874	0.00588246
17.6	-0.0146187	-0.00964385	-0.00460395	-0.00718321	0.00439224
17.8	-0.0152407	-0.0102359	-0.00504633	-0.0073038	0.00390213
18	-0.014827	-0.00976682	-0.00501981	-0.00642705	0.00564221
18.2	-0.0150992	-0.0100847	-0.00481835	-0.00640182	0.00506303
18.4	-0.0144444	-0.0104124	-0.00395152	-0.00486596	0.00591074
18.6	-0.0141262	-0.0099317	-0.00380146	-0.00483405	0.00674674
18.8	-0.0138548	-0.00925805	-0.00363145	-0.00424938	0.00665165
19	-0.0162065	-0.0112945	-0.00484078	-0.00583732	0.00447133
19.2	-0.015614	-0.0101611	-0.00551411	-0.00553311	0.00463441
19.4	-0.0164472	-0.0107441	-0.00609453	-0.00701792	0.00323974
19.6	-0.015125	-0.0103316	-0.00512236	-0.00598049	0.0037709
19.8	-0.0161199	-0.0104635	-0.00551164	-0.00664323	0.00407693
20	-0.0142682	-0.00913927	-0.00475729	-0.00607384	0.00460381
20.2	-0.0141338	-0.0109482	-0.00407772	-0.00605892	0.00478551
20.4	-0.0135561	-0.00989624	-0.00390075	-0.00544938	0.00518014
20.6	-0.0151654	-0.011145	-0.00475786	-0.00610922	0.00369127
20.8	-0.0154891	-0.0126588	-0.00520741	-0.00690681	0.00260348
21	-0.0152055	-0.0123146	-0.00493431	-0.00629903	0.00391463
21.2	-0.0152399	-0.012344	-0.00502748	-0.0062837	0.0035214
21.4	-0.0156633	-0.0120157	-0.00518158	-0.00689367	0.00397932
21.6	-0.0146311	-0.0110542	-0.00453219	-0.00623524	0.00496394
21.8	-0.0133366	-0.00914327	-0.0037181	-0.00502484	0.00670925
22	-0.0134056	-0.0101424	-0.00431442	-0.00529605	0.006051
22.2	-0.0131354	-0.0096882	-0.00400806	-0.00594227	0.0063596
22.4	-0.013009	-0.0102518	-0.00408516	-0.00592662	0.00562083
22.6	-0.0136792	-0.0105201	-0.00506741	-0.00627326	0.00610744
22.8	-0.0143643	-0.0119435	-0.00576911	-0.00687914	0.00483171
23	-0.0143987	-0.0112953	-0.00522469	-0.0075817	0.00531985
23.2	-0.0134578	-0.0112851	-0.00544969	-0.00665936	0.00596851
23.4	-0.0121305	-0.0100088	-0.00478272	-0.00513293	0.00767101
23.6	-0.0119532	-0.00991466	-0.00416435	-0.00575694	0.00780005
23.8	-0.0107172	-0.00893146	-0.00313528	-0.00549922	0.00824159
24	-0.011009	-0.00967049	-0.00309859	-0.0051312	0.00778181
24.2	-0.0129274	-0.0110761	-0.00383378	-0.00676355	0.00658277
24.4	-0.0145956	-0.0123681	-0.00400184	-0.00839657	0.00553712
24.6	-0.0142895	-0.0121469	-0.00279883	-0.00704203	0.00603304
24.8	-0.0149846	-0.0124786	-0.00337867	-0.00675094	0.0063433
25	-0.0141302	-0.012262	-0.00273782	-0.00642284	0.00682015
25.2	-0.0138886	-0.0107122	-0.00199077	-0.00578252	0.00710998
25.4	-0.0132227	-0.0105877	-0.00205477	-0.00488735	0.00766808
25.6	-0.0134305	-0.0114311	-0.00329367	-0.00634559	0.00640902
25.8	-0.0138119	-0.0109191	-0.00271833	-0.00663488	0.00620182
26	-0.0138576	-0.0105808	-0.00319366	-0.00618098	0.0068856
26.2	-0.0131876	-0.0104696	-0.0026591	-0.00518918	0.00834814
26.4	-0.0136855	-0.0114939	-0.00290378	-0.00609083	0.00793031
26.6	-0.0140875	-0.0110212	-0.0024747	-0.00566386	0.0087299
26.8	-0.0132732	-0.0111889	-0.00272599	-0.00543512	0.00909227
27	-0.0142926	-0.0125667	-0.00451145	-0.0069019	0.00764633
27.2	-0.0144619	-0.0122912	-0.0046575	-0.00737893	0.00676812
27.4	-0.0127782	-0.0109573	-0.00369301	-0.00617081	0.00783413
27.6	-0.0123885	-0.0106	-0.00359049	-0.00596629	0.00798072
27.8	-0.0130756	-0.0117675	-0.00436461	-0.0066984	0.00777891
28	-0.0125856	-0.0109527	-0.00308062	-0.00619269	0.00810476
28.2	-0.012921	-0.0118721	-0.00360864	-0.00578137	0.00851059
28.4	-0.0145021	-0.0141294	-0.00522149	-0.00782999	0.00693648
28.6	-0.0144961	-0.0143667	-0.00494599	-0.00762092	0.0066716
28.8	-0.01517	-0.0144605	-0.00509987	-0.0078324	0.00635472
29	-0.01557	-0.0141919	-0.00493242	-0.00738302	0.0065283
29.2	-0.0149231	-0.0141663	-0.00465036	-0.00734105	0.00588882
29.4	-0.0151625	-0.0128242	-0.00381061	-0.00589625	0.00671784
29.6	-0.0154883	-0.0132851	-0.00468122	-0.00722327	0.00622948
29.8	-0.0149678	-0.0134692	-0.00457465	-0.00704505	0.00665881
30	0.0136705	-0.011403	0.001179	-0.017962	0.0013405
30.2	0.0653835	0.016286	0.038882	0.002032	0.0217585
30.4	0.133729	0.0704855	0.0870255	0.044839	0.0595
30.6	0.192772	0.119237	0.12763	0.077556	0.086676
30.8	0.23322	0.160171	0.157591	0.0931925	0.096399
31	0.280228	0.193875	0.18669	0.11493	0.114428
31.2	0.31904	0.224165	0.209977	0.132355	0.126708
31.4	0.346171	0.245156	0.225478	0.140548	0.131335
31.6	0.366101	0.256766	0.233554	0.143082	0.129994
31.8	0.385085	0.266874	0.24073	0.146955	0.13078
32	0.400664	0.273754	0.247632	0.149969	0.132511
32.2	0.410262	0.279222	0.250337	0.149158	0.130341
32.4	0.420698	0.283367	0.252685	0.148842	0.12839
32.6	0.43036	0.289399	0.253664	0.149053	0.129066
32.8	0.433622	0.289433	0.251571	0.146367	0.125875
33	0.436636	0.291873	0.251618	0.144337	0.123858
33.2	0.440792	0.293028	0.251312	0.143399	0.12394
33.4	0.442807	0.293967	0.250385	0.142432	0.122546
33.6	0.445734	0.29288	0.251855	0.140929	0.121491
33.8	0.448297	0.292879	0.251329	0.140148	0.121556
34	0.450833	0.292678	0.24852	0.138192	0.118942
34.2	0.4516	0.292238	0.249064	0.136093	0.117162
34.4	0.453839	0.291802	0.247562	0.13443	0.117634
34.6	0.453624	0.292371	0.245142	0.1332	0.115825
34.8	0.455034	0.291446	0.245463	0.132215	0.114838
35	0.457404	0.291584	0.246912	0.132492	0.1151
35.2	0.461388	0.292093	0.245142	0.132997	0.113662
35.4	0.460775	0.289881	0.244253	0.130952	0.110403
35.6	0.463306	0.290226	0.244791	0.130894	0.109091
35.8	0.465661	0.290708	0.244209	0.129888	0.10863
36	0.464678	0.289674	0.241063	0.127163	0.107119
36.2	0.465361	0.288737	0.239655	0.126829	0.106778
36.4	0.468053	0.289594	0.24029	0.127547	0.106491
36.6	0.468827	0.287412	0.237723	0.124208	0.105419
36.8	0.469858	0.288473	0.237819	0.122837	0.103915
37	0.472417	0.287294	0.239032	0.122462	0.10284
37.2	0.472276	0.287006	0.23994	0.120309	0.102894
37.4	0.471284	0.285193	0.236852	0.118344	0.101278
37.6	0.471656	0.284772	0.236486	0.119351	0.100951
37.8	0.47056	0.280782	0.232597	0.116963	0.09734
38	0.4712	0.283116	0.231807	0.117453	0.0981275
38.2	0.471468	0.282259	0.228974	0.116166	0.0952415
38.4	0.472332	0.281339	0.228057	0.113711	0.094069
38.6	0.472015	0.279412	0.226057	0.110701	0.090923
38.8	0.472585	0.278477	0.225925	0.110456	0.093152
39	0.47494	0.277597	0.226114	0.109649	0.0941635
39.2	0.47603	0.277958	0.226796	0.110659	0.095644
39.4	0.477929	0.280967	0.22827	0.113049	0.09802
39.6	0.479618	0.281664	0.228643	0.11433	0.100019
39.8	0.479836	0.281711	0.227259	0.112134	0.0972365
40	0.475959	0.276776	0.223243	0.108349	0.092759
40.2	0.473217	0.27368	0.220095	0.105176	0.090086
40.4	0.473929	0.27262	0.218599	0.103107	0.088951
40.6	0.472428	0.270877	0.21663	0.0993755	0.086041
40.8	0.47376	0.271613	0.21728	0.101352	0.088025
41	0.475765	0.272541	0.218506	0.102954	0.088803
41.2	0.477322	0.271425	0.216803	0.10249	0.089202
41.4	0.477099	0.268917	0.216108	0.101711	0.0876595
41.6	0.479122	0.270597	0.217209	0.104829	0.091421
41.8	0.478224	0.27015	0.215148	0.10387	0.0892625
42	0.476386	0.268911	0.211662	0.100532	0.086322
42.2	0.476881	0.269036	0.213587	0.100468	0.084569
42.4	0.479578	0.271	0.213249	0.100928	0.0853415
42.6	0.479862	0.267829	0.211132	0.098516	0.0831235
42.8	0.48173	0.267545	0.212524	0.097627	0.083154
43	0.484681	0.26924	0.214657	0.100334	0.086716
43.2	0.484882	0.269951	0.213079	0.100521	0.086414
43.4	0.483075	0.268265	0.212647	0.10035	0.085048
43.6	0.480381	0.268046	0.211039	0.0983405	0.082852
43.8	0.479924	0.268029	0.210046	0.098084	0.0831065
44	0.479695	0.266377	0.208297	0.096536	0.081201
44.2	0.481622	0.268107	0.209953	0.0966755	0.0832965
44.4	0.478704	0.264979	0.206856	0.0939955	0.080972
44.6	0.479173	0.262769	0.207127	0.094288	0.080181
44.8	0.479258	0.263046	0.206707	0.094146	0.0789725
45	0.477877	0.263786	0.207238	0.0940705	0.0785695
45.2	0.475584	0.260473	0.204385	0.0921055	0.0756875
45.4	0.478952	0.26141	0.20533	0.0929565	0.0777415
45.6	0.48139	0.263663	0.206227	0.092896	0.0785915
45.8	0.482109	0.262356	0.205798	0.0920685	0.0792315
46	0.483237	0.261782	0.205045	0.0916595	0.079785
46.2	0.485366	0.264208	0.206601	0.093044	0.0813185
46.4	0.483867	0.263848	0.205989	0.092073	0.079882
46.6	0.48215	0.263877	0.203723	0.092549	0.0796505
46.8	0.480217	0.261818	0.202358	0.091349	0.078835
47	0.481295	0.261016	0.202046	0.0912975	0.077688
47.2	0.481154	0.2588	0.201013	0.0897505	0.076912
47.4	0.482305	0.259559	0.200681	0.091811	0.078226
47.6	0.482193	0.257333	0.200808	0.090626	0.0769325
47.8	0.48376	0.2579	0.200184	0.091734	0.0761885
48	0.483314	0.258089	0.200038	0.091055	0.0773495
48.2	0.482928	0.25922	0.200072	0.091172	0.076938
48.4	0.481934	0.257182	0.198724	0.08907	0.0752655
48.6	0.484702	0.259397	0.199574	0.0902385	0.0772225
48.8	0.485044	0.258084	0.199411	0.088557	0.076968
49	0.483524	0.256609	0.197279	0.087501	0.0741685
49.2	0.484287	0.255251	0.195738	0.087452	0.0758265
49.4	0.486722	0.257073	0.198295	0.0887595	0.0768945
49.6	0.48348	0.252969	0.195616	0.0864685	0.0750275
49.8	0.484557	0.253935	0.196139	0.0874295	0.076705
50	0.485877	0.253757	0.196193	0.086477	0.076914
50.2	0.485368	0.25292	0.196142	0.0848525	0.0760205
50.4	0.484523	0.250606	0.194402	0.0824285	0.0739465
50.6	0.48753	0.253333	0.196265	0.085135	0.076089
50.8	0.487208	0.253182	0.196022	0.084688	0.0740685
51	0.487331	0.253049	0.196889	0.085662	0.076261
51.2	0.48662	0.2525	0.195908	0.0861295	0.073767
51.4	0.485783	0.251798	0.194647	0.086229	0.0736285
51.6	0.483363	0.250584	0.194328	0.0853875	0.07169
51.8	0.482108	0.249209	0.190676	0.083232	0.070695
52	0.481762	0.248784	0.189378	0.083798	0.0693925
52.2	0.482228	0.247725	0.188322	0.0846175	0.070809
52.4	0.48132	0.248092	0.187039	0.08413	0.07076
52.6	0.482499	0.248336	0.185581	0.0824305	0.0706425
52.8	0.483259	0.247677	0.186405	0.083121	0.071438
53	0.483197	0.246438	0.187346	0.0824325	0.071507
53.2	0.483669	0.246305	0.188456	0.0804715	0.0713935
53.4	0.485671	0.24703	0.189554	0.0805305	0.0716635
53.6	0.486146	0.246316	0.190328	0.083196	0.0726265
53.8	0.485603	0.246022	0.191405	0.0840925	0.074329
54	0.485744	0.247651	0.189663	0.082548	0.07349
54.2	0.486144	0.248	0.187915	0.0835825	0.071683
54.4	0.486374	0.247658	0.188405	0.0842525	0.0730715
54.6	0.487253	0.247986	0.187324	0.082638	0.0739755
54.8	0.487758	0.247408	0.18578	0.0812415	0.071344
55	0.488365	0.246598	0.186738	0.0819895	0.0715305
55.2	0.488867	0.247722	0.187974	0.0823525	0.0742525
55.4	0.486468	0.245602	0.18615	0.0794115	0.0709525
55.6	0.485523	0.245217	0.186409	0.078912	0.070488
55.8	0.48491	0.245509	0.186954	0.079361	0.0704775
56	0.484572	0.244419	0.186538	0.079629	0.070352
56.2	0.481578	0.242016	0.183983	0.0765865	0.06735
56.4	0.483601	0.244101	0.183593	0.0772155	0.069826
56.6	0.482915	0.242794	0.182698	0.0771265	0.06899
56.8	0.482846	0.241668	0.182132	0.0771765	0.0676235
57	0.48146	0.240677	0.179757	0.075792	0.06602
57.2	0.482138	0.239526	0.17873	0.0760825	0.06487
57.4	0.481108	0.239209	0.178837	0.076694	0.064579
57.6	0.481342	0.238406	0.178273	0.075483	0.0645775
57.8	0.480396	0.238144	0.176624	0.07408	0.065688
58	0.480181	0.240068	0.176854	0.0745315	0.0644195
58.2	0.480062	0.238931	0.177678	0.074283	0.0660615
58.4	0.477797	0.23593	0.175974	0.071821	0.063162
58.6	0.477445	0.234685	0.174984	0.0704125	0.061985
58.8	0.477189	0.233312	0.174212	0.0689395	0.0612065
59	0.478304	0.232576	0.175038	0.070284	0.064896
59.2	0.480541	0.235981	0.176273	0.07186	0.064336
59.4	0.48382	0.237239	0.178509	0.0734505	0.0663025
59.6	0.485266	0.239845	0.180663	0.076335	0.067841
59.8	0.485708	0.240988	0.181793	0.077768	0.067922
60	0.48632	0.240483	0.179705	0.0753685	0.065931
60.2	0.48333	0.237104	0.178144	0.0731495	0.0647665
60.4	0.482074	0.236393	0.175282	0.072904	0.06258
60.6	0.479647	0.234587	0.172756	0.0713395	0.060259
60.8	0.47997	0.234754	0.173046	0.0704895	0.0605975
61	0.478314	0.233298	0.172775	0.070976	0.0598695
61.2	0.478965	0.234902	0.173112	0.07248	0.0605275
61.4	0.481749	0.236311	0.17523	0.0734935	0.0624285
61.6	0.482404	0.236131	0.174327	0.0731985	0.0626485
61.8	0.481036	0.234493	0.172048	0.072885	0.0606695
62	0.481388	0.23593	0.174124	0.073411	0.061276
62.2	0.482221	0.235629	0.173356	0.072546	0.0621055
62.4	0.479793	0.233752	0.171003	0.0719445	0.0601055
62.6	0.480658	0.235192	0.172719	0.0727735	0.0606115
62.8	0.480381	0.235536	0.172027	0.0721285	0.060102
63	0.482726	0.235459	0.171888	0.072487	0.0605735
63.2	0.482477	0.23429	0.172683	0.072374	0.059292
63.4	0.482137	0.234523	0.171981	0.0719755	0.059706
63.6	0.482098	0.234193	0.17072	0.071204	0.05894
63.8	0.483294	0.23345	0.171817	0.0709795	0.0599535
64	0.482109	0.232861	0.171008	0.0703815	0.0608675
64.2	0.481258	0.233509	0.170544	0.0696115	0.059494
64.4	0.480833	0.231943	0.170183	0.0684155	0.058409
64.6	0.48245	0.233362	0.172956	0.070545	0.0606445
64.8	0.482465	0.233787	0.172148	0.0706765	0.059807
65	0.481791	0.234652	0.171959	0.0709765	0.059029
65.2	0.481971	0.235013	0.171997	0.0720475	0.0611565
65.4	0.482131	0.233631	0.172272	0.070683	0.061151
65.6	0.481307	0.231707	0.169782	0.0690725	0.059889
65.8	0.480291	0.231564	0.170626	0.068917	0.0600665
66	0.478933	0.228726	0.168514	0.067274	0.0573705
66.2	0.478925	0.227546	0.167814	0.0655605	0.0556315
66.4	0.480142	0.22987	0.168005	0.0672705	0.055532
66.6	0.478925	0.230469	0.169728	0.0671865	0.0564035
66.8	0.481025	0.230912	0.169262	0.0678295	0.057273
67	0.483443	0.231618	0.170418	0.067529	0.05785
67.2	0.48495	0.233361	0.171089	0.0697575	0.060355
67.4	0.484688	0.233189	0.171429	0.069532	0.0598115
67.6	0.484963	0.23291	0.169651	0.0694865	0.05762
67.8	0.4841	0.232686	0.168668	0.0690245	0.0579215
68	0.484241	0.235058	0.168196	0.0704335	0.0593705
68.2	0.482194	0.231935	0.165974	0.0665835	0.0565305
68.4	0.482366	0.231546	0.165957	0.066213	0.0582245
68.6	0.483014	0.232	0.166243	0.067489	0.059791
68.8	0.483034	0.230249	0.168029	0.0678775	0.059064
69	0.482927	0.22845	0.169463	0.067434	0.058617
69.2	0.482775	0.229993	0.169935	0.0681315	0.060002
69.4	0.483164	0.230891	0.170455	0.069211	0.0598505
69.6	0.48038	0.228555	0.170146	0.066246	0.057962
69.8	0.481714	0.229812	0.168536	0.066209	0.0564005
70	0.482046	0.23099	0.168274	0.0678525	0.058368
70.2	0.482441	0.231161	0.169402	0.0689465	0.058193
70.4	0.482067	0.231542	0.169294	0.068487	0.0590975
70.6	0.48345	0.233436	0.168578	0.0693165	0.059746
70.8	0.480758	0.231582	0.169224	0.067755	0.0594785
71	0.478716	0.22752	0.166826	0.064118	0.055334
71.2	0.480094	0.228112	0.167211	0.0657545	0.0558125
71.4	0.479586	0.227139	0.167124	0.065138	0.0549325
71.6	0.479159	0.225172	0.164844	0.064403	0.053123
71.8	0.478534	0.226345	0.163668	0.0652285	0.0532285
72	0.48026	0.22876	0.164838	0.067065	0.0549685
72.2	0.480127	0.227651	0.164477	0.066131	0.0552925
72.4	0.480625	0.226359	0.16282	0.0658345	0.0541185
72.6	0.481766	0.226877	0.16502	0.066592	0.055878
72.8	0.485472	0.227485	0.165762	0.0668145	0.0568335
73	0.484682	0.227678	0.166226	0.066679	0.0568515
73.2	0.483079	0.228177	0.165253	0.065634	0.054764
73.4	0.480803	0.228011	0.16483	0.065013	0.055499
73.6	0.480611	0.229506	0.164247	0.0649535	0.054857
73.8	0.478588	0.2272	0.164323	0.0644785	0.0548525
74	0.478022	0.225575	0.164675	0.0638475	0.055483
74.2	0.479022	0.223982	0.164054	0.063532	0.056296
74.4	0.480923	0.224745	0.164156	0.0638135	0.055276
74.6	0.482651	0.224825	0.166417	0.065583	0.0583235
74.8	0.48318	0.226826	0.16508	0.067285	0.058729
75	0.485496	0.228183	0.163869	0.0670655	0.059025
75.2	0.485164	0.229243	0.164609	0.0685155	0.0597335
75.4	0.485242	0.22883	0.164722	0.0682105	0.059663
75.6	0.4847	0.230178	0.164131	0.0683925	0.0576205
75.8	0.485391	0.230378	0.166181	0.067692	0.059218
76	0.48501	0.231171	0.166696	0.069104	0.0579745
76.2	0.484311	0.230141	0.165515	0.0690655	0.0569445
76.4	0.485202	0.230076	0.168427	0.071209	0.0594235
76.6	0.484762	0.229127	0.167607	0.070155	0.059459
76.8	0.484317	0.227294	0.166261	0.069307	0.058079
77	0.481585	0.226904	0.165735	0.0687375	0.05789
77.2	0.482017	0.228631	0.165467	0.06954	0.0580415
77.4	0.481708	0.229141	0.162031	0.06805	0.056451
77.6	0.48192	0.228526	0.162147	0.067017	0.055613
77.8	0.481537	0.228559	0.161722	0.067337	0.0553785
78	0.484373	0.227215	0.160823	0.0672595	0.0557785
78.2	0.482971	0.226446	0.162099	0.066055	0.05556
78.4	0.48333	0.227883	0.162914	0.067922	0.056642
78.6	0.48125	0.225654	0.160878	0.0673025	0.055513
78.8	0.481467	0.227913	0.162623	0.068696	0.055612
79	0.479956	0.22683	0.161824	0.067086	0.05539
79.2	0.482822	0.229468	0.163892	0.069763	0.0581615
79.4	0.482123	0.226358	0.163877	0.0677945	0.056275
79.6	0.4841	0.228027	0.165393	0.0688425	0.0580035
79.8	0.48173	0.225183	0.162845	0.06547	0.055556
80	0.483101	0.227989	0.164943	0.067042	0.0553625
80.2	0.482383	0.227104	0.163409	0.0648265	0.053134
80.4	0.483115	0.227228	0.163459	0.065311	0.053091
80.6	0.481013	0.225154	0.1619	0.063227	0.05099
80.8	0.483014	0.227718	0.163787	0.065993	0.053502
81	0.48177	0.225593	0.162654	0.0639875	0.053209
81.2	0.481746	0.22453	0.162785	0.064672	0.05425
81.4	0.481413	0.224426	0.1619	0.063848	0.054899
81.6	0.481506	0.225385	0.162527	0.063948	0.056217
81.8	0.482355	0.226011	0.162946	0.0642245	0.05738
82	0.482091	0.225011	0.161204	0.0633825	0.056365
82.2	0.482308	0.223789	0.161868	0.063736	0.056199
82.4	0.481215	0.224725	0.161236	0.0641675	0.055528
82.6	0.483027	0.223328	0.161613	0.064734	0.055815
82.8	0.482946	0.22146	0.161806	0.0660335	0.0547165
83	0.483874	0.222907	0.163067	0.0666345	0.0555215
83.2	0.482974	0.224045	0.161575	0.0649125	0.0545355
83.4	0.484233	0.223539	0.161848	0.064543	0.054944
83.6	0.485109	0.226497	0.163836	0.067345	0.056288
83.8	0.485014	0.226599	0.162464	0.066189	0.0561845
84	0.483937	0.22394	0.160936	0.065121	0.0541525
84.2	0.485451	0.223314	0.161299	0.0661175	0.0551995
84.4	0.486376	0.224693	0.162047	0.0688275	0.055279
84.6	0.483878	0.222492	0.15984	0.065835	0.054023
84.8	0.482912	0.222256	0.160744	0.065222	0.054163
85	0.483125	0.223753	0.159818	0.065464	0.05521
85.2	0.483245	0.225271	0.160851	0.066134	0.05613
85.4	0.482543	0.224793	0.160559	0.064344	0.055852
85.6	0.484223	0.225474	0.159995	0.0643545	0.056061
85.8	0.484316	0.224427	0.157601	0.0629405	0.0540645
86	0.48564	0.224602	0.159084	0.064101	0.055343
86.2	0.485882	0.224733	0.159011	0.063443	0.0556925
86.4	0.484629	0.222406	0.159191	0.063125	0.0553095
86.6	0.484144	0.222037	0.159916	0.0623685	0.0545215
86.8	0.483399	0.22367	0.161393	0.064064	0.0558565
87	0.482171	0.223926	0.16182	0.0631105	0.055491
87.2	0.480971	0.22203	0.159719	0.062577	0.0523135
87.4	0.482191	0.225066	0.160042	0.062831	0.052972
87.6	0.480591	0.224814	0.158295	0.061846	0.053211
87.8	0.48144	0.225448	0.158593	0.0613115	0.053443
88	0.482068	0.224549	0.158021	0.0611965	0.052331
88.2	0.481204	0.225777	0.158874	0.0609475	0.053382
88.4	0.482287	0.22564	0.159954	0.062386	0.053712
88.6	0.483604	0.225572	0.161003	0.063516	0.0537975
88.8	0.481636	0.221362	0.157954	0.0602175	0.0516285
89	0.482082	0.222518	0.158849	0.061845	0.0532905
89.2	0.486129	0.221648	0.159741	0.0638965	0.0543615
89.4	0.484855	0.220513	0.157291	0.060245	0.0533325
89.6	0.484331	0.219955	0.156474	0.060692	0.051722
89.8	0.48579	0.221687	0.158182	0.063673	0.0532535
90	0.484355	0.220628	0.156172	0.0613935	0.051463
90.2	0.483249	0.222572	0.156232	0.0594425	0.051853
90.4	0.483328	0.222054	0.15637	0.060641	0.0526695
90.6	0.486943	0.224786	0.159036	0.062117	0.05542
90.8	0.487182	0.225582	0.159229	0.0607935	0.054634
91	0.488073	0.224209	0.159903	0.0614895	0.0539895
91.2	0.486633	0.223106	0.158164	0.061187	0.0527975
91.4	0.488543	0.223487	0.160015	0.06209	0.053614
91.6	0.48508	0.220744	0.157669	0.060294	0.052701
91.8	0.486033	0.223155	0.159197	0.062631	0.05455
92	0.486134	0.225695	0.159413	0.0633355	0.055811
92.2	0.486841	0.225655	0.161193	0.063796	0.0563775
92.4	0.483511	0.224285	0.158318	0.0633455	0.0546995
92.6	0.482542	0.223419	0.158099	0.0620945	0.053005
92.8	0.483361	0.221769	0.158312	0.062819	0.054945
93	0.481806	0.220717	0.157448	0.0606545	0.053544
93.2	0.480837	0.220216	0.156121	0.0602185	0.05283
93.4	0.482083	0.222502	0.158291	0.0605925	0.054356
93.6	0.481408	0.223183	0.157823	0.061766	0.0545125
93.8	0.478783	0.221338	0.155655	0.0593615	0.0512105
94	0.479438	0.219564	0.154068	0.0604155	0.051193
94.2	0.481162	0.221218	0.155163	0.0616695	0.0516085
94.4	0.482074	0.221984	0.155402	0.062146	0.0504385
94.6	0.48397	0.223183	0.156652	0.0624725	0.0526355
94.8	0.483785	0.222256	0.155997	0.060878	0.0511895
95	0.485806	0.224252	0.158753	0.0630955	0.053439
95.2	0.48282	0.221639	0.157493	0.061936	0.052546
95.4	0.480714	0.218358	0.155857	0.0595395	0.051545
95.6	0.480928	0.217933	0.155216	0.0591565	0.0494545
95.8	0.484665	0.220899	0.157833	0.061655	0.053013
96	0.482162	0.219643	0.157036	0.059147	0.0507505
96.2	0.483319	0.218549	0.157144	0.058222	0.050195
96.4	0.483147	0.218527	0.156956	0.0584175	0.0501325
96.6	0.481401	0.217769	0.155916	0.057421	0.0487995
96.8	0.480074	0.217721	0.155341	0.058088	0.047903
97	0.479366	0.217358	0.15371	0.057706	0.048988
97.2	0.479455	0.217101	0.151852	0.057678	0.0475605
97.4	0.480995	0.218003	0.152193	0.0584545	0.0473805
97.6	0.483154	0.219468	0.153623	0.058968	0.048693
97.8	0.482518	0.219977	0.153329	0.0582225	0.048002
98	0.483271	0.220735	0.15477	0.0576555	0.046493
98.2	0.484063	0.222958	0.157197	0.058967	0.0499775
98.4	0.484668	0.223733	0.158677	0.059533	0.0504705
98.6	0.483762	0.221747	0.157716	0.059228	0.049955
98.8	0.483822	0.220281	0.156915	0.0590905	0.0493445
99	0.48492	0.220096	0.15659	0.060253	0.049811
99.2	0.485263	0.220131	0.156855	0.060841	0.0493045
99.4	0.48366	0.220208	0.156104	0.0602245	0.05069
99.6	0.484258	0.221362	0.157407	0.0614905	0.0516395
99.8	0.484046	0.221604	0.158471	0.060993	0.053014
100	0.484306	0.221926	0.159194	0.059987	0.0539965
100.2	0.484739	0.22139	0.158544	0.05977	0.0541755
100.4	0.485057	0.21953	0.157606	0.0591765	0.052345
100.6	0.484884	0.219913	0.157099	0.058249	0.0526565
100.8	0.484186	0.219887	0.155037	0.0574105	0.050912
101	0.483404	0.2197	0.154286	0.059318	0.0503
101.2	0.481919	0.22005	0.154107	0.056815	0.0493445
101.4	0.482042	0.219743	0.153943	0.056172	0.0489685
101.6	0.481424	0.218352	0.15237	0.0548785	0.048202
101.8	0.482015	0.217954	0.153896	0.0558125	0.049487
102	0.481917	0.218107	0.153979	0.0548175	0.049421
102.2	0.481935	0.217712	0.153016	0.055031	0.0489525
102.4	0.482809	0.219417	0.153217	0.0570425	0.050894
102.6	0.483281	0.22087	0.154577	0.0583975	0.0506885
102.8	0.483091	0.221492	0.154701	0.058303	0.049763
103	0.484422	0.221145	0.1553	0.0588985	0.0506515
103.2	0.485442	0.221973	0.15701	0.06021	0.0516615
103.4	0.485977	0.222852	0.157856	0.060688	0.050371
103.6	0.486273	0.222679	0.157545	0.061013	0.0499315
103.8	0.486718	0.221772	0.156949	0.061081	0.049722
104	0.487427	0.22139	0.156994	0.0623775	0.049526
104.2	0.486801	0.219207	0.155255	0.0612325	0.047946
104.4	0.485637	0.217735	0.153551	0.0593295	0.047427
104.6	0.484971	0.216678	0.15312	0.058442	0.0467555
104.8	0.485014	0.217908	0.154041	0.059054	0.0472125
105	0.483052	0.217388	0.153002	0.0571145	0.045944
105.2	0.482932	0.219206	0.154042	0.0576945	0.0463175
105.4	0.482022	0.217921	0.153806	0.0577425	0.0452955
105.6	0.483487	0.21996	0.153141	0.058538	0.0459605
105.8	0.481767	0.218194	0.150967	0.0568055	0.044997
106	0.481523	0.218251	0.149733	0.056295	0.044089
106.2	0.480769	0.216752	0.14805	0.0567405	0.043593
106.4	0.480202	0.217783	0.148876	0.057344	0.0454665
106.6	0.480493	0.218675	0.150893	0.05865	0.0477195
106.8	0.482859	0.21998	0.151238	0.0595145	0.048055
107	0.4824	0.2192	0.15253	0.059664	0.0481995
107.2	0.483048	0.22022	0.153811	0.0592855	0.0493265
107.4	0.483164	0.219514	0.153377	0.05674	0.0479135
107.6	0.482437	0.21684	0.152176	0.0554285	0.04606
107.8	0.482979	0.21873	0.153235	0.0569225	0.047087
108	0.482797	0.219739	0.153694	0.057166	0.0467785
108.2	0.483012	0.220498	0.154486	0.058309	0.0477825
108.4	0.484376	0.219309	0.153243	0.06002	0.0474455
108.6	0.484893	0.220938	0.154268	0.060342	0.0490965
108.8	0.483565	0.218272	0.154861	0.0583655	0.049271
109	0.486093	0.218801	0.1552	0.0590785	0.052295
109.2	0.486974	0.219385	0.155241	0.0593935	0.0527555
109.4	0.487577	0.222112	0.1568	0.060042	0.0536315
109.6	0.486934	0.220606	0.154549	0.0581875	0.0516955
109.8	0.487347	0.221964	0.154153	0.058294	0.051266
110	0.484879	0.220834	0.152605	0.056792	0.048841
110.2	0.483892	0.219254	0.150781	0.054879	0.0468385
110.4	0.483048	0.218103	0.150371	0.0548335	0.047328
110.6	0.484869	0.219575	0.152681	0.0571105	0.0502435
110.8	0.484747	0.218858	0.151511	0.0574825	0.049792
111	0.486555	0.219742	0.152252	0.0586795	0.050756
111.2	0.487137	0.220166	0.153118	0.0594635	0.050379
111.4	0.488462	0.22046	0.152748	0.058918	0.0497015
111.6	0.485816	0.218517	0.151025	0.0578325	0.046546
111.8	0.487924	0.220251	0.153722	0.0600045	0.0497315
112	0.488227	0.219149	0.153306	0.0600055	0.048676
112.2	0.487896	0.218938	0.153821	0.060509	0.050135
112.4	0.486825	0.218564	0.155175	0.0615205	0.049486
112.6	0.487122	0.218578	0.155672	0.0607605	0.049694
112.8	0.483793	0.21572	0.151604	0.056891	0.046761
113	0.483363	0.217261	0.15173	0.0568185	0.0477865
113.2	0.48154	0.215473	0.15027	0.05514	0.046114
113.4	0.482302	0.216974	0.151186	0.0540555	0.04788
113.6	0.483214	0.216964	0.15092	0.0548735	0.047083
113.8	0.485079	0.217852	0.152862	0.0565315	0.0473075
114	0.484579	0.219243	0.15276	0.0570425	0.046403
114.2	0.48393	0.219668	0.152419	0.057312	0.0456705
114.4	0.483106	0.217795	0.149459	0.056542	0.0441515
114.6	0.48323	0.217381	0.150171	0.056574	0.044367
114.8	0.48126	0.216689	0.149229	0.054631	0.0424655
115	0.480109	0.213651	0.147447	0.0526045	0.0412005
115.2	0.480906	0.214766	0.148889	0.053495	0.042697
115.4	0.481664	0.215165	0.149802	0.05442	0.0440575
115.6	0.480988	0.215156	0.148593	0.052708	0.0437025
115.8	0.482411	0.21689	0.149605	0.0544	0.0455355
116	0.482735	0.216526	0.150065	0.054544	0.045381
116.2	0.482669	0.21652	0.150771	0.0537535	0.0447405
116.4	0.482122	0.21636	0.150828	0.053591	0.0428735
116.6	0.4827	0.216863	0.151077	0.0548655	0.043948
116.8	0.482854	0.216817	0.15082	0.054848	0.0435155
117	0.483538	0.218095	0.150789	0.0550435	0.044578
117.2	0.482942	0.216218	0.148095	0.053444	0.044429
117.4	0.483154	0.21569	0.146635	0.0527845	0.045037
117.6	0.483922	0.215824	0.147702	0.0531755	0.0451915
117.8	0.486167	0.216719	0.14849	0.0547155	0.046612
118	0.486276	0.217698	0.149636	0.056108	0.047134
118.2	0.486973	0.218309	0.151195	0.058904	0.0473605
118.4	0.487333	0.219198	0.151431	0.0598575	0.0487145
118.6	0.487097	0.219555	0.149229	0.0595775	0.048011
118.8	0.484434	0.217296	0.147262	0.0572795	0.045731
119	0.487205	0.219983	0.148497	0.05856	0.0461005
119.2	0.487905	0.222935	0.149422	0.059482	0.0472625
119.4	0.487036	0.220752	0.147737	0.057734	0.0436315
119.6	0.48742	0.221777	0.149438	0.058223	0.0443205
119.8	0.485624	0.223199	0.149697	0.058821	0.0440755
120	0.483893	0.219199	0.147245	0.0548645	0.0425535
120.2	0.484974	0.218232	0.146897	0.054285	0.042036
120.4	0.486664	0.222064	0.149971	0.057028	0.045568
120.6	0.487075	0.222203	0.151334	0.056324	0.0467855
120.8	0.488041	0.220994	0.152646	0.0573	0.04846
121	0.489935	0.223135	0.153629	0.0596205	0.049077
121.2	0.488896	0.223145	0.153408	0.059147	0.0497925
121.4	0.488546	0.222299	0.153724	0.058675	0.0494105
121.6	0.48736	0.221682	0.151187	0.0578965	0.0472325
121.8	0.487472	0.222409	0.149911	0.056912	0.0465245
122	0.485954	0.221744	0.150001	0.0564825	0.0472995
122.2	0.487296	0.222309	0.151179	0.0579	0.0465155
122.4	0.48727	0.221807	0.150071	0.0560295	0.0460415
122.6	0.486862	0.222181	0.150595	0.056572	0.046279
122.8	0.488324	0.223396	0.152332	0.058361	0.047173
123	0.489396	0.223417	0.152976	0.05824	0.047116
123.2	0.489122	0.221983	0.151157	0.056103	0.0466845
123.4	0.488357	0.221445	0.150705	0.057702	0.045972
123.6	0.489075	0.220281	0.150623	0.057568	0.046378
123.8	0.48785	0.217985	0.148843	0.05561	0.045372
124	0.487152	0.217922	0.148153	0.0558805	0.0450675
124.2	0.486606	0.218569	0.149282	0.0568865	0.0458305
124.4	0.487058	0.219588	0.150887	0.05707	0.0475945
124.6	0.488703	0.220552	0.153286	0.0595215	0.0493645
124.8	0.489507	0.220784	0.153611	0.059209	0.0483215
125	0.490246	0.220141	0.154198	0.0597535	0.048341
125.2	0.489991	0.220191	0.153751	0.05919	0.0472065
125.4	0.491129	0.219648	0.15249	0.0589895	0.0464625
125.6	0.489528	0.219059	0.150238	0.05739	0.044299
125.8	0.489034	0.220401	0.151099	0.0592195	0.0467855
126	0.488309	0.218103	0.150808	0.05817	0.0456475
126.2	0.488329	0.218021	0.151409	0.058357	0.0472065
126.4	0.487015	0.218322	0.151835	0.0574915	0.046742
126.6	0.486676	0.218888	0.151803	0.0568985	0.0460455
126.8	0.486364	0.217128	0.150798	0.055504	0.045176
127	0.485519	0.217447	0.149223	0.053639	0.0439985
127.2	0.48532	0.217524	0.14828	0.053645	0.0425405
127.4	0.486925	0.217716	0.14899	0.0546315	0.0436585
127.6	0.487627	0.218825	0.149557	0.0547905	0.0447115
127.8	0.488405	0.219601	0.14905	0.055612	0.0442125
128	0.488816	0.220232	0.149598	0.0574635	0.045254
128.2	0.489569	0.220372	0.14964	0.056429	0.04429
128.4	0.489015	0.22078	0.149477	0.0557355	0.043668
128.6	0.489481	0.219446	0.150334	0.0565375	0.045053
128.8	0.487241	0.218342	0.150962	0.055545	0.045245
129	0.48779	0.217926	0.151262	0.0547085	0.0449345
129.2	0.487977	0.21846	0.151816	0.0552905	0.046511
129.4	0.485685	0.215496	0.1497	0.0532375	0.043313
129.6	0.487081	0.218137	0.150977	0.0542885	0.0437665
129.8	0.488705	0.219252	0.151394	0.055644	0.043499
130	0.489363	0.220041	0.152585	0.05673	0.0440895
130.2	0.487886	0.217768	0.151509	0.055011	0.041233
130.4	0.488477	0.219952	0.152909	0.055929	0.044192
130.6	0.486185	0.216778	0.149131	0.0523525	0.040837
130.8	0.484723	0.215929	0.147424	0.0507135	0.0401075
131	0.483056	0.214564	0.144454	0.049011	0.0390555
131.2	0.4826	0.215696	0.144034	0.0496915	0.0415935
131.4	0.483205	0.214972	0.143703	0.0497675	0.0413585
131.6	0.484885	0.215654	0.143788	0.051304	0.0415035
131.8	0.486069	0.21641	0.145581	0.051815	0.043464
132	0.487045	0.215546	0.146603	0.0526095	0.043869
132.2	0.487897	0.214435	0.146579	0.052445	0.0431225
132.4	0.487382	0.214891	0.146243	0.0526195	0.043084
132.6	0.485308	0.214808	0.147013	0.052773	0.0438365
132.8	0.485243	0.213685	0.145457	0.050882	0.0404195
133	0.484997	0.213163	0.144981	0.050692	0.0402245
133.2	0.485051	0.213509	0.145292	0.0503575	0.0403605
133.4	0.485409	0.213753	0.146138	0.050614	0.0404875
133.6	0.485988	0.213669	0.145629	0.0497145	0.040913
133.8	0.485777	0.214909	0.146767	0.0512185	0.0432425
134	0.485071	0.213624	0.146408	0.04981	0.0416175
134.2	0.487337	0.215224	0.146839	0.0522125	0.042291
134.4	0.487563	0.213178	0.146521	0.0522235	0.0409745
134.6	0.486332	0.214775	0.145932	0.0520635	0.040138
134.8	0.489057	0.215693	0.146994	0.053889	0.0405315
135	0.48797	0.21936	0.146629	0.0542865	0.0425625
135.2	0.487423	0.221	0.146197	0.0525545	0.0421305
135.4	0.487172	0.22237	0.144971	0.0525835	0.0431925
135.6	0.488431	0.220604	0.146424	0.053013	0.042982
135.8	0.485675	0.217029	0.143668	0.0496885	0.040702
136	0.488002	0.215942	0.145871	0.0518985	0.040923
136.2	0.486729	0.213651	0.145514	0.051914	0.0405985
136.4	0.488905	0.216278	0.147667	0.0533175	0.041911
136.6	0.489549	0.217948	0.148294	0.0534935	0.0434445
136.8	0.490373	0.219768	0.148551	0.054354	0.044882
137	0.489812	0.218955	0.147641	0.053048	0.0442685
137.2	0.490337	0.219146	0.147181	0.053873	0.0448255
137.4	0.487654	0.214081	0.145094	0.051373	0.041808
137.6	0.487246	0.213351	0.144069	0.0523315	0.040715
137.8	0.486886	0.214006	0.143807	0.0530765	0.0405105
138	0.487594	0.213011	0.143163	0.052613	0.041474
138.2	0.487426	0.212698	0.142586	0.050994	0.040518
138.4	0.487717	0.216967	0.143313	0.0536525	0.0418185
138.6	0.489036	0.216826	0.145302	0.0546065	0.0441305
138.8	0.488069	0.215252	0.14484	0.053608	0.043204
139	0.486777	0.215454	0.144702	0.052856	0.0412455
139.2	0.486586	0.214956	0.145228	0.053276	0.0414745
139.4	0.488267	0.215685	0.145981	0.0536525	0.043103
139.6	0.487315	0.2164	0.144665	0.0519895	0.0408945
139.8	0.488635	0.217779	0.144856	0.0520115	0.0405935
140	0.489612	0.218426	0.143605	0.0530295	0.0414265
140.2	0.490116	0.218313	0.143569	0.05225	0.0400095
140.4	0.488524	0.214848	0.141106	0.049238	0.036644
140.6	0.488277	0.214319	0.140569	0.048929	0.037426
140.8	0.487318	0.212911	0.141439	0.0486785	0.037243
141	0.486675	0.213237	0.143113	0.049132	0.0382385
141.2	0.487071	0.213549	0.143284	0.051116	0.0398865
141.4	0.487605	0.215039	0.145098	0.05166	0.042274
141.6	0.486395	0.214914	0.143433	0.050982	0.0399265
141.8	0.486007	0.215797	0.142448	0.0507635	0.041336
142	0.489448	0.219922	0.146009	0.0538965	0.044805
142.2	0.488488	0.219868	0.147087	0.053062	0.0441315
142.4	0.486994	0.217634	0.144904	0.0514635	0.0419635
142.6	0.48898	0.216855	0.146764	0.052044	0.0437205
142.8	0.488877	0.216279	0.147173	0.0527085	0.0422185
143	0.486175	0.213756	0.145049	0.0500445	0.0396095
143.2	0.487198	0.214061	0.144113	0.050528	0.039084
143.4	0.489103	0.215248	0.145019	0.052094	0.039756
143.6	0.485613	0.213361	0.143015	0.0509245	0.037484
143.8	0.487787	0.215056	0.144628	0.051781	0.040283
144	0.489015	0.215607	0.14536	0.052819	0.040355
144.2	0.486442	0.212717	0.144112	0.0506145	0.0393995
144.4	0.486131	0.213599	0.146207	0.0522615	0.040379
144.6	0.486956	0.213198	0.145743	0.0502015	0.0396325
144.8	0.488387	0.213286	0.145791	0.050395	0.0393965
145	0.489056	0.213994	0.1444	0.050005	0.0406
145.2	0.489245	0.215929	0.145096	0.05044	0.04056
145.4	0.488656	0.216113	0.144258	0.0488675	0.041141
145.6	0.489225	0.216083	0.144074	0.0502365	0.0423005
145.8	0.486015	0.21443	0.143894	0.0480705	0.0421845
146	0.484359	0.21159	0.144409	0.0471895	0.040056
146.2	0.487231	0.211877	0.145137	0.047733	0.0412555
146.4	0.488414	0.213701	0.146337	0.0491505	0.04297
146.6	0.489611	0.214068	0.147857	0.050898	0.0444595
146.8	0.490978	0.214668	0.147556	0.052716	0.0450495
147	0.491437	0.215829	0.146517	0.051696	0.044737
147.2	0.490561	0.21627	0.146164	0.0510325	0.044102
147.4	0.491151	0.214811	0.146768	0.05187	0.0435715
147.6	0.488694	0.214047	0.14535	0.049468	0.0419485
147.8	0.488627	0.215075	0.145335	0.049437	0.040549
148	0.488537	0.21529	0.145898	0.0505745	0.0411545
148.2	0.488302	0.212332	0.14527	0.050732	0.0409615
148.4	0.487503	0.21145	0.143234	0.0483245	0.038966
148.6	0.490213	0.213838	0.14436	0.0483935	0.041048
148.8	0.489936	0.21235	0.144359	0.048785	0.0420505
149	0.489336	0.212182	0.144724	0.048696	0.042249
149.2	0.488998	0.214723	0.14545	0.0492585	0.0429665
149.4	0.488192	0.214246	0.144973	0.049072	0.042731
149.6	0.487833	0.214214	0.145187	0.0512025	0.0417125
149.8	0.488421	0.216787	0.145129	0.051298	0.041856
150	0.551127	0.20183	0.154774	0.064618	0.057099
150.2	0.490241	0.201462	0.153233	0.0631895	0.05933
150.4	0.469196	0.187487	0.146921	0.0639285	0.0558735
150.6	0.448653	0.182983	0.140336	0.061847	0.0576225
150.8	0.431445	0.173162	0.136409	0.0629455	0.0581925
151	0.413235	0.165511	0.130489	0.061177	0.0572395
151.2	0.395637	0.157723	0.125421	0.060406	0.057197
151.4	0.377981	0.150598	0.121094	0.05887	0.0577295
151.6	0.363372	0.144181	0.118739	0.0592285	0.0577915
151.8	0.348906	0.138973	0.114508	0.057263	0.057349
152	0.336895	0.134637	0.113608	0.0567775	0.057774
152.2	0.322487	0.128005	0.109996	0.0551105	0.0563675
152.4	0.311918	0.125217	0.108204	0.055095	0.056581
152.6	0.301049	0.121564	0.10537	0.0536925	0.0564815
152.8	0.290565	0.117251	0.103944	0.053234	0.055476
153	0.281902	0.115059	0.102915	0.053856	0.0571085
153.2	0.274448	0.114344	0.102211	0.054405	0.0575995
153.4	0.264999	0.109662	0.098965	0.052484	0.0564415
153.6	0.256143	0.106785	0.097113	0.050679	0.0553895
153.8	0.249532	0.105156	0.096565	0.050877	0.0561805
154	0.241683	0.100989	0.0939175	0.048134	0.053996
154.2	0.23435	0.0972155	0.0917685	0.046672	0.0528365
154.4	0.229526	0.096417	0.092269	0.047656	0.052756
154.6	0.223725	0.093403	0.0916355	0.046266	0.052195
154.8	0.218412	0.0920835	0.0906995	0.045194	0.0521165
155	0.212246	0.090677	0.0885605	0.045763	0.0513555
155.2	0.207435	0.0897225	0.0876025	0.0446355	0.051107
155.4	0.201535	0.088016	0.0864295	0.04305	0.051472
155.6	0.197277	0.0865985	0.08497	0.043664	0.050401
155.8	0.192851	0.085127	0.084596	0.043777	0.050377
156	0.189331	0.084833	0.084704	0.043545	0.049846
156.2	0.186448	0.083727	0.084924	0.044521	0.0507465
156.4	0.183358	0.0818175	0.0841885	0.0442265	0.0500415
156.6	0.17984	0.0810905	0.0835595	0.0439555	0.050391
156.8	0.176085	0.0796685	0.0822305	0.0431985	0.049418
157	0.172968	0.078144	0.082129	0.042671	0.049967
157.2	0.168832	0.076164	0.081304	0.0415985	0.048925
157.4	0.166244	0.0769275	0.080967	0.0424205	0.048992
157.6	0.163128	0.0760285	0.0806865	0.0416385	0.0482085
157.8	0.160491	0.07446	0.0802735	0.0412485	0.047692
158	0.15687	0.0737565	0.0793335	0.040503	0.047689
158.2	0.152944	0.0722625	0.0777905	0.0396885	0.0464875
158.4	0.149871	0.0699225	0.076777	0.038443	0.0454195
158.6	0.147585	0.0679755	0.075971	0.0377065	0.046027
158.8	0.145524	0.067371	0.075547	0.037707	0.0463855
159	0.142406	0.0656465	0.074362	0.036939	0.0447245
159.2	0.142885	0.0659985	0.0754815	0.037928	0.046502
159.4	0.140496	0.065914	0.074689	0.0378295	0.04687
159.6	0.138647	0.0661725	0.0751885	0.039476	0.046789
159.8	0.136169	0.065235	0.0743225	0.038738	0.046339
160	0.136495	0.065331	0.075936	0.0392635	0.0478135
160.2	0.133681	0.0651905	0.0748585	0.039737	0.0476575
160.4	0.131122	0.0640315	0.0746645	0.038638	0.0471445
160.6	0.129107	0.062749	0.0733005	0.0377505	0.047024
160.8	0.127559	0.062902	0.0729425	0.0381685	0.046479
161	0.124915	0.0630055	0.0726075	0.037948	0.0467915
161.2	0.122741	0.061269	0.0716805	0.03628	0.046372
161.4	0.121058	0.0599495	0.0712035	0.0361985	0.0459525
161.6	0.119523	0.060197	0.071291	0.0358755	0.04635
161.8	0.11791	0.0589495	0.070689	0.035134	0.0468275
162	0.116868	0.05719	0.068184	0.0343375	0.044536
162.2	0.115069	0.0569615	0.067582	0.034472	0.043813
162.4	0.114488	0.0572325	0.0684335	0.0354275	0.0446425
162.6	0.113223	0.056979	0.0687375	0.036587	0.044746
162.8	0.112049	0.0568305	0.069649	0.0371595	0.044669
163	0.110172	0.056248	0.070531	0.038067	0.0464885
163.2	0.10927	0.0548865	0.0710605	0.0377435	0.0465555
163.4	0.108597	0.0545795	0.0705265	0.0374065	0.0458655
163.6	0.108419	0.0535845	0.0701975	0.0359235	0.044906
163.8	0.10611	0.052226	0.068494	0.0351765	0.0443945
164	0.105322	0.052108	0.0687365	0.035259	0.043819
164.2	0.103732	0.0519715	0.067396	0.035099	0.0438535
164.4	0.101875	0.0506785	0.0662825	0.034593	0.04354
164.6	0.098957	0.048935	0.065299	0.034794	0.044325
164.8	0.09888	0.050084	0.065553	0.03552	0.044723
165	0.097184	0.048924	0.065338	0.0344055	0.044548
165.2	0.0969925	0.048964	0.066236	0.034934	0.044456
165.4	0.0963295	0.0497125	0.0660505	0.035462	0.045079
165.6	0.0952565	0.0496395	0.065366	0.0342275	0.0439915
165.8	0.0928175	0.046373	0.0641055	0.03198	0.0426145
166	0.0917625	0.046409	0.0640885	0.032419	0.043219
166.2	0.0907905	0.0454655	0.0638855	0.0325845	0.0430865
166.4	0.089796	0.0451775	0.064509	0.033198	0.043518
166.6	0.0892905	0.0461955	0.0649195	0.0337475	0.0436855
166.8	0.0896225	0.047807	0.066144	0.035238	0.0458465
167	0.088981	0.047626	0.0655595	0.035246	0.0453605
167.2	0.0867665	0.047114	0.063974	0.0337365	0.044455
167.4	0.085693	0.0461245	0.063346	0.032349	0.0432985
167.6	0.0843755	0.0444025	0.0620825	0.032984	0.0431645
167.8	0.08341	0.0438685	0.0617015	0.032769	0.0428685
168	0.0822435	0.0430725	0.0619	0.0329155	0.0429255
168.2	0.081837	0.043	0.0626845	0.032604	0.04337
168.4	0.0815805	0.04395	0.06334	0.033999	0.043584
168.6	0.0813585	0.044443	0.0642515	0.0330665	0.0440155
168.8	0.0800755	0.0438725	0.0639395	0.0323525	0.0427415
169	0.0780045	0.042963	0.0619325	0.0301485	0.042073
169.2	0.0778945	0.0438345	0.062319	0.0316815	0.0429715
169.4	0.0777805	0.0432495	0.0623405	0.031913	0.0438015
169.6	0.077561	0.0444685	0.0632965	0.0335695	0.04396
169.8	0.077509	0.0452245	0.063674	0.03428	0.0440215
170	0.078899	0.047448	0.0657455	0.036568	0.045144
170.2	0.0781965	0.047339	0.0654885	0.0353865	0.0444025
170.4	0.0753475	0.0459195	0.064005	0.0338165	0.0428055
170.6	0.073992	0.04411	0.062636	0.032283	0.0428205
170.8	0.074265	0.0439305	0.062806	0.0325195	0.0435515
171	0.073518	0.0431135	0.061867	0.031389	0.0432505
171.2	0.0720535	0.0410975	0.0604555	0.0312185	0.042489
171.4	0.0725215	0.041499	0.061937	0.031725	0.0441295
171.6	0.0713905	0.040326	0.061366	0.031497	0.043307
171.8	0.0689395	0.038819	0.060279	0.0303635	0.041788
172	0.0683475	0.0375695	0.0598125	0.0309315	0.04203
172.2	0.0692205	0.0388465	0.0610065	0.0317605	0.043429
172.4	0.0669985	0.0369365	0.0582475	0.029728	0.0412385
172.6	0.0677135	0.0381485	0.0591985	0.030841	0.0418965
172.8	0.066841	0.0382385	0.0592185	0.0302675	0.042347
173	0.0659405	0.0382585	0.0596785	0.030493	0.041976
173.2	0.0646835	0.0374735	0.0593065	0.030354	0.0412265
173.4	0.064911	0.037978	0.0612285	0.031617	0.0423125
173.6	0.063671	0.03732	0.0614155	0.031113	0.0420185
173.8	0.063723	0.037012	0.0610685	0.0320985	0.041993
174	0.0610575	0.0358005	0.059547	0.0302025	0.040664
174.2	0.0604615	0.035395	0.058844	0.0299705	0.041232
174.4	0.0598385	0.0350105	0.0570685	0.0290035	0.0400245
174.6	0.059627	0.0346245	0.05647	0.0284705	0.040125
174.8	0.0591425	0.034806	0.056923	0.0286545	0.040582
175	0.0607925	0.035881	0.0577455	0.029985	0.04129
175.2	0.0610915	0.035996	0.0582025	0.02942	0.041336
175.4	0.060398	0.0355755	0.058427	0.0299325	0.041795
175.6	0.0593325	0.03533	0.0573405	0.030159	0.041816
175.8	0.058754	0.0343805	0.0570185	0.030034	0.040884
176	0.058489	0.0330995	0.057537	0.0301115	0.0416825
176.2	0.058056	0.0335265	0.05832	0.0311065	0.041848
176.4	0.058065	0.033454	0.0590715	0.0313955	0.042009
176.6	0.0579815	0.0332105	0.0590805	0.0309575	0.04117
176.8	0.057983	0.0335815	0.059059	0.0305905	0.0419905
177	0.0564195	0.033015	0.05719	0.03048	0.041073
177.2	0.0553415	0.032018	0.056271	0.0303415	0.040841
177.4	0.0545915	0.0323975	0.0561745	0.03019	0.0409285
177.6	0.054198	0.0319645	0.0566895	0.0303955	0.041736
177.8	0.0529175	0.0313915	0.055927	0.030188	0.0411575
178	0.053102	0.0330735	0.0567435	0.0299775	0.0410155
178.2	0.0528675	0.033467	0.057037	0.029649	0.0409525
178.4	0.053258	0.033902	0.0567365	0.0300525	0.0420805
178.6	0.0534065	0.0351495	0.057112	0.030578	0.0422715
178.8	0.05293	0.034916	0.05691	0.0309155	0.042626
179	0.0530415	0.0341485	0.0574525	0.031834	0.044063
179.2	0.0521265	0.033218	0.055704	0.031055	0.043066
179.4	0.05137	0.032561	0.0560555	0.0305505	0.041967
179.6	0.0498025	0.0314555	0.054221	0.029649	0.0407085
179.8	0.0496925	0.0320205	0.055149	0.030055	0.0406905
180	0.049539	0.0313925	0.0551065	0.0294395	0.040063
180.2	0.0504595	0.0319855	0.056961	0.030858	0.041155
180.4	0.04973	0.0325055	0.056637	0.031076	0.041325
180.6	0.0509205	0.032821	0.0586975	0.0326805	0.0429825
180.8	0.050143	0.0317195	0.0581465	0.0314445	0.042514
181	0.0495375	0.0323205	0.0582995	0.0320855	0.0430705
181.2	0.0488335	0.032919	0.0576675	0.032439	0.0432965
181.4	0.049229	0.0329525	0.058247	0.031896	0.042984
181.6	0.0478945	0.032787	0.057415	0.031569	0.0422945
181.8	0.048681	0.0332955	0.057378	0.0327755	0.042552
182	0.048874	0.033277	0.0577065	0.0331545	0.042663
182.2	0.0471995	0.031414	0.05681	0.031034	0.0407025
182.4	0.0460475	0.0308355	0.055973	0.032224	0.0414525
182.6	0.045868	0.030422	0.055227	0.031363	0.041268
182.8	0.04592	0.031101	0.0562055	0.031856	0.0421615
183	0.045384	0.0305495	0.055732	0.0311865	0.041467
183.2	0.045547	0.0315685	0.056299	0.0312745	0.042492
183.4	0.045462	0.031646	0.056168	0.030766	0.042292
183.6	0.04437	0.030874	0.056237	0.030662	0.0420885
183.8	0.043682	0.030264	0.0558045	0.030056	0.04178
184	0.043451	0.0311965	0.05585	0.030285	0.0422795
184.2	0.042862	0.030319	0.056246	0.031032	0.0427465
184.4	0.042162	0.029983	0.0563625	0.030992	0.042848
184.6	0.042204	0.0306265	0.056007	0.0307835	0.0423915
184.8	0.0418625	0.030863	0.0561565	0.0303995	0.0421665
185	0.0401715	0.029347	0.055272	0.0287515	0.0410695
185.2	0.040251	0.0292145	0.0543775	0.0287835	0.0403265
185.4	0.0406925	0.0295	0.0542535	0.028834	0.039537
185.6	0.039762	0.0283325	0.053921	0.028165	0.0393285
185.8	0.039254	0.0274025	0.052856	0.027965	0.0388075
186	0.03867	0.0276455	0.052506	0.0277245	0.0388355
186.2	0.037122	0.0272435	0.0515965	0.0268295	0.0373025
186.4	0.0364785	0.026901	0.052203	0.027524	0.038259
186.6	0.036308	0.027863	0.0521945	0.027537	0.0383775
186.8	0.035499	0.0280665	0.0525725	0.0272575	0.037808
187	0.0360415	0.0273565	0.0519495	0.027572	0.0372595
187.2	0.0366865	0.027291	0.0520625	0.027892	0.0385385
187.4	0.036261	0.0278345	0.0514745	0.0276035	0.0380405
187.6	0.0366355	0.0276925	0.0517215	0.028342	0.038628
187.8	0.036949	0.0277075	0.051778	0.0286305	0.0392125
188	0.036611	0.0279075	0.051712	0.0286695	0.0393655
188.2	0.0363005	0.027834	0.0526445	0.02879	0.0388425
188.4	0.035979	0.026305	0.051556	0.0277785	0.037554
188.6	0.0353805	0.026175	0.052234	0.0284625	0.0379515
188.8	0.0343195	0.0260655	0.0518985	0.028311	0.0371535
189	0.033982	0.0259895	0.052304	0.0278825	0.0372915
189.2	0.034275	0.0261375	0.0525335	0.028424	0.0379105
189.4	0.0342195	0.0273805	0.0537585	0.029453	0.0398465
189.6	0.0333045	0.0269415	0.052169	0.0277185	0.038828
189.8	0.0332175	0.0252075	0.051139	0.027608	0.038401
190	0.0324365	0.0254965	0.0507075	0.0278795	0.038286
190.2	0.0330525	0.0261365	0.051589	0.0281005	0.0390195
190.4	0.032658	0.0250555	0.0505495	0.027339	0.0370875
190.6	0.032727	0.0247685	0.0514125	0.0280865	0.0373045
190.8	0.0333035	0.026672	0.0528815	0.0291355	0.0393135
191	0.0332975	0.026488	0.0525805	0.029469	0.0399585
191.2	0.0322635	0.0248405	0.0507325	0.029068	0.039341
191.4	0.031816	0.0254935	0.051338	0.0295115	0.0405695
191.6	0.031956	0.0255985	0.050199	0.0292255	0.0410005
191.8	0.031848	0.025432	0.050416	0.02901	0.040964
192	0.0323685	0.024866	0.050662	0.028954	0.040025
192.2	0.031665	0.02524	0.0502685	0.0276955	0.0394435
192.4	0.0330365	0.0246645	0.0500115	0.0284225	0.039208
192.6	0.032831	0.024934	0.0508115	0.0290245	0.0385995
192.8	0.0322405	0.02457	0.050704	0.028496	0.0387455
193	0.0321725	0.0256115	0.0516075	0.0298635	0.039755
193.2	0.0322695	0.0257925	0.052372	0.031007	0.040645
193.4	0.032209	0.0259955	0.05224	0.0302785	0.041317
193.6	0.031965	0.025756	0.051343	0.02969	0.0404465
193.8	0.031832	0.0249795	0.0508455	0.0298925	0.0398055
194	0.031728	0.0239215	0.050665	0.0285185	0.0395385
194.2	0.0324395	0.0241355	0.051526	0.028721	0.0398265
194.4	0.0312655	0.0238805	0.0514265	0.028777	0.039355
194.6	0.030921	0.023746	0.052333	0.0290265	0.0410825
194.8	0.0303485	0.023731	0.052198	0.028567	0.0405815
195	0.029308	0.0242675	0.05151	0.0295525	0.0405525
195.2	0.0298445	0.0240985	0.050271	0.029896	0.0400655
195.4	0.0300485	0.024352	0.051192	0.0302625	0.0411795
195.6	0.0305655	0.024377	0.051063	0.031317	0.0414935
195.8	0.0318445	0.0245505	0.05134	0.0322255	0.0418985
196	0.0324715	0.0247345	0.0521905	0.0314275	0.0422865
196.2	0.0304595	0.0232975	0.052446	0.0311775	0.042341
196.4	0.02976	0.021858	0.051319	0.0303155	0.041114
196.6	0.030294	0.022248	0.05172	0.0303635	0.041023
196.8	0.02935	0.0217175	0.0512	0.029815	0.0402345
197	0.0300115	0.0222525	0.0513425	0.031545	0.041496
197.2	0.0303855	0.0237465	0.0513275	0.031553	0.0419245
197.4	0.0305455	0.024988	0.051423	0.0320015	0.041639
197.6	#VALUE!	0.024272	0.051493	0.031535	0.0415395
197.8	0.02905	0.0246175	0.050976	0.031885	0.042724
198	0.028191	0.0248645	0.051344	0.0304085	0.042491
198.2	0.0287575	0.024402	0.051151	0.030883	0.042093
198.4	0.0279745	0.02348	0.05121	0.030426	0.042573
198.6	0.0273135	0.0234985	0.051512	0.030152	0.0421245
198.8	0.0270315	0.02386	0.0519825	0.0303845	0.0416585
199	0.0263355	0.023672	0.051182	0.030775	0.041039
199.2	0.0259515	0.0246	0.0510975	0.030389	0.0412715
199.4	0.0265335	0.0249705	0.0516265	0.0313295	0.0409385
199.6	0.02682	0.024781	0.0518415	0.031675	0.0414965
199.8	0.026898	0.024512	0.0518465	0.0310935	0.0408005
200	0.0272765	0.023894	0.052605	0.0311725	0.0405835
200.2	0.027029	0.023722	0.0536265	0.031678	0.040072
200.4	0.0255125	0.022819	0.052311	0.030926	0.039713
200.6	0.024749	0.022893	0.0509895	0.0309715	0.0387155
200.8	0.024237	0.023675	0.050617	0.031518	0.0401035
201	0.024189	0.023264	0.0500765	0.031939	0.0402145
201.2	0.0241085	0.022631	0.0492015	0.0315845	0.040789
201.4	0.025665	0.0236635	0.050155	0.031888	0.040705
201.6	0.0253875	0.0237565	0.0498065	0.0306855	0.0413785
201.8	0.026031	0.022532	0.0502865	0.0304545	0.040877
202	0.025777	0.0223325	0.0504805	0.0303385	0.0414165
202.2	0.025673	0.022541	0.05089	0.0306185	0.042815
202.4	0.024027	0.0219225	0.0506575	0.030706	0.0424045
202.6	0.023967	0.022378	0.0511195	0.030973	0.0423385
202.8	0.0240805	0.023146	0.052112	0.0313685	0.0425075
203	0.02426	0.0234195	0.0515235	0.030778	0.041689
203.2	0.0236655	0.022372	0.0505505	0.0300995	0.0395905
203.4	0.023349	0.0218165	0.0494825	0.028574	0.039646
203.6	0.023567	0.02102	0.0497615	0.0290875	0.039779
203.8	0.0227935	0.0198505	0.0480975	0.028455	0.0396515
204	0.022236	0.0186115	0.0481205	0.027609	0.038535
204.2	0.022928	0.01993	0.0497105	0.0291645	0.040342
204.4	0.0235235	0.0198235	0.0498855	0.030091	0.0406735
204.6	0.0225445	0.0190465	0.0488625	0.029603	0.0397
204.8	0.022728	0.019702	0.0490845	0.030221	0.039822
205	0.0221315	0.0200815	0.0489415	0.030184	0.0399295
205.2	0.020841	0.018897	0.0471945	0.0285065	0.038333
205.4	0.0203815	0.0203975	0.047964	0.0291045	0.0394685
205.6	0.0205185	0.0203875	0.048505	0.0287355	0.0398945
205.8	0.0200395	0.0200415	0.047699	0.0278615	0.0392685
206	0.0191545	0.0199625	0.047523	0.028536	0.038974
206.2	0.0190265	0.0198695	0.0468395	0.0288995	0.0387905
206.4	0.019195	0.018495	0.0461775	0.0282125	0.037361
206.6	0.018497	0.018743	0.0454295	0.0284945	0.0367445
206.8	0.018592	0.019019	0.0462445	0.0291945	0.036761
207	0.0197935	0.019494	0.0460515	0.029443	0.038452
207.2	0.019554	0.0188835	0.0470035	0.0290515	0.0385035
207.4	0.020145	0.018738	0.0476525	0.029881	0.0396295
207.6	0.019568	0.018441	0.0474675	0.0293865	0.03956
207.8	0.020011	0.018522	0.0471405	0.02993	0.039794
208	0.0195455	0.0176825	0.047152	0.030004	0.038987
208.2	0.0193115	0.0183705	0.0473705	0.0301645	0.03917
208.4	0.019401	0.019291	0.047643	0.030181	0.0390925
208.6	0.0208005	0.0200045	0.0482915	0.0316045	0.0401535
208.8	0.020339	0.01977	0.0493915	0.031536	0.0403705
209	0.019764	0.019457	0.049639	0.031105	0.0400205
209.2	0.0191465	0.0185675	0.048339	0.030286	0.0392815
209.4	0.018042	0.0179865	0.0477085	0.030059	0.0391705
209.6	0.0170745	0.0169735	0.0476705	0.0291385	0.038482
209.8	0.016628	0.016807	0.046954	0.0284755	0.038445
210	0.0168425	0.017208	0.04702	0.0282605	0.039025
210.2	0.0171615	0.0172085	0.0476075	0.029371	0.0393385
210.4	0.0167475	0.0168355	0.0466545	0.0287055	0.038604
210.6	0.016583	0.017021	0.04631	0.0282095	0.038524
210.8	0.0156015	0.0162	0.0460535	0.027329	0.037463
211	0.0155615	0.016017	0.046438	0.0282385	0.0370855
211.2	0.0149265	0.016071	0.0457865	0.02733	0.0366185
211.4	0.014518	0.0162255	0.0467	0.0281555	0.036067
211.6	0.0148515	0.01666	0.047761	0.028477	0.036488
211.8	0.015013	0.0169055	0.047387	0.0291825	0.0369485
212	0.014889	0.016862	0.0465215	0.028509	0.0375305
212.2	0.0163635	0.018563	0.048823	0.030005	0.0393135
212.4	0.016481	0.0183075	0.048794	0.0290555	0.0398445
212.6	0.016214	0.018176	0.047534	0.0296375	0.040082
212.8	0.0160055	0.017914	0.047599	0.02985	0.0402185
213	0.015866	0.0176135	0.0473635	0.029707	0.0396245
213.2	0.014278	0.0157865	0.0446725	0.027903	0.0378895
213.4	0.014005	0.0160075	0.044521	0.028734	0.03783
213.6	0.0138075	0.016152	0.044418	0.0282725	0.0372255
213.8	0.013291	0.0156105	0.044258	0.027515	0.036706
214	0.0126815	0.015928	0.0449085	0.0276325	0.0366765
214.2	0.013461	0.016737	0.046102	0.0283405	0.037635
214.4	0.013552	0.015484	0.045189	0.027464	0.037464
214.6	0.0132355	0.0156605	0.045521	0.028373	0.03764
214.8	0.0130605	0.0157045	0.044997	0.0289435	0.0378955
215	0.0128985	0.015925	0.044742	0.0298785	0.038079
215.2	0.0129	0.0155915	0.044565	0.029713	0.038253
215.4	0.013758	0.017265	0.0455395	0.0312355	0.0389995
215.6	0.0138545	0.017221	0.04608	0.031662	0.0397065
215.8	0.014095	0.017366	0.046548	0.031328	0.039691
216	0.013985	0.016778	0.0463485	0.030407	0.0398765
216.2	0.0139415	0.0166075	0.046681	0.0312165	0.039288
216.4	0.0128455	0.0155545	0.0466015	0.030238	0.0390195
216.6	0.01197	0.0155745	0.045588	0.0289775	0.038306
216.8	0.0113105	0.015216	0.045038	0.0285505	0.0379325
217	0.010948	0.014874	0.0445395	0.028558	0.037868
217.2	0.0100825	0.0153665	0.0437665	0.0285595	0.0379975
217.4	0.009101	0.013951	0.043472	0.0274195	0.037479
217.6	0.0099785	0.0142885	0.0440065	0.0286915	0.0383905
217.8	0.0097335	0.0135635	0.043555	0.0284755	0.037922
218	0.0106225	0.014079	0.0446485	0.0289285	0.0383015
218.2	0.010828	0.0136195	0.0445475	0.0276185	0.037797
218.4	0.01207	0.0160365	0.0438925	0.028974	0.0386395
218.6	0.0110695	0.0141185	0.0429045	0.0271925	0.0369005
218.8	0.013076	0.016107	0.0451125	0.0288815	0.0390555
219	0.0119295	0.015705	0.043584	0.0278535	0.038416
219.2	0.0112715	0.014841	0.043898	0.027568	0.038632
219.4	0.011275	0.0146035	0.0447235	0.027985	0.038742
219.6	0.011277	0.0151405	0.0456435	0.028206	0.0389455
219.8	0.0102685	0.014236	0.044285	0.0274	0.0384485
220	0.0102545	0.014246	0.04465	0.0280585	0.038066
220.2	0.009833	0.013694	0.0438355	0.0277455	0.038263
220.4	0.01027	0.0131075	0.043965	0.027055	0.039053
220.6	0.0099915	0.0125745	0.0433625	0.0272025	0.039372
220.8	0.009823	0.0129285	0.042832	0.026789	0.037997
221	0.010601	0.0137175	0.0439255	0.0270885	0.040066
221.2	0.012655	0.0150285	0.045695	0.0283535	0.040405
221.4	0.0126765	0.015861	0.0455145	0.0289715	0.03984
221.6	0.011819	0.0157045	0.0454665	0.0282225	0.0394685
221.8	0.0117145	0.0152035	0.0457085	0.028467	0.038982
222	0.011606	0.0156375	0.044785	0.028538	0.0379985
222.2	0.010255	0.015772	0.043964	0.0289435	0.0377935
222.4	0.009654	0.0150495	0.0435645	0.0281975	0.037307
222.6	0.011342	0.016064	0.0446455	0.029166	0.038339
222.8	0.0112275	0.0163625	0.045068	0.029455	0.039428
223	0.0100825	0.014363	0.044199	0.0279315	0.0379535
223.2	0.009628	0.0135755	0.043243	0.0269355	0.0369865
223.4	0.0099945	0.01321	0.043254	0.0271615	0.0373945
223.6	0.009538	0.013602	0.042504	0.0272495	0.0371375
223.8	0.0106225	0.0151055	0.0428235	0.0282655	0.038009
224	0.0115155	0.01676	0.044599	0.0299825	0.039426
224.2	0.012392	0.0174415	0.0454815	0.030729	0.040685
224.4	0.0115375	0.017494	0.045297	0.0310745	0.040308
224.6	0.009822	0.016104	0.044888	0.029495	0.0391695
224.8	0.008834	0.0140485	0.044918	0.028333	0.0383155
225	0.0062875	0.012186	0.042802	0.0269235	0.035893
225.2	0.005322	0.011203	0.042101	0.0261645	0.034583
225.4	0.0035055	0.0101455	0.0413985	0.0249175	0.0332835
225.6	0.00428	0.010503	0.040934	0.025467	0.0332275
225.8	0.004229	0.0117895	0.0416855	0.0256875	0.033703
226	0.0061615	0.012376	0.042918	0.0264115	0.035595
226.2	0.006631	0.0138795	0.043914	0.027611	0.036493
226.4	0.007647	0.0141075	0.0443495	0.0274555	0.0364905
226.6	0.008772	0.014815	0.045681	0.028271	0.0377715
226.8	0.009005	0.014427	0.044699	0.0281865	0.03717
227	0.0099605	0.015818	0.0453985	0.028907	0.0380075
227.2	0.0094715	0.014393	0.0444995	0.027869	0.037059
227.4	0.0098945	0.0145305	0.0442185	0.028614	0.037729
227.6	0.0092775	0.0151295	0.0441545	0.02936	0.0369145
227.8	0.009029	0.014428	0.0438405	0.028201	0.036824
228	0.006785	0.0131435	0.041969	0.025881	0.0349165
228.2	0.0079105	0.013887	0.0425275	0.027066	0.0359115
228.4	0.0071565	0.01412	0.0427135	0.0263805	0.03548
228.6	0.006735	0.0124245	0.0424015	0.024917	0.0356655
228.8	0.006087	0.0125985	0.042389	0.0262045	0.035012
229	0.007106	0.0122145	0.043718	0.027469	0.0352965
229.2	0.005746	0.0107915	0.042193	0.025234	0.034699
229.4	0.0061125	0.010761	0.042001	0.025295	0.035616
229.6	0.0073635	0.012179	0.042205	0.026752	0.0358535
229.8	0.006937	0.0113995	0.041772	0.025136	0.0359205
230	0.0073865	0.0122415	0.0418175	0.025837	0.0370655
230.2	0.007256	0.0120295	0.042657	0.026818	0.0362785
230.4	0.006615	0.0117755	0.0428585	0.0264155	0.035529
230.6	0.0055325	0.0110735	0.0425445	0.025595	0.0357365
230.8	0.0069685	0.012274	0.0428685	0.0273355	0.0373615
231	0.0051995	0.011683	0.041195	0.0257845	0.035908
231.2	0.0063955	0.013502	0.0418795	0.026489	0.037104
231.4	0.005983	0.012806	0.0407945	0.0265435	0.03625
231.6	0.0060255	0.0140385	0.0415335	0.0262625	0.0366
231.8	0.0048415	0.0129495	0.041753	0.025545	0.035945
232	0.0048935	0.0125225	0.0418075	0.0258025	0.035938
232.2	0.003388	0.0111965	0.040793	0.024026	0.035607
232.4	0.00439	0.0114515	0.0420985	0.024594	0.036572
232.6	0.005473	0.0107975	0.041658	0.025975	0.0367845
232.8	0.005297	0.010543	0.0410215	0.0254625	0.036336
233	0.0074555	0.0125375	0.043327	0.027288	0.038343
233.2	0.007559	0.012459	0.043314	0.026991	0.0376735
233.4	0.009101	0.0133205	0.044093	0.028336	0.038651
233.6	0.00683	0.0119885	0.043052	0.026177	0.0371625
233.8	0.0071045	0.0123145	0.042688	0.026016	0.0368495
234	0.005814	0.010875	0.0415125	0.0246675	0.0352535
234.2	0.0065425	0.011279	0.0420335	0.0263475	0.03637
234.4	0.0052425	0.0114475	0.0411745	0.025339	0.0361515
234.6	0.0053095	0.0115275	0.041624	0.0253175	0.0365695
234.8	0.0056295	0.012464	0.0428045	0.02653	0.0379925
235	0.0059425	0.013243	0.043809	0.027239	0.038797
235.2	0.005709	0.0133805	0.0440895	0.027301	0.038785
235.4	0.0052075	0.0123055	0.04414	0.026315	0.037828
235.6	0.0055405	0.013113	0.0436	0.02689	0.0379295
235.8	0.0050845	0.0116405	0.042822	0.026873	0.037064
236	0.0064035	0.0128305	0.043274	0.027255	0.0382205
236.2	0.006609	0.013089	0.0435525	0.0272375	0.038598
236.4	0.0060325	0.0133455	0.043141	0.0280855	0.0383105
236.6	0.0068955	0.014621	0.0451885	0.0295115	0.0393575
236.8	0.007494	0.016067	0.0462125	0.029818	0.039687
237	0.0058055	0.013893	0.0444635	0.0289105	0.0376335
237.2	0.0060005	0.0141995	0.044099	0.0287555	0.037352
237.4	0.006531	0.014254	0.044652	0.02861	0.0377595
237.6	0.0065685	0.0131395	0.0435685	0.0277765	0.0377415
237.8	0.0064975	0.01305	0.0437095	0.0274115	0.037887
238	0.0066085	0.013049	0.04418	0.0273575	0.038669
238.2	0.0066725	0.012021	0.0442545	0.0273225	0.0391665
238.4	0.0082495	0.0139315	0.0454965	0.0287505	0.040766
238.6	0.0086515	0.014333	0.045384	0.029035	0.042262
238.8	0.0087875	0.013916	0.0448365	0.028754	0.042075
239	0.010227	0.014503	0.045822	0.029574	0.0431275
239.2	0.0092275	0.015136	0.0455505	0.0287425	0.042276
239.4	0.0080545	0.0139845	0.044172	0.027611	0.0413865
239.6	0.007259	0.012789	0.043228	0.0264185	0.039412
239.8	0.006742	0.0130075	0.0434775	0.027348	0.0401725
240	0.0056375	0.0136115	0.0431845	0.0263865	0.039576
240.2	0.006118	0.013479	0.043776	0.027044	0.040411
240.4	0.006623	0.013408	0.0442345	0.0276275	0.0415075
240.6	0.0071995	0.013393	0.045178	0.0280915	0.041225
240.8	0.0072545	0.0129435	0.045015	0.027063	0.040814
241	0.007185	0.0132395	0.0450995	0.0282935	0.0412535
241.2	0.007763	0.013934	0.0458675	0.029455	0.0415315
241.4	0.007679	0.0136785	0.045875	0.028938	0.041454
241.6	0.0066345	0.014816	0.0462425	0.028504	0.042361
241.8	0.006133	0.014331	0.0453515	0.028478	0.041461
242	0.0061785	0.0135595	0.046003	0.0282315	0.041778
242.2	0.004895	0.012276	0.044639	0.0265915	0.04065
242.4	0.0041985	0.0116645	0.043621	0.0260915	0.0392075
242.6	0.004328	0.010946	0.0439185	0.0269205	0.0393735
242.8	0.0042605	0.0116985	0.0438025	0.0270505	0.0404415
243	0.004712	0.012044	0.0427975	0.0261395	0.039307
243.2	0.0042665	0.012327	0.042765	0.0267645	0.0394665
243.4	0.0033005	0.012545	0.0425525	0.0264545	0.0400965
243.6	0.002582	0.011713	0.0422645	0.025033	0.0386665
243.8	0.0037765	0.01235	0.043229	0.0257275	0.038866
244	0.002731	0.011996	0.0431335	0.025979	0.0393355
244.2	0.005066	0.012812	0.044601	0.0272675	0.0409735
244.4	0.005268	0.012901	0.0452775	0.027763	0.040885
244.6	0.006789	0.0140755	0.044205	0.0288965	0.041777
244.8	0.0066935	0.0138185	0.044963	0.0291315	0.0419545
245	0.0067445	0.013846	0.04446	0.0287755	0.041758
245.2	0.005526	0.0134995	0.0444195	0.027947	0.040719
245.4	0.005724	0.0135045	0.0443445	0.027567	0.040168
245.6	0.0053845	0.014021	0.046063	0.0277455	0.040372
245.8	0.005302	0.0140495	0.0459505	0.028299	0.0405465
246	0.005578	0.013373	0.04534	0.0276905	0.0396525
246.2	0.005085	0.012362	0.0445665	0.027551	0.0397035
246.4	0.0055735	0.0130085	0.0448355	0.0282055	0.040455
246.6	0.0048615	0.012846	0.044819	0.0287365	0.0407925
246.8	0.0045115	0.012257	0.043281	0.027545	0.0395305
247	0.0036755	0.012766	0.0448605	0.0281525	0.0402305
247.2	0.0056145	0.014271	0.047059	0.029298	0.0411965
247.4	0.0049715	0.0138905	0.0470055	0.0290915	0.0400965
247.6	0.004699	0.013556	0.047115	0.0282095	0.039355
247.8	0.0056385	0.0146255	0.048999	0.029143	0.040076
248	0.006864	0.01524	0.048985	0.0301855	0.040392
248.2	0.0044615	0.014051	0.047094	0.0280735	0.0378895
248.4	0.0056435	0.0143665	0.04756	0.028747	0.039149
248.6	0.006028	0.0140265	0.0472175	0.0288815	0.040234
248.8	0.00334	0.0127605	0.045546	0.027543	0.039495
249	0.002681	0.0125225	0.0452705	0.027066	0.0390105
249.2	0.0031965	0.0129175	0.0446945	0.027357	0.040311
249.4	0.0020415	0.0126275	0.0442475	0.026516	0.039631
249.6	0.001814	0.012602	0.043141	0.0273035	0.0383615
249.8	0.003775	0.0138045	0.0444595	0.028806	0.039335
250	0.003551	0.0137725	0.044022	0.0287005	0.039641
250.2	0.003581	0.014146	0.044403	0.0294745	0.040282
250.4	0.004606	0.0149255	0.0446095	0.030784	0.0407595
250.6	0.005042	0.0159965	0.046243	0.0311095	0.0410965
250.8	0.0046685	0.015178	0.045218	0.029765	0.0407515
251	0.00478	0.0147185	0.0457685	0.0289055	0.040951
251.2	0.0050465	0.0150485	0.046412	0.0296035	0.0401625
251.4	0.0051365	0.014266	0.046383	0.028813	0.0399075
251.6	0.004676	0.012949	0.044919	0.0284165	0.039897
251.8	0.0048635	0.012567	0.045121	0.028181	0.0390195
252	0.004788	0.012576	0.044504	0.028827	0.03816
252.2	0.004529	0.0114835	0.043415	0.0276485	0.0375135
252.4	0.00359	0.0111915	0.0439735	0.02679	0.0364605
252.6	0.003875	0.011105	0.0450425	0.02684	0.037043
252.8	0.003102	0.011585	0.0445755	0.026658	0.0369965
253	0.0035945	0.012029	0.0448695	0.026202	0.0375055
253.2	0.0023435	0.011964	0.044102	0.0253655	0.0371425
253.4	0.00236	0.0119335	0.042786	0.0251455	0.0375915
253.6	0.002514	0.0121115	0.0420395	0.024869	0.037129
253.8	0.002612	0.012113	0.042339	0.0262105	0.037697
254	0.0017315	0.011339	0.0412815	0.0267595	0.037196
254.2	0.0027065	0.0115935	0.042415	0.028084	0.037836
254.4	0.0029955	0.010976	0.0419325	0.027355	0.03753
254.6	0.0018505	0.0104685	0.04168	0.026707	0.0369345
254.8	0.001398	0.0093925	0.040867	0.0262215	0.0358755
255	0.000899	0.0097485	0.041685	0.026047	0.035766
255.2	0.0014375	0.009867	0.0418905	0.0266855	0.0366775
255.4	0.000415	0.009525	0.0421695	0.026758	0.036435
255.6	0.000876	0.0097555	0.0414225	0.0261175	0.0367285
255.8	0.0014105	0.010028	0.04212	0.02555	0.037093
256	0.002667	0.010399	0.041817	0.0262695	0.037614
256.2	0.0032175	0.011718	0.0426345	0.026764	0.0375135
256.4	0.003676	0.012033	0.043002	0.028075	0.037996
256.6	0.004071	0.0120525	0.043538	0.028348	0.0383345
256.8	0.0045475	0.01264	0.0433915	0.029683	0.038984
257	0.0031795	0.011241	0.042714	0.0282935	0.0375865
257.2	0.001734	0.008766	0.040951	0.0255325	0.0363305
257.4	0.0017515	0.00922	0.040414	0.024555	0.0357635
257.6	0.001374	0.009157	0.040897	0.0251685	0.035276
257.8	-0.000416	0.0079685	0.039985	0.0228925	0.033902
258	0.000689	0.0090945	0.040469	0.023036	0.0349755
258.2	0.0017505	0.0101345	0.0404335	0.0251805	0.035633
258.4	0.002258	0.010701	0.04076	0.0264765	0.037068
258.6	0.00223	0.010356	0.040714	0.0260405	0.0376055
258.8	0.003588	0.011411	0.041792	0.027554	0.0386015
259	0.003012	0.011038	0.042625	0.0279115	0.0384105
259.2	0.002784	0.010904	0.0432745	0.027989	0.0384925
259.4	0.0022985	0.010598	0.043676	0.0277395	0.03852
259.6	0.0022545	0.010598	0.0433405	0.027741	0.038275
259.8	0.0019815	0.009835	0.042324	0.026754	0.0383895
260	0.0016705	0.0096615	0.0415345	0.0264645	0.037597
260.2	0.0010455	0.0101295	0.0415845	0.0260655	0.0379755
260.4	0.000491	0.0095605	0.040773	0.025377	0.037234
260.6	0.000389	0.010471	0.040413	0.0254825	0.0371825
260.8	0.000275	0.0111655	0.041533	0.026614	0.037273
261	0.0011125	0.0114855	0.041102	0.0269475	0.0381085
261.2	0.0021855	0.01145	0.0408145	0.0266585	0.0376545
261.4	0.0033	0.0118935	0.041143	0.027303	0.037025
261.6	0.0039435	0.0117525	0.04249	0.0282965	0.0376345
261.8	0.0049235	0.0117425	0.042159	0.028433	0.038196
262	0.0041675	0.011051	0.042176	0.028019	0.038029
262.2	0.003002	0.010703	0.042278	0.0271455	0.0374455
262.4	0.0020065	0.010069	0.041319	0.0265585	0.036923
262.6	0.001706	0.0086065	0.0392165	0.025658	0.0359195
262.8	0.00019	0.007913	0.0391455	0.025168	0.0339915
263	0.000362	0.009109	0.0397285	0.025891	0.0344725
263.2	0.0004765	0.009138	0.03938	0.0265	0.0353395
263.4	0.000386	0.0089425	0.0395445	0.026417	0.035379
263.6	-0.000284	0.009092	0.040688	0.026108	0.0351435
263.8	0.00061	0.010499	0.041266	0.026317	0.03667
264	0.0002455	0.009102	0.0407975	0.0254805	0.035807
264.2	0.0003195	0.0089575	0.0415655	0.025668	0.0348525
264.4	0.0014615	0.010594	0.0427155	0.0266745	0.0365015
264.6	0.002978	0.012231	0.0433855	0.0278825	0.037429
264.8	0.0036615	0.011791	0.043525	0.028382	0.0373645
265	0.0052395	0.0134385	0.0446235	0.030058	0.0391335
265.2	0.004545	0.013321	0.0445795	0.029599	0.0401595
265.4	0.003575	0.011467	0.0440895	0.0291055	0.0388395
265.6	0.0027715	0.011264	0.044147	0.0284595	0.0390425
265.8	0.0008345	0.010394	0.0422105	0.02657	0.037648
266	-0.0005675	0.00901	0.04147	0.0256655	0.036891
266.2	0.000214	0.008763	0.0409745	0.0260015	0.0353325
266.4	0.000964	0.010058	0.0411935	0.0260945	0.036746
266.6	0.000771	0.01009	0.041347	0.026061	0.036786
266.8	0.0019545	0.0100755	0.042792	0.0278365	0.0380215
267	0.0022435	0.0112525	0.042856	0.027332	0.037834
267.2	0.002426	0.0121575	0.042678	0.0280885	0.0392925
267.4	0.001488	0.011474	0.041912	0.0272525	0.037989
267.6	0.0008335	0.010531	0.041155	0.0272765	0.0374245
267.8	0.0005585	0.011599	0.040438	0.0266485	0.0372745
268	0.0002565	0.010166	0.040419	0.026558	0.0365685
268.2	-0.000379	0.009171	0.0409195	0.026034	0.036531
268.4	-0.000642	0.009219	0.0416205	0.026532	0.0370345
268.6	-0.000625	0.008981	0.0412585	0.026014	0.036405
268.8	-0.000507	0.0086495	0.041096	0.0268135	0.035504
269	-0.0013115	0.008182	0.040172	0.0258945	0.034909
269.2	-0.000788	0.008799	0.040797	0.0261245	0.0347795
269.4	-0.0007215	0.008757	0.040096	0.025914	0.034986
269.6	-0.000918	0.0096365	0.040465	0.0265085	0.0351545
269.8	-0.0009685	0.0092755	0.0402875	0.025544	0.035623
	0.0523825
