# Supplementary material for: HetL, HetR and PatS form a reaction-diffusion system to control pattern formation in the cyanobacterium nostoc PCC 7120
Source: eLife journal article supplement (doi:10.7554/elife.59190), 2020-08-07
Supplement: supp [file elife-59190-supp-v1.zip › elife_poa_e59190_Figure_2_source_data_2.xlsx]

## Sheet: Feuil1
Fig 2A. Bacterial two hybrid assay between HetL and HetR. β-galactosidase activities were measured as described in section “Materials and Methods” and were expressed in Miller units. Strains producing the T18 and T25 served as negative control (control -). Strains producing T18-Zip and T25-Zip served as positive control (control +).
Raw data for Figure 2A
Three independent assays	OD600	OD420 at T1	OD420 at T2	Miller units			β-galactosidase activities Figure 2A
Time (s)		0	240				Samples	Average Miller units	STDEV
Temperature (˚C)		28.6	28.4				HetR-HetRR223W	593.086	15.9772
HetR-HetRR223W	0.5072	0.3148	1.3719	574.719			HetLD151A-HetL	335.84	82.1731
HetR-HetRR223W	0.5124	0.3229	1.4404	600.763			HetL-HetRR223W	33.4457	9.09228
HetR-HetRR223W	0.5189	0.3207	1.4595	603.775			HetLD151A-HetR	13.9891	4.42213
HetLD151A-HetL	0.5197	0.2464	0.8977	344.725			HetL-HetR	680.489	20.3714
HetLD151A-HetL	0.5093	0.2714	1.0349	413.209			Control +	958.205	48.516
HetLD151A-HetL	0.5492	0.2097	0.7107	249.585			Control -	13.4028	1.23133
HetL-HetRR223W	0.4848	0.1612	0.2153	30.919
HetL-HetRR223W	0.4395	0.1501	0.1907	25.8841
HetL-HetRR223W	0.4884	0.1619	0.2387	43.5341
HetLD151A-HetR	0.4213	0.1015	0.1148	8.89196
HetLD151A-HetR	0.4134	0.1358	0.1604	16.8017
HetLD151A-HetR	0.4176	0.1018	0.1259	16.2735
HetL-HetR	0.4995	0.3703	1.6434	703.941
HetL-HetR	0.4805	0.3422	1.5036	670.348
HetL-HetR	0.5086	0.3606	1.5915	667.179
Control +	0.4693	0.5091	2.0916	937.648
Control +	0.4803	0.5058	2.1048	923.352
Control +	0.4856	0.5219	2.2987	1013.62
Control -	0.3058	0.1031	0.1157	12.1888
Control -	0.2965	0.107	0.1216	14.6508
Control -	0.326	0.1046	0.1195	13.3688
