# Supplementary material for: HetL, HetR and PatS form a reaction-diffusion system to control pattern formation in the cyanobacterium nostoc PCC 7120
Source: eLife journal article supplement (doi:10.7554/elife.59190), 2020-08-07
Supplement: supp [file elife-59190-supp-v1.zip › elife_poa_e59190_Figure_3_source_data_1.xlsx]

## Sheet: Figure 3 source data HetL ITC
Differential Power						Real Data
DP_X	DP_Y	Baseline_X	Baseline_Y	Fit_X	Fit_Y	NDH_X	NDH_Y
0.083333	-8.9e-05					0.399995	-2.30273
0.1	-0.000311					0.736802	-2.32823
0.116667	-0.000422					1.07677	-2.15128
0.133333	-0.000504					1.41989	-1.94331
0.15	-0.000696					1.76617	-2.14234
0.166667	-0.001007					2.11561	0.358064
0.183333	-0.001189					2.46821	-2.38765
0.2	-0.00123					2.82396	-1.98159
0.216667	-0.001331					3.18288	-1.98183
0.233333	-0.001502					3.54495	-2.06765
0.25	-0.001333					3.91018	-1.91631
0.266667	-0.001044					4.27857	-1.98844
0.283333	-0.000625					4.65011	-1.91278
0.3	-0.000383					5.02482	-1.88986
0.316667	-1.1e-05					5.40268	-1.86961
0.333333	0.000341					5.7837	-1.89728
0.35	0.000574					6.16788	-1.75517
0.366667	0.000746					6.55522	-1.81214
0.383333	0.000908
0.4	0.000777
0.416667	0.000567
0.433333	0.000436
0.45	0.000205
0.466667	-3.6e-05
0.483333	1.3e-05
0.5	0.000312
0.516667	0.000601
0.533333	0.00094
0.55	0.001169
0.566667	0.001179
0.583333	0.001168
0.6	0.000998
0.616667	0.000729
0.633333	0.000319
0.65	7e-05
0.666667	-0.000319
0.683333	-0.000278
0.7	-4.6e-05
0.716667	3.7e-05
0.733333	7.9e-05
0.75	0.000132
0.766667	0.000375
0.783333	0.000658
0.8	0.000822
0.816667	0.000747
0.833333	0.000451
0.85	0.000306
0.866667	0.000141
0.883333	-1.5e-05
0.9	0.000151
0.916667	0.000787
0.933333	0.000863
0.95	0.000459
0.966667	0.000234
0.983333	1e-05
1	-6.5e-05
1.01667	0.001801
1.03333	-0.001334
1.05	-0.025348
1.06667	-0.041013
1.08333	-0.049117
1.1	-0.051854
1.11667	-0.049371
1.13333	-0.042238
1.15	-0.031765
1.16667	-0.020642
1.18333	-0.016589
1.2	-0.014911
1.21667	-0.012592
1.23333	-0.011093
1.25	-0.011235
1.26667	-0.010786
1.28333	-0.010447
1.3	-0.009835
1.31667	-0.009293
1.33333	-0.008931
1.35	-0.008519
1.36667	-0.007987
1.38333	-0.007525
1.4	-0.007131
1.41667	-0.007037
1.43333	-0.006844
1.45	-0.00675
1.46667	-0.006736
1.48333	-0.006413
1.5	-0.00593
1.51667	-0.005737
1.53333	-0.005284
1.55	-0.00477
1.56667	-0.004407
1.58333	-0.004024
1.6	-0.003724
1.61667	-0.003353
1.63333	-0.002963
1.65	-0.002602
1.66667	-0.002272
1.68333	-0.001941
1.7	-0.001575
1.71667	-0.001339
1.73333	-0.001273
1.75	-0.001097
1.76667	-0.000932
1.78333	-0.000656
1.8	-0.000286
1.81667	8.4e-05
1.83333	0.000443
1.85	0.000632
1.86667	0.000681
1.88333	0.000721
1.9	0.000603
1.91667	0.000214
1.93333	0.000144
1.95	8.5e-05
1.96667	-9.4e-05
1.98333	-0.000273
2	-0.000441
2.01667	-0.000501
2.03333	-0.000631
2.05	-0.000701
2.06667	-0.00072
2.08333	-0.00071
2.1	-0.000901
2.11667	-0.001064
2.13333	-0.001176
2.15	-0.001519
2.16667	-0.001751
2.18333	-0.001914
2.2	-0.001897
2.21667	-0.001742
2.23333	-0.001457
2.25	-0.001203
2.26667	-0.001078
2.28333	-0.000963
2.3	-0.000676
2.31667	-0.000501
2.33333	-0.000426
2.35	-0.000261
2.36667	-0.000165
2.38333	-0.00047
2.4	-0.000369
2.41667	-9.8e-05
2.43333	6.2e-05
2.45	0.000173
2.46667	0.000374
2.48333	0.000604
2.5	0.000886
2.51667	0.000617
2.53333	0.000349
2.55	0.00044
2.56667	0.000182
2.58333	0.000153
2.6	9.9e-05
2.61667	-7.3e-05
2.63333	-0.000376
2.65	-0.000159
2.66667	0.000148
2.68333	4.5e-05
2.7	7.1e-05
2.71667	0.000679
2.73333	0.000896
2.75	0.000943
2.76667	0.000931
2.78333	0.000808
2.8	0.000717
2.81667	0.001048
2.83333	0.001109
2.85	0.001281
2.86667	0.000962
2.88333	0.000633
2.9	0.000438
2.91667	0.000465
2.93333	0.000522
2.95	0.000489
2.96667	0.000467
2.98333	0.000544
3	0.000575
3.01667	0.000628
3.03333	0.000452
3.05	0.000196
3.06667	2e-05
3.08333	-0.000146
3.1	-9e-05
3.11667	0.00017
3.13333	0.00047
3.15	0.00056
3.16667	0.00067
3.18333	0.000759
3.2	0.001011
3.21667	0.001096
3.23333	0.001071
3.25	0.001016
3.26667	0.001001
3.28333	0.001255
3.3	0.00131
3.31667	0.001187
3.33333	0.001214
3.35	0.001231
3.36667	0.001139
3.38333	0.001306
3.4	0.001109
3.41667	0.000943
3.43333	0.001027
3.45	0.000982
3.46667	0.001176
3.48333	7.1e-05
3.5	0.000955
3.51667	0.003939
3.53333	0.002734
3.55	-0.041102
3.56667	-0.125697
3.58333	-0.244103
3.6	-0.372985
3.61667	-0.451418
3.63333	-0.471801
3.65	-0.432845
3.66667	-0.366378
3.68333	-0.283412
3.7	-0.202987
3.71667	-0.138487
3.73333	-0.090176
3.75	-0.060755
3.76667	-0.039014
3.78333	-0.023943
3.8	-0.018031
3.81667	-0.017694
3.83333	-0.019967
3.85	-0.02139
3.86667	-0.022083
3.88333	-0.022286
3.9	-0.021903
3.91667	-0.020948
3.93333	-0.019862
3.95	-0.018837
3.96667	-0.017832
3.98333	-0.016656
4	-0.015711
4.01667	-0.014576
4.03333	-0.01305
4.05	-0.011204
4.06667	-0.009378
4.08333	-0.008203
4.1	-0.007343
4.11667	-0.006655
4.13333	-0.006027
4.15	-0.005069
4.16667	-0.00408
4.18333	-0.003222
4.2	-0.002596
4.21667	-0.002103
4.23333	-0.00152
4.25	-0.001178
4.26667	-0.001025
4.28333	-0.000933
4.3	-0.000857
4.31667	-0.000667
4.33333	-0.000648
4.35	-0.000739
4.36667	-0.000619
4.38333	-0.00055
4.4	-0.000382
4.41667	-0.000302
4.43333	-0.000283
4.45	-0.000233
4.46667	-0.000154
4.48333	-0.000344
4.5	-0.00068
4.51667	-0.000856
4.53333	-0.000932
4.55	-0.001238
4.56667	-0.001644
4.58333	-0.00203
4.6	-0.002313
4.61667	-0.002499
4.63333	-0.002925
4.65	-0.00336
4.66667	-0.003896
4.68333	-0.004291
4.7	-0.004734
4.71667	-0.005569
4.73333	-0.006324
4.75	-0.007249
4.76667	-0.008084
4.78333	-0.008769
4.8	-0.009502
4.81667	-0.009986
4.83333	-0.01048
4.85	-0.010973
4.86667	-0.011437
4.88333	-0.01183
4.9	-0.012352
4.91667	-0.012605
4.93333	-0.013088
4.95	-0.013772
4.96667	-0.014315
4.98333	-0.014798
5	-0.015461
5.01667	-0.015889
5.03333	-0.015737
5.05	-0.015725
5.06667	-0.015543
5.08333	-0.015882
5.1	-0.01668
5.11667	-0.018107
5.13333	-0.019744
5.15	-0.016981
5.16667	0.005082
5.18333	0.035345
5.2	0.061022
5.21667	0.075605
5.23333	0.077049
5.25	0.073632
5.26667	0.057585
5.28333	0.046089
5.3	0.044174
5.31667	0.034372
5.33333	0.0247
5.35	0.019238
5.36667	0.011175
5.38333	0.008083
5.4	0.006099
5.41667	0.004003
5.43333	0.001666
5.45	-0.00039
5.46667	-0.001496
5.48333	-0.002313
5.5	-0.003802
5.51667	-0.004688
5.53333	-0.005604
5.55	-0.006319
5.56667	-0.007225
5.58333	-0.008351
5.6	-0.008947
5.61667	-0.009583
5.63333	-0.009579
5.65	-0.009585
5.66667	-0.009611
5.68333	-0.009567
5.7	-0.009499
5.71667	-0.00939
5.73333	-0.00931
5.75	-0.00938
5.76667	-0.009421
5.78333	-0.009331
5.8	-0.00917
5.81667	-0.008869
5.83333	-0.008478
5.85	-0.008077
5.86667	-0.007706
5.88333	-0.007304
5.9	-0.007301
5.91667	-0.006974
5.93333	-0.006607
5.95	-0.00602
5.96667	-0.005452
5.98333	-0.005365
6	-0.005136
6.01667	-0.006813
6.03333	-0.00483
6.05	-0.033748
6.06667	-0.103915
6.08333	-0.211762
6.1	-0.339385
6.11667	-0.431174
6.13333	-0.464032
6.15	-0.431181
6.16667	-0.360879
6.18333	-0.277288
6.2	-0.207779
6.21667	-0.143695
6.23333	-0.098482
6.25	-0.066878
6.26667	-0.044084
6.28333	-0.03599
6.3	-0.032126
6.31667	-0.030466
6.33333	-0.029276
6.35	-0.028826
6.36667	-0.028826
6.38333	-0.028856
6.4	-0.027725
6.41667	-0.026385
6.43333	-0.025266
6.45	-0.024646
6.46667	-0.024047
6.48333	-0.023597
6.5	-0.022104
6.51667	-0.019251
6.53333	-0.016128
6.55	-0.013935
6.56667	-0.011453
6.58333	-0.00877
6.6	-0.006521
6.61667	-0.005601
6.63333	-0.004762
6.65	-0.004052
6.66667	-0.003723
6.68333	-0.003153
6.7	-0.002255
6.71667	-0.001235
6.73333	-0.000385
6.75	0.000355
6.76667	0.000626
6.78333	0.000866
6.8	0.000838
6.81667	0.000794
6.83333	0.00098
6.85	0.001076
6.86667	0.001222
6.88333	0.001329
6.9	0.001239
6.91667	0.001166
6.93333	0.001182
6.95	0.001159
6.96667	0.001415
6.98333	0.001532
7	0.001554
7.01667	0.001612
7.03333	0.001521
7.05	0.00125
7.06667	0.000908
7.08333	0.000797
7.1	0.000801
7.11667	0.00073
7.13333	0.0007
7.15	0.00063
7.16667	0.00022
7.18333	-3e-05
7.2	-0.000147
7.21667	-9.9e-05
7.23333	-0.000301
7.25	-0.000652
7.26667	-0.000984
7.28333	-0.001106
7.3	-0.001356
7.31667	-0.001282
7.33333	-0.001269
7.35	-0.001435
7.36667	-0.001602
7.38333	-0.001668
7.4	-0.001693
7.41667	-0.002045
7.43333	-0.002166
7.45	-0.002278
7.46667	-0.00217
7.48333	-0.001691
7.5	-0.00137
7.51667	-0.001364
7.53333	-0.001318
7.55	-0.001132
7.56667	-0.000896
7.58333	-0.0005
7.6	-0.000268
7.61667	-0.000258
7.63333	-0.000198
7.65	-0.000179
7.66667	-8.9e-05
7.68333	8.1e-05
7.7	0.000381
7.71667	0.000512
7.73333	0.000543
7.75	0.000414
7.76667	0.000585
7.78333	0.000616
7.8	0.000501
7.81667	0.000351
7.83333	0.00036
7.85	0.00035
7.86667	0.000349
7.88333	0.000279
7.9	8.6e-05
7.91667	6e-05
7.93333	0.000174
7.95	0.000118
7.96667	0.000173
7.98333	0.000237
8	0.000192
8.01667	0.000206
8.03333	0.000101
8.05	0.000246
8.06667	0.000461
8.08333	0.000726
8.1	0.000884
8.11667	0.001064
8.13333	0.001215
8.15	0.001175
8.16667	0.001206
8.18333	0.001477
8.2	0.001382
8.21667	0.001472
8.23333	0.001512
8.25	0.001413
8.26667	0.001403
8.28333	0.001373
8.3	0.001208
8.31667	0.001039
8.33333	0.001019
8.35	0.00103
8.36667	0.001061
8.38333	0.000901
8.4	0.000506
8.41667	0.000456
8.43333	0.000115
8.45	-6.5e-05
8.46667	6.4e-05
8.48333	-2.6e-05
8.5	0.001606
8.51667	0.002781
8.53333	0.004017
8.55	-0.025768
8.56667	-0.095742
8.58333	-0.203466
8.6	-0.32701
8.61667	-0.416042
8.63333	-0.444943
8.65	-0.417435
8.66667	-0.346666
8.68333	-0.263098
8.7	-0.18464
8.71667	-0.124102
8.73333	-0.084764
8.75	-0.055885
8.76667	-0.038887
8.78333	-0.030839
8.8	-0.031183
8.81667	-0.031918
8.83333	-0.033553
8.85	-0.033948
8.86667	-0.032943
8.88333	-0.031688
8.9	-0.030017
8.91667	-0.027438
8.93333	-0.02646
8.95	-0.024911
8.96667	-0.021553
8.98333	-0.017524
9	-0.014171
9.01667	-0.011291
9.03333	-0.008782
9.05	-0.006543
9.06667	-0.005084
9.08333	-0.004025
9.1	-0.002152
9.11667	-0.000296
9.13333	0.000531
9.15	0.002028
9.16667	0.003154
9.18333	0.004061
9.2	0.005079
9.21667	0.006009
9.23333	0.006709
9.25	0.00757
9.26667	0.00815
9.28333	0.0086
9.3	0.008786
9.31667	0.008898
9.33333	0.008829
9.35	0.009041
9.36667	0.010292
9.38333	0.010694
9.4	0.011339
9.41667	0.011751
9.43333	0.011824
9.45	0.010647
9.46667	0.00952
9.48333	0.009383
9.5	-0.001741
9.51667	-0.019727
9.53333	-0.034342
9.55	-0.040988
9.56667	-0.038513
9.58333	-0.035328
9.6	-0.031554
9.61667	-0.024841
9.63333	-0.016538
9.65	-0.011995
9.66667	-0.008192
9.68333	-0.0065
9.7	-0.005549
9.71667	-0.004661
9.73333	-0.003372
9.75	-0.002294
9.76667	-0.001756
9.78333	-0.001157
9.8	9.4e-05
9.81667	0.000395
9.83333	0.000535
9.85	0.000995
9.86667	0.001396
9.88333	0.001666
9.9	0.002025
9.91667	0.002467
9.93333	0.002898
9.95	0.00348
9.96667	0.003721
9.98333	0.003743
10	0.003656
10.0167	0.003543
10.0333	0.003491
10.05	0.003288
10.0667	0.003215
10.0833	0.003552
10.1	0.003952
10.1167	0.004282
10.1333	0.004503
10.15	0.004703
10.1667	0.004554
10.1833	0.004414
10.2	0.004294
10.2167	0.004207
10.2333	0.00383
10.25	0.003603
10.2667	0.003246
10.2833	0.003029
10.3	0.002855
10.3167	0.002552
10.3333	0.002308
10.35	0.002084
10.3667	0.00177
10.3833	0.001757
10.4	0.001707
10.4167	0.001391
10.4333	0.001015
10.45	0.000729
10.4667	0.000373
10.4833	-5.3e-05
10.5	-0.000435
10.5167	-0.000632
10.5333	-0.000939
10.55	-0.001296
10.5667	-0.001113
10.5833	-0.00104
10.6	-0.001023
10.6167	-0.00077
10.6333	-0.000486
10.65	-3.3e-05
10.6667	9.1e-05
10.6833	0.000124
10.7	0.000272
10.7167	0.000489
10.7333	0.000686
10.75	0.001333
10.7667	0.00187
10.7833	0.002286
10.8	0.002929
10.8167	0.003621
10.8333	0.003913
10.85	0.004216
10.8667	0.004818
10.8833	0.00518
10.9	0.005386
10.9167	0.00551
10.9333	0.006384
10.95	0.007369
10.9667	0.007453
10.9833	0.006587
11	0.00678
11.0167	0.007593
11.0333	0.008217
11.05	-0.01404
11.0667	-0.080467
11.0833	-0.178114
11.1	-0.301117
11.1167	-0.401162
11.1333	-0.444236
11.15	-0.42146
11.1667	-0.353824
11.1833	-0.267439
11.2	-0.188335
11.2167	-0.122213
11.2333	-0.079021
11.25	-0.052809
11.2667	-0.033498
11.2833	-0.026756
11.3	-0.025531
11.3167	-0.02697
11.3333	-0.027248
11.35	-0.026937
11.3667	-0.026536
11.3833	-0.025444
11.4	-0.023595
11.4167	-0.022461
11.4333	-0.020477
11.45	-0.018442
11.4667	-0.015618
11.4833	-0.011753
11.5	-0.007926
11.5167	-0.004095
11.5333	4.6e-05
11.55	0.003637
11.5667	0.007837
11.5833	0.011488
11.6	0.013508
11.6167	0.014678
11.6333	0.016959
11.65	0.01935
11.6667	0.020531
11.6833	0.020702
11.7	0.020376
11.7167	0.018916
11.7333	0.015087
11.75	0.001898
11.7667	-0.008501
11.7833	-0.013951
11.8	-0.016856
11.8167	-0.017958
11.8333	-0.017651
11.85	-0.016943
11.8667	-0.016356
11.8833	-0.015519
11.9	-0.014621
11.9167	-0.013203
11.9333	-0.011215
11.95	-0.009577
11.9667	-0.008069
11.9833	-0.006831
12	-0.005519
12.0167	-0.004338
12.0333	-0.003168
12.05	-0.001867
12.0667	-0.000757
12.0833	0.000304
12.1	0.001206
12.1167	0.001705
12.1333	0.001903
12.15	0.002132
12.1667	0.002481
12.1833	0.002479
12.2	0.002546
12.2167	0.003019
12.2333	0.003261
12.25	0.003323
12.2667	0.003215
12.2833	0.003208
12.3	0.003283
12.3167	0.003149
12.3333	0.003135
12.35	0.002721
12.3667	0.002406
12.3833	0.002152
12.4	0.001905
12.4167	0.001828
12.4333	0.001491
12.45	0.001203
12.4667	0.001006
12.4833	0.000609
12.5	0.000531
12.5167	0.00083
12.5333	0.000819
12.55	0.000448
12.5667	2.8e-05
12.5833	-0.000273
12.6	-0.000533
12.6167	-0.00027
12.6333	0.000123
12.65	0.000626
12.6667	0.000909
12.6833	0.001112
12.7	0.001237
12.7167	0.001361
12.7333	0.001404
12.75	0.001698
12.7667	0.001811
12.7833	0.001565
12.8	0.001332
12.8167	0.001451
12.8333	0.00175
12.85	0.001799
12.8667	0.001618
12.8833	0.001407
12.9	0.00111
12.9167	0.000676
12.9333	0.000242
12.95	0.000147
12.9667	0.000193
12.9833	0.000349
13	0.000388
13.0167	0.000131
13.0333	-0.000357
13.05	-0.000605
13.0667	-0.000693
13.0833	-0.000531
13.1	-0.000395
13.1167	-0.000178
13.1333	-0.00011
13.15	0.000257
13.1667	0.000595
13.1833	0.000613
13.2	0.000673
13.2167	0.000666
13.2333	0.000788
13.25	0.000921
13.2667	0.000903
13.2833	0.000496
13.3	0.000271
13.3167	0.000447
13.3333	0.000373
13.35	0.000348
13.3667	0.000384
13.3833	0.00027
13.4	-0.000152
13.4167	-0.000655
13.4333	-0.000669
13.45	-0.000972
13.4667	-0.001865
13.4833	-0.001319
13.5	0.000389
13.5167	0.002374
13.5333	0.000619
13.55	-0.027276
13.5667	-0.087111
13.5833	-0.190646
13.6	-0.31351
13.6167	-0.402569
13.6333	-0.440927
13.65	-0.418116
13.6667	-0.348935
13.6833	-0.267964
13.7	-0.196472
13.7167	-0.135637
13.7333	-0.089692
13.75	-0.057336
13.7667	-0.040371
13.7833	-0.031316
13.8	-0.02779
13.8167	-0.027673
13.8333	-0.028066
13.85	-0.028499
13.8667	-0.028112
13.8833	-0.027325
13.9	-0.025617
13.9167	-0.02344
13.9333	-0.022433
13.95	-0.021696
13.9667	-0.020379
13.9833	-0.018262
14	-0.015206
14.0167	-0.012601
14.0333	-0.010237
14.05	-0.008562
14.0667	-0.007357
14.0833	-0.006493
14.1	-0.005898
14.1167	-0.005308
14.1333	-0.004378
14.15	-0.003288
14.1667	-0.002258
14.1833	-0.001577
14.2	-0.001128
14.2167	-0.001044
14.2333	-0.00093
14.25	-0.000866
14.2667	-0.000802
14.2833	-0.000798
14.3	-0.000975
14.3167	-0.000628
14.3333	-0.000711
14.35	-0.000624
14.3667	-0.000366
14.3833	-0.000149
14.4	-0.000283
14.4167	-0.000291
14.4333	1.1e-05
14.45	0.000202
14.4667	0.000304
14.4833	0.000185
14.5	3.7e-05
14.5167	1.4e-05
14.5333	0.000132
14.55	0.00036
14.5667	0.000398
14.5833	0.000465
14.6	0.000433
14.6167	0.000338
14.6333	2.3e-05
14.65	-0.000162
14.6667	-0.000186
14.6833	-0.000161
14.7	4e-06
14.7167	0.000107
14.7333	0.000151
14.75	0.000305
14.7667	0.000358
14.7833	0.000362
14.8	0.000405
14.8167	0.000678
14.8333	0.000831
14.85	0.000934
14.8667	0.000996
14.8833	0.001149
14.9	0.001362
14.9167	0.001383
14.9333	0.001225
14.95	0.001256
14.9667	0.001427
14.9833	0.001559
15	0.00159
15.0167	0.001417
15.0333	0.001214
15.05	0.001271
15.0667	0.001358
15.0833	0.000955
15.1	0.000822
15.1167	0.000369
15.1333	5.6e-05
15.15	-0.000317
15.1667	-0.00069
15.1833	-0.001043
15.2	-0.001557
15.2167	-0.002067
15.2333	-0.002637
15.25	-0.002907
15.2667	-0.003167
15.2833	-0.003556
15.3	-0.003907
15.3167	-0.004337
15.3333	-0.004547
15.35	-0.005088
15.3667	-0.005438
15.3833	-0.005828
15.4	-0.005969
15.4167	-0.006084
15.4333	-0.00608
15.45	-0.006015
15.4667	-0.005911
15.4833	-0.005566
15.5	-0.004622
15.5167	-0.003666
15.5333	-0.003101
15.55	-0.002195
15.5667	-0.00146
15.5833	-0.000784
15.6	1.2e-05
15.6167	0.000934
15.6333	0.002145
15.65	0.002687
15.6667	0.002929
15.6833	0.003521
15.7	0.003754
15.7167	0.004267
15.7333	0.00441
15.75	0.004463
15.7667	0.004606
15.7833	0.004799
15.8	0.004854
15.8167	0.004717
15.8333	0.004589
15.85	0.004942
15.8667	0.005124
15.8833	0.005216
15.9	0.005201
15.9167	0.00569
15.9333	0.00636
15.95	0.00762
15.9667	0.0086
15.9833	0.008789
16	0.00834
16.0167	0.004765
16.0333	0.006391
16.05	-0.020884
16.0667	-0.079379
16.0833	-0.175624
16.1	-0.295658
16.1167	-0.399132
16.1333	-0.443747
16.15	-0.425251
16.1667	-0.362016
16.1833	-0.28236
16.2	-0.204244
16.2167	-0.139374
16.2333	-0.089603
16.25	-0.063822
16.2667	-0.047082
16.2833	-0.038971
16.3	-0.03529
16.3167	-0.03584
16.3333	-0.038629
16.35	-0.039878
16.3667	-0.040158
16.3833	-0.041547
16.4	-0.040437
16.4167	-0.037792
16.4333	-0.034566
16.45	-0.031211
16.4667	-0.027676
16.4833	-0.02358
16.5	-0.019465
16.5167	-0.015891
16.5333	-0.013196
16.55	-0.010161
16.5667	-0.006896
16.5833	-0.004942
16.6	-0.003267
16.6167	-0.001479
16.6333	0.000751
16.65	0.0022
16.6667	0.003919
16.6833	0.005298
16.7	0.006837
16.7167	0.008094
16.7333	0.009223
16.75	0.009911
16.7667	0.010589
16.7833	0.011277
16.8	0.012086
16.8167	0.012767
16.8333	0.013509
16.85	0.014371
16.8667	0.015223
16.8833	0.015895
16.9	0.016647
16.9167	0.017167
16.9333	0.017818
16.95	0.018599
16.9667	0.01944
16.9833	0.01997
17	0.020571
17.0167	0.021204
17.0333	0.021789
17.05	0.022503
17.0667	0.023247
17.0833	0.024242
17.1	0.025176
17.1167	0.026167
17.1333	0.02714
17.15	0.027883
17.1667	0.028455
17.1833	0.028798
17.2	0.02929
17.2167	0.029805
17.2333	0.030331
17.25	0.031006
17.2667	0.031662
17.2833	0.032277
17.3	0.033093
17.3167	0.033706
17.3333	0.03431
17.35	0.035043
17.3667	0.035826
17.3833	0.03658
17.4	0.037403
17.4167	0.037999
17.4333	0.038345
17.45	0.038731
17.4667	0.039178
17.4833	0.039814
17.5	0.04076
17.5167	0.041644
17.5333	0.042497
17.55	0.043231
17.5667	0.043954
17.5833	0.044648
17.6	0.045391
17.6167	0.046068
17.6333	0.046663
17.65	0.047409
17.6667	0.047985
17.6833	0.048411
17.7	0.048746
17.7167	0.04912
17.7333	0.049673
17.75	0.050576
17.7667	0.051419
17.7833	0.051961
17.8	0.052444
17.8167	0.052941
17.8333	0.053405
17.85	0.05412
17.8667	0.055144
17.8833	0.055979
17.9	0.056723
17.9167	0.057347
17.9333	0.057798
17.95	0.058089
17.9667	0.058621
17.9833	0.059382
18	0.060073
18.0167	0.060929
18.0333	0.061671
18.05	0.062274
18.0667	0.062936
18.0833	0.063539
18.1	0.063961
18.1167	0.064424
18.1333	0.064823
18.15	0.064892
18.1667	0.06522
18.1833	0.065759
18.2	0.066208
18.2167	0.066842
18.2333	0.067292
18.25	0.067622
18.2667	0.067972
18.2833	0.068021
18.3	0.068091
18.3167	0.068842
18.3333	0.069517
18.35	0.070123
18.3667	0.069398
18.3833	0.070713
18.4	0.063768
18.4167	0.028725
18.4333	-0.070629
18.45	-0.194182
18.4667	-0.281725
18.4833	-0.313028
18.5	-0.304251
18.5167	-0.273266
18.5333	-0.228265
18.55	-0.201863
18.5667	-0.223352
18.5833	-0.28789
18.6	-0.382079
18.6167	-0.460604
18.6333	-0.490903
18.65	-0.464312
18.6667	-0.407441
18.6833	-0.32925
18.7	-0.251779
18.7167	-0.180469
18.7333	-0.118052
18.75	-0.072585
18.7667	-0.041149
18.7833	-0.017012
18.8	-0.010575
18.8167	-0.006804
18.8333	-0.003575
18.85	-0.006486
18.8667	-0.005388
18.8833	-0.006319
18.9	-0.00408
18.9167	0.000719
18.9333	0.000656
18.95	0.000942
18.9667	0.000279
18.9833	0.002216
19	0.003083
19.0167	0.005685
19.0333	0.011367
19.05	0.012688
19.0667	0.012859
19.0833	0.00795
19.1	0.006741
19.1167	0.008303
19.1333	0.012195
19.15	0.012617
19.1667	0.016518
19.1833	0.0183
19.2	0.017592
19.2167	0.01923
19.2333	0.022648
19.25	0.021496
19.2667	0.020395
19.2833	0.021143
19.3	0.021311
19.3167	0.020382
19.3333	0.023673
19.35	0.027694
19.3667	0.026255
19.3833	0.028787
19.4	0.028948
19.4167	0.024856
19.4333	0.024976
19.45	0.025857
19.4667	0.024167
19.4833	0.020167
19.5	0.022538
19.5167	0.02131
19.5333	0.020046
19.55	0.019631
19.5667	0.020317
19.5833	0.016523
19.6	0.011638
19.6167	0.009381
19.6333	0.008438
19.65	0.018235
19.6667	0.022852
19.6833	0.030109
19.7	0.035816
19.7167	0.032666
19.7333	0.029481
19.75	0.020475
19.7667	0.01559
19.7833	0.017815
19.8	0.017809
19.8167	0.019062
19.8333	0.02361
19.85	0.022649
19.8667	0.019097
19.8833	0.014146
19.9	0.013204
19.9167	0.014965
19.9333	0.018124
19.95	0.015262
19.9667	0.017191
19.9833	0.0176
20	0.014508
20.0167	0.016294
20.0333	0.007019
20.05	0.007223
20.0667	0.012568
20.0833	0.015393
20.1	0.012328
20.1167	0.007205
20.1333	0.009272
20.15	0.013789
20.1667	0.009566
20.1833	0.011154
20.2	0.015861
20.2167	0.015995
20.2333	0.015711
20.25	0.018746
20.2667	0.019312
20.2833	0.014758
20.3	0.011234
20.3167	0.007101
20.3333	0.010102
20.35	0.011252
20.3667	0.007183
20.3833	0.009184
20.4	0.012145
20.4167	0.010711
20.4333	0.010052
20.45	0.008854
20.4667	0.007886
20.4833	0.002608
20.5	0.003359
20.5167	0.005671
20.5333	0.00467
20.55	0.010189
20.5667	0.013098
20.5833	0.009517
20.6	0.009746
20.6167	0.009039
20.6333	0.004511
20.65	0.009093
20.6667	0.006746
20.6833	0.004448
20.7	0.00562
20.7167	0.008681
20.7333	0.009713
20.75	0.007005
20.7667	0.007987
20.7833	0.007059
20.8	0.008481
20.8167	0.006455
20.8333	0.004923
20.85	0.006041
20.8667	0.007628
20.8833	0.007446
20.9	0.005884
20.9167	0.005127
20.9333	0.002015
20.95	0.005433
20.9667	0.007112
20.9833	0.00423
21	0.007588
21.0167	0.00997
21.0333	0.010907
21.05	-0.006197
21.0667	-0.05995
21.0833	-0.146103
21.1	-0.256647
21.1167	-0.35501
21.1333	-0.40534
21.15	-0.411351
21.1667	-0.369081
21.1833	-0.303231
21.2	-0.231311
21.2167	-0.163326
21.2333	-0.110608
21.25	-0.070761
21.2667	-0.039854
21.2833	-0.024596
21.3	-0.021369
21.3167	-0.01868
21.3333	-0.01868
21.35	-0.018361
21.3667	-0.018282
21.3833	-0.018862
21.4	-0.018513
21.4167	-0.018096
21.4333	-0.01778
21.45	-0.017304
21.4667	-0.016398
21.4833	-0.014952
21.5	-0.012496
21.5167	-0.010286
21.5333	-0.008309
21.55	-0.006732
21.5667	-0.005065
21.5833	-0.003738
21.6	-0.002251
21.6167	-0.000704
21.6333	0.000669
21.65	0.001971
21.6667	0.001983
21.6833	0.002236
21.7	0.002128
21.7167	0.001797
21.7333	0.00131
21.75	0.001022
21.7667	0.000294
21.7833	8.7e-05
21.8	-0.000191
21.8167	-0.000535
21.8333	-0.000818
21.85	-0.000731
21.8667	-0.000435
21.8833	-0.000478
21.9	-0.000291
21.9167	-0.000254
21.9333	-8.7e-05
21.95	9.9e-05
21.9667	3.6e-05
21.9833	-0.000598
22	2.9e-05
22.0167	0.000482
22.0333	0.001364
22.05	0.002356
22.0667	0.003118
22.0833	0.00348
22.1	0.002892
22.1167	0.002727
22.1333	0.001488
22.15	-0.001061
22.1667	-0.00274
22.1833	-0.005968
22.2	-0.005497
22.2167	-0.006648
22.2333	-0.005605
22.25	-0.004642
22.2667	-0.00099
22.2833	0.001073
22.3	0.000706
22.3167	0.003516
22.3333	0.003098
22.35	0.000951
22.3667	-0.002766
22.3833	0.002666
22.4	0.002909
22.4167	-0.001282
22.4333	-0.00026
22.45	-0.001279
22.4667	-0.000588
22.4833	0.002514
22.5	-0.001315
22.5167	-0.000598
22.5333	0.00147
22.55	-0.002912
22.5667	-0.006034
22.5833	-0.003316
22.6	-0.001678
22.6167	-0.000875
22.6333	-0.002221
22.65	-0.004566
22.6667	-0.007322
22.6833	-0.000578
22.7	-0.000344
22.7167	-0.002011
22.7333	-0.004305
22.75	-0.00604
22.7667	-0.002444
22.7833	0.001282
22.8	0.002057
22.8167	0.000658
22.8333	0.000336
22.85	0.000994
22.8667	0.001292
22.8833	0.000729
22.9	0.004947
22.9167	0.002297
22.9333	0.001988
22.95	0.002829
22.9667	0.003019
22.9833	0.0005
23	0.003901
23.0167	0.003178
23.0333	0.002398
23.05	0.001168
23.0667	0.001889
23.0833	0.002159
23.1	0.00275
23.1167	0.004636
23.1333	0.003848
23.15	1.9e-05
23.1667	0.00239
23.1833	0.003381
23.2	-0.001797
23.2167	-0.000902
23.2333	-0.002863
23.25	-0.000815
23.2667	0.001614
23.2833	0.000222
23.3	-0.000589
23.3167	-0.000329
23.3333	-0.002758
23.35	-0.006036
23.3667	-0.004155
23.3833	-0.001563
23.4	0.000848
23.4167	0.00197
23.4333	-0.000227
23.45	0.001315
23.4667	0.000448
23.4833	-0.00293
23.5	0.000413
23.5167	0.000726
23.5333	-0.001031
23.55	-0.008937
23.5667	-0.054304
23.5833	-0.132211
23.6	-0.235987
23.6167	-0.337433
23.6333	-0.39731
23.65	-0.406376
23.6667	-0.372942
23.6833	-0.315798
23.7	-0.245215
23.7167	-0.179301
23.7333	-0.124688
23.75	-0.081354
23.7667	-0.0478
23.7833	-0.025297
23.8	-0.016193
23.8167	-0.01174
23.8333	-0.012168
23.85	-0.013275
23.8667	-0.013772
23.8833	-0.0139
23.9	-0.012837
23.9167	-0.011195
23.9333	-0.010924
23.95	-0.010752
23.9667	-0.009781
23.9833	-0.00839
24	-0.008278
24.0167	-0.007338
24.0333	-0.006169
24.05	-0.004809
24.0667	-0.0042
24.0833	-0.003641
24.1	-0.003181
24.1167	-0.003063
24.1333	-0.002977
24.15	-0.00244
24.1667	-0.002323
24.1833	-0.002566
24.2	-0.002539
24.2167	-0.002164
24.2333	-0.001511
24.25	-0.001007
24.2667	-0.000813
24.2833	-0.000729
24.3	-0.000716
24.3167	-0.000754
24.3333	-0.000754
24.35	-0.000614
24.3667	-0.000603
24.3833	-0.000673
24.4	-0.000733
24.4167	-0.000634
24.4333	-0.000787
24.45	-0.000759
24.4667	-0.000502
24.4833	-0.000245
24.5	-2.7e-05
24.5167	0.00024
24.5333	0.000256
24.55	0.000203
24.5667	9e-06
24.5833	-0.000184
24.6	-0.000338
24.6167	-0.000351
24.6333	-0.000132
24.65	-0.000124
24.6667	-4.6e-05
24.6833	9.2e-05
24.7	0.00022
24.7167	0.000409
24.7333	0.000591
24.75	0.000743
24.7667	0.000865
24.7833	0.000907
24.8	0.000579
24.8167	0.000214
24.8333	6.2e-05
24.85	0.00011
24.8667	-5.3e-05
24.8833	-0.000245
24.9	-0.000257
24.9167	-0.000346
24.9333	-0.000602
24.95	-0.000877
24.9667	-0.000842
24.9833	-0.000748
25	-0.000753
25.0167	-0.000854
25.0333	-0.000871
25.05	-0.000757
25.0667	-0.000674
25.0833	-0.0007
25.1	-0.000467
25.1167	-0.000318
25.1333	-0.000202
25.15	-0.000146
25.1667	-0.000271
25.1833	-0.000375
25.2	-0.000329
25.2167	-0.000166
25.2333	-4.4e-05
25.25	0.000188
25.2667	0.000611
25.2833	0.000793
25.3	0.000806
25.3167	0.001057
25.3333	0.001391
25.35	0.001514
25.3667	0.001557
25.3833	0.001421
25.4	0.001394
25.4167	0.001498
25.4333	0.001595
25.45	0.001772
25.4667	0.002039
25.4833	0.002426
25.5	0.002712
25.5167	0.003049
25.5333	0.003228
25.55	0.003018
25.5667	0.002547
25.5833	0.001807
25.6	0.001076
25.6167	0.000952
25.6333	0.000518
25.65	5.4e-05
25.6667	-0.00046
25.6833	-0.001204
25.7	-0.002468
25.7167	-0.003219
25.7333	-0.002865
25.75	-0.00281
25.7667	-0.003026
25.7833	-0.002722
25.8	-0.002147
25.8167	-0.001441
25.8333	-0.001073
25.85	-0.001354
25.8667	-0.000836
25.8833	-0.000138
25.9	0.001171
25.9167	0.001881
25.9333	0.002432
25.95	0.003374
25.9667	0.003736
25.9833	0.004377
26	0.004379
26.0167	0.004261
26.0333	0.003363
26.05	-0.003034
26.0667	-0.044582
26.0833	-0.11964
26.1	-0.224607
26.1167	-0.328026
26.1333	-0.389848
26.15	-0.404639
26.1667	-0.3715
26.1833	-0.310511
26.2	-0.239342
26.2167	-0.175966
26.2333	-0.118175
26.25	-0.075724
26.2667	-0.044373
26.2833	-0.021342
26.3	-0.009861
26.3167	-0.005385
26.3333	-0.000506
26.35	0.005203
26.3667	0.010922
26.3833	0.018271
26.4	0.00633
26.4167	-0.018227
26.4333	-0.037094
26.45	-0.046861
26.4667	-0.046208
26.4833	-0.041465
26.5	-0.037003
26.5167	-0.032617
26.5333	-0.028275
26.55	-0.025093
26.5667	-0.022081
26.5833	-0.020048
26.6	-0.018476
26.6167	-0.016933
26.6333	-0.015885
26.65	-0.014048
26.6667	-0.01236
26.6833	-0.011113
26.7	-0.010005
26.7167	-0.008718
26.7333	-0.007729
26.75	-0.006931
26.7667	-0.006302
26.7833	-0.005994
26.8	-0.005405
26.8167	-0.004648
26.8333	-0.003851
26.85	-0.003124
26.8667	-0.002887
26.8833	-0.00265
26.9	-0.002293
26.9167	-0.002056
26.9333	-0.001457
26.95	-0.001139
26.9667	-0.00077
26.9833	-0.000471
27	-0.000313
27.0167	-0.000131
27.0333	-4.3e-05
27.05	1.6e-05
27.0667	5.4e-05
27.0833	0.000283
27.1	0.000681
27.1167	0.001186
27.1333	0.001302
27.15	0.001259
27.1667	0.001256
27.1833	0.001283
27.2	0.00153
27.2167	0.001785
27.2333	0.001937
27.25	0.001949
27.2667	0.001661
27.2833	0.001374
27.3	0.001366
27.3167	0.001098
27.3333	0.000799
27.35	0.000521
27.3667	0.000462
27.3833	0.000284
27.4	9.5e-05
27.4167	-0.000133
27.4333	-0.000401
27.45	-0.000619
27.4667	-0.000667
27.4833	-0.000804
27.5	-0.001012
27.5167	-0.001039
27.5333	-0.001084
27.55	-0.001139
27.5667	-0.001124
27.5833	-0.00107
27.6	-0.000945
27.6167	-0.000868
27.6333	-0.000937
27.65	-0.000756
27.6667	-0.000576
27.6833	-0.000405
27.7	-0.000244
27.7167	-5e-05
27.7333	0.000123
27.75	0.000205
27.7667	0.000227
27.7833	0.00029
27.8	0.000392
27.8167	0.000569
27.8333	0.000789
27.85	0.000958
27.8667	0.001098
27.8833	0.001267
27.9	0.001377
27.9167	0.001522
27.9333	0.001493
27.95	0.001414
27.9667	0.001555
27.9833	0.001596
28	0.001597
28.0167	0.001714
28.0333	0.001769
28.05	0.001723
28.0667	0.001797
28.0833	0.001911
28.1	0.001826
28.1167	0.001655
28.1333	0.001341
28.15	0.001077
28.1667	0.000732
28.1833	0.000458
28.2	0.000183
28.2167	-9.7e-05
28.2333	-0.000274
28.25	-0.000462
28.2667	-0.0004
28.2833	-0.000338
28.3	-0.000475
28.3167	-0.00065
28.3333	-0.000746
28.35	-0.000842
28.3667	-0.000908
28.3833	-0.001055
28.4	-0.001301
28.4167	-0.001175
28.4333	-0.000933
28.45	-0.000782
28.4667	-0.00059
28.4833	-0.000578
28.5	-0.000267
28.5167	0.000816
28.5333	0.001664
28.55	-0.001009
28.5667	-0.036561
28.5833	-0.107314
28.6	-0.203207
28.6167	-0.309878
28.6333	-0.376277
28.65	-0.393275
28.6667	-0.366914
28.6833	-0.315052
28.7	-0.252371
28.7167	-0.187739
28.7333	-0.129835
28.75	-0.083111
28.7667	-0.048927
28.7833	-0.024182
28.8	-0.013258
28.8167	-0.012484
28.8333	-0.013749
28.85	-0.015034
28.8667	-0.016079
28.8833	-0.015784
28.9	-0.014529
28.9167	-0.013304
28.9333	-0.01309
28.95	-0.013006
28.9667	-0.011691
28.9833	-0.010797
29	-0.010253
29.0167	-0.009909
29.0333	-0.008997
29.05	-0.007954
29.0667	-0.006832
29.0833	-0.00562
29.1	-0.004508
29.1167	-0.003427
29.1333	-0.002618
29.15	-0.00214
29.1667	-0.001652
29.1833	-0.001473
29.2	-0.001135
29.2167	-0.001128
29.2333	-0.000825
29.25	-0.000572
29.2667	-0.000179
29.2833	0.000114
29.3	0.000507
29.3167	0.000908
29.3333	0.001184
29.35	0.00125
29.3667	0.001255
29.3833	0.001161
29.4	0.001097
29.4167	0.00096
29.4333	0.000856
29.45	0.000911
29.4667	0.000927
29.4833	0.000862
29.5	0.000737
29.5167	0.0008
29.5333	0.00061
29.55	0.000349
29.5667	0.000259
29.5833	8.9e-05
29.6	-0.000272
29.6167	-0.000436
29.6333	-0.000548
29.65	-0.000871
29.6667	-0.001293
29.6833	-0.001206
29.7	-0.001408
29.7167	-0.001805
29.7333	-0.002055
29.75	-0.002216
29.7667	-0.002296
29.7833	-0.002476
29.8	-0.002577
29.8167	-0.002572
29.8333	-0.002662
29.85	-0.002513
29.8667	-0.002443
29.8833	-0.002323
29.9	-0.002334
29.9167	-0.002508
29.9333	-0.002605
29.95	-0.002523
29.9667	-0.00237
29.9833	-0.002038
30	-0.001685
30.0167	-0.001585
30.0333	-0.001432
30.05	-0.001038
30.0667	-0.000915
30.0833	-0.000741
30.1	-0.000728
30.1167	-0.000646
30.1333	-0.00054
30.15	-0.000414
30.1667	-0.000368
30.1833	-0.000193
30.2	0.000233
30.2167	0.00077
30.2333	0.00142
30.25	0.001971
30.2667	0.002162
30.2833	0.002312
30.3	0.002453
30.3167	0.002566
30.3333	0.002602
30.35	0.002748
30.3667	0.002825
30.3833	0.002841
30.4	0.002878
30.4167	0.002897
30.4333	0.002585
30.45	0.002383
30.4667	0.002191
30.4833	0.002089
30.5	0.002037
30.5167	0.001998
30.5333	0.001688
30.55	0.001368
30.5667	0.001008
30.5833	0.000568
30.6	0.000288
30.6167	0.000151
30.6333	-0.0002
30.65	-0.000442
30.6667	-0.000553
30.6833	-0.000814
30.7	-0.000935
30.7167	-0.001034
30.7333	-0.00107
30.75	-0.000866
30.7667	-0.000652
30.7833	-0.000538
30.8	-0.000424
30.8167	-0.000438
30.8333	-0.000341
30.85	-0.000254
30.8667	-0.000177
30.8833	-0.00022
30.9	3.7e-05
30.9167	0.000555
30.9333	0.000974
30.95	0.001443
30.9667	0.002092
30.9833	0.00223
31	0.001829
31.0167	0.001648
31.0333	-0.001463
31.05	-0.003065
31.0667	-0.028437
31.0833	-0.088589
31.1	-0.180091
31.1167	-0.288172
31.1333	-0.365517
31.15	-0.394063
31.1667	-0.377538
31.1833	-0.332553
31.2	-0.266848
31.2167	-0.200443
31.2333	-0.140764
31.25	-0.091386
31.2667	-0.055407
31.2833	-0.029898
31.3	-0.0167
31.3167	-0.014641
31.3333	-0.016762
31.35	-0.018312
31.3667	-0.019282
31.3833	-0.018653
31.4	-0.018303
31.4167	-0.017394
31.4333	-0.016656
31.45	-0.016078
31.4667	-0.01568
31.4833	-0.015473
31.5	-0.015085
31.5167	-0.014258
31.5333	-0.013424
31.55	-0.012631
31.5667	-0.011638
31.5833	-0.010515
31.6	-0.009562
31.6167	-0.00888
31.6333	-0.008064
31.65	-0.007159
31.6667	-0.006283
31.6833	-0.005698
31.7	-0.005022
31.7167	-0.004207
31.7333	-0.003592
31.75	-0.003057
31.7667	-0.002352
31.7833	-0.002137
31.8	-0.001782
31.8167	-0.001387
31.8333	-0.001284
31.85	-0.000972
31.8667	-0.000599
31.8833	-0.000377
31.9	-0.000284
31.9167	-0.000232
31.9333	-3.3e-05
31.95	7e-06
31.9667	-0.000144
31.9833	-0.000494
32	-0.000685
32.0167	-0.000906
32.0333	-0.000989
32.05	-0.000902
32.0667	-0.001025
32.0833	-0.001058
32.1	-0.00093
32.1167	-0.000794
32.1333	-0.000587
32.15	-0.00046
32.1667	-0.000454
32.1833	-0.000487
32.2	-0.00034
32.2167	-0.000244
32.2333	-0.000484
32.25	-0.000574
32.2667	-0.000684
32.2833	-0.000694
32.3	-0.000425
32.3167	-7.5e-05
32.3333	0.000183
32.35	0.00021
32.3667	1.8e-05
32.3833	-0.000325
32.4	-0.000427
32.4167	-0.00027
32.4333	-7e-05
32.45	0.000131
32.4667	0.000221
32.4833	0.000271
32.5	0.000372
32.5167	0.000392
32.5333	0.00071
32.55	0.001168
32.5667	0.001426
32.5833	0.001494
32.6	0.001313
32.6167	0.001411
32.6333	0.0014
32.65	0.00145
32.6667	0.00144
32.6833	0.00142
32.7	0.00174
32.7167	0.001979
32.7333	0.002171
32.75	0.001784
32.7667	0.001486
32.7833	0.000978
32.8	0.00067
32.8167	0.000483
32.8333	0.000375
32.85	5.7e-05
32.8667	-0.000111
32.8833	-0.000278
32.9	-0.000366
32.9167	-0.000504
32.9333	-0.000835
32.95	-0.001216
32.9667	-0.001278
32.9833	-0.001389
33	-0.00175
33.0167	-0.002121
33.0333	-0.002248
33.05	-0.002216
33.0667	-0.001963
33.0833	-0.00186
33.1	-0.001737
33.1167	-0.001724
33.1333	-0.001835
33.15	-0.001487
33.1667	-0.000688
33.1833	-0.0001
33.2	0.000439
33.2167	0.000877
33.2333	0.001445
33.25	0.001734
33.2667	0.003092
33.2833	0.00394
33.3	0.003409
33.3167	0.001667
33.3333	0.001167
33.35	0.001408
33.3667	0.000999
[truncated: 910 more rows]

## Sheet: Figure 3 source data HetR ITC
Differential Power										Fit One site 1:1
DP_X	DP_Y									Fit_X	Fit_Y
0.083333	0.000817									0.034682	-22.4203
0.1	0.001064									0.209088	-22.3896
0.116667	0.001271									0.385146	-22.3186
0.133333	0.001457									0.562855	-22.2033
0.15	0.001734									0.742215	-22.0024
0.166667	0.001821									0.923225	-21.6234
0.183333	0.001668									1.10589	-20.8715
0.2	0.001454									1.2902	-19.5188
0.216667	0.001019									1.47616	-17.8507
0.233333	0.000645									1.66378	-16.6229
0.25	0.00042									1.85304	-15.972
0.266667	0.000376									2.04396	-15.6471
0.283333	0.000211									2.23652	-15.4746
0.3	-9.7e-05									2.43074	-15.3753
0.316667	-0.000676									2.62661	-15.3138
0.333333	-0.001025									2.82413	-15.2734
0.35	-0.001014									3.0233	-15.2456
0.366667	-0.001083									3.22412	-15.2256
0.383333	-0.001051									3.42659	-15.2108
0.4	-0.001018
0.416667	-0.000924
0.433333	-0.0007
0.45	-0.000577
0.466667	-0.000523
0.483333	-0.000689
0.5	-0.000795
0.516667	-0.00087
0.533333	-0.000816
0.55	-0.000762
0.566667	-0.000767
0.583333	-0.000843
0.6	-0.000859
0.616667	-0.000854
0.633333	-0.00084
0.65	-0.000766
0.666667	-0.000782
0.683333	-0.000828
0.7	-0.000612
0.716667	-0.000608
0.733333	-0.000793
0.75	-0.000888
0.766667	-0.001113
0.783333	-0.001409
0.8	-0.001391
0.816667	-0.001214
0.833333	-0.001027
0.85	-0.00062
0.866667	-0.000312
0.883333	0.000175
0.9	0.000638
0.916667	0.001031
0.933333	0.001304
0.95	0.001397
0.966667	0.00167
0.983333	0.002923
1	0.002524
1.01667	0.005386
1.03333	-0.007242
1.05	-0.08093
1.06667	-0.150079
1.08333	-0.199767
1.1	-0.214324
1.11667	-0.199402
1.13333	-0.16948
1.15	-0.133148
1.16667	-0.102305
1.18333	-0.076273
1.2	-0.054019
1.21667	-0.036024
1.23333	-0.02465
1.25	-0.021365
1.26667	-0.019191
1.28333	-0.016996
1.3	-0.015108
1.31667	-0.01397
1.33333	-0.012592
1.35	-0.011424
1.36667	-0.010406
1.38333	-0.009778
1.4	-0.008775
1.41667	-0.007991
1.43333	-0.007048
1.45	-0.006184
1.46667	-0.005321
1.48333	-0.004378
1.5	-0.003638
1.51667	-0.003138
1.53333	-0.002787
1.55	-0.002317
1.56667	-0.001727
1.58333	-0.001457
1.6	-0.001169
1.61667	-0.00079
1.63333	-0.000602
1.65	-0.000423
1.66667	-0.000374
1.68333	-0.000256
1.7	7.2e-05
1.71667	0.00024
1.73333	0.000409
1.75	0.000838
1.76667	0.001106
1.78333	0.001285
1.8	0.001413
1.81667	0.001393
1.83333	0.001333
1.85	0.001383
1.86667	0.001563
1.88333	0.001693
1.9	0.001742
1.91667	0.001904
1.93333	0.001985
1.95	0.002026
1.96667	0.002097
1.98333	0.002328
2	0.002626
2.01667	0.002666
2.03333	0.002395
2.05	0.002165
2.06667	0.001974
2.08333	0.001694
2.1	0.001485
2.11667	0.001137
2.13333	0.000888
2.15	0.00077
2.16667	0.000451
2.18333	0.000203
2.2	-0.000441
2.21667	-0.000946
2.23333	-0.001421
2.25	-0.001696
2.26667	-0.002081
2.28333	-0.002495
2.3	-0.003013
2.31667	-0.003763
2.33333	-0.004073
2.35	-0.004073
2.36667	-0.004072
2.38333	-0.004042
2.4	-0.004028
2.41667	-0.004307
2.43333	-0.004296
2.45	-0.004426
2.46667	-0.004105
2.48333	-0.003884
2.5	-0.003537
2.51667	-0.003414
2.53333	-0.00306
2.55	-0.002966
2.56667	-0.002693
2.58333	-0.002219
2.6	-0.001594
2.61667	-0.00102
2.63333	-0.000616
2.65	-0.000332
2.66667	-0.000307
2.68333	-0.000313
2.7	2e-06
2.71667	0.000187
2.73333	0.000422
2.75	0.000817
2.76667	0.001132
2.78333	0.001338
2.8	0.001383
2.81667	0.001551
2.83333	0.001148
2.85	0.001036
2.86667	0.000823
2.88333	0.000521
2.9	0.000286
2.91667	2.6e-05
2.93333	-0.000125
2.95	-0.000126
2.96667	-3.6e-05
2.98333	5.3e-05
3	9.8e-05
3.01667	-7.2e-05
3.03333	-0.000212
3.05	-0.000532
3.06667	-0.000682
3.08333	-0.000612
3.1	-0.000409
3.11667	-2.9e-05
3.13333	0.00031
3.15	0.00054
3.16667	0.00076
3.18333	0.00109
3.2	0.001329
3.21667	0.001668
3.23333	0.001846
3.25	0.001815
3.26667	0.001903
3.28333	0.002182
3.3	0.002825
3.31667	0.00354
3.33333	0.003985
3.35	0.004589
3.36667	0.005044
3.38333	0.005419
3.4	0.00609
3.41667	0.006624
3.43333	0.007318
3.45	0.008722
3.46667	0.010075
3.48333	0.010129
3.5	0.008856
3.51667	0.009584
3.53333	-0.017708
3.55	-0.195239
3.56667	-0.537871
3.58333	-1.00676
3.6	-1.49382
3.61667	-1.81822
3.63333	-1.90833
3.65	-1.80404
3.66667	-1.5744
3.68333	-1.29581
3.7	-1.01983
3.71667	-0.77649
3.73333	-0.577457
3.75	-0.420855
3.76667	-0.313403
3.78333	-0.24432
3.8	-0.202735
3.81667	-0.175623
3.83333	-0.156701
3.85	-0.137399
3.86667	-0.126857
3.88333	-0.114975
3.9	-0.106287
3.91667	-0.103584
3.93333	-0.09487
3.95	-0.086197
3.96667	-0.082184
3.98333	-0.075301
4	-0.071198
4.01667	-0.068702
4.03333	-0.063126
4.05	-0.059139
4.06667	-0.060183
4.08333	-0.057937
4.1	-0.057398
4.11667	-0.056307
4.13333	-0.056476
4.15	-0.054276
4.16667	-0.050755
4.18333	-0.045584
4.2	-0.041436
4.21667	-0.038379
4.23333	-0.034762
4.25	-0.031965
4.26667	-0.030268
4.28333	-0.027892
4.3	-0.025534
4.31667	-0.023389
4.33333	-0.021554
4.35	-0.019939
4.36667	-0.018444
4.38333	-0.016649
4.4	-0.0146
4.41667	-0.012865
4.43333	-0.011681
4.45	-0.010266
4.46667	-0.008642
4.48333	-0.007178
4.5	-0.005804
4.51667	-0.004428
4.53333	-0.003833
4.55	-0.003547
4.56667	-0.003242
4.58333	-0.003076
4.6	-0.002827
4.61667	-0.002628
4.63333	-0.002349
4.65	-0.00271
4.66667	-0.003331
4.68333	-0.003773
4.7	-0.004214
4.71667	-0.004857
4.73333	-0.00434
4.75	-0.004114
4.76667	-0.003557
4.78333	-0.00312
4.8	-0.003113
4.81667	-0.003188
4.83333	-0.002733
4.85	-0.002628
4.86667	-0.002304
4.88333	-0.001949
4.9	-0.001869
4.91667	-0.001561
4.93333	-0.000542
4.95	-0.000224
4.96667	0.000154
4.98333	0.000373
5	0.000632
5.01667	0.001292
5.03333	0.001912
5.05	0.002383
5.06667	0.002893
5.08333	0.003013
5.1	0.002629
5.11667	0.001938
5.13333	0.001388
5.15	0.000817
5.16667	0.000836
5.18333	0.000835
5.2	0.000343
5.21667	-0.000314
5.23333	-0.000851
5.25	-0.000869
5.26667	-0.001166
5.28333	-0.001303
5.3	-0.001309
5.31667	-0.00081
5.33333	-0.00032
5.35	-0.00037
5.36667	-0.000151
5.38333	0.000159
5.4	0.000743
5.41667	0.000904
5.43333	0.001086
5.45	0.001667
5.46667	0.001888
5.48333	0.002129
5.5	0.002178
5.51667	0.002275
5.53333	0.001902
5.55	0.001668
5.56667	0.001705
5.58333	0.001672
5.6	0.001767
5.61667	0.00146
5.63333	0.001304
5.65	0.001088
5.66667	0.001031
5.68333	0.001035
5.7	0.001266
5.71667	0.001175
5.73333	0.000934
5.75	0.000633
5.76667	0.000233
5.78333	-0.000458
5.8	-0.000914
5.81667	-0.001322
5.83333	-0.00182
5.85	-0.001788
5.86667	-0.001606
5.88333	-0.001265
5.9	-0.000839
5.91667	-0.000527
5.93333	2.6e-05
5.95	0.000738
5.96667	0.00112
5.98333	0.000613
6	0.001168
6.01667	0.00447
6.03333	-0.008148
6.05	-0.136877
6.06667	-0.440775
6.08333	-0.879073
6.1	-1.35992
6.11667	-1.72136
6.13333	-1.87079
6.15	-1.81115
6.16667	-1.61432
6.18333	-1.35579
6.2	-1.08886
6.21667	-0.842406
6.23333	-0.635447
6.25	-0.468559
6.26667	-0.342691
6.28333	-0.260933
6.3	-0.218383
6.31667	-0.192958
6.33333	-0.177653
6.35	-0.164808
6.36667	-0.149373
6.38333	-0.133988
6.4	-0.121362
6.41667	-0.110081
6.43333	-0.1021
6.45	-0.099249
6.46667	-0.094598
6.48333	-0.087947
6.5	-0.079905
6.51667	-0.070229
6.53333	-0.064863
6.55	-0.062457
6.56667	-0.06094
6.58333	-0.059324
6.6	-0.056758
6.61667	-0.053837
6.63333	-0.050847
6.65	-0.048317
6.66667	-0.044976
6.68333	-0.041306
6.7	-0.037956
6.71667	-0.034412
6.73333	-0.030958
6.75	-0.027115
6.76667	-0.023661
6.78333	-0.020297
6.8	-0.017934
6.81667	-0.015788
6.83333	-0.014221
6.85	-0.012945
6.86667	-0.011629
6.88333	-0.010383
6.9	-0.009077
6.91667	-0.00754
6.93333	-0.005962
6.95	-0.004824
6.96667	-0.003976
6.98333	-0.002929
7	-0.002462
7.01667	-0.002053
7.03333	-0.001655
7.05	-0.001276
7.06667	-0.000858
7.08333	-0.000349
7.1	0.000448
7.11667	0.000956
7.13333	0.001304
7.15	0.001323
7.16667	0.001241
7.18333	0.001119
7.2	0.001085
7.21667	0.001172
7.23333	0.000808
7.25	0.000455
7.26667	5.1e-05
7.28333	-0.000193
7.3	-0.00055
7.31667	-0.001059
7.33333	-0.001537
7.35	-0.002016
7.36667	-0.002414
7.38333	-0.003003
7.4	-0.004086
7.41667	-0.004732
7.43333	-0.004988
7.45	-0.005203
7.46667	-0.005569
7.48333	-0.005814
7.5	-0.005823
7.51667	-0.005652
7.53333	-0.005302
7.55	-0.005401
7.56667	-0.005331
7.58333	-0.00523
7.6	-0.004786
7.61667	-0.004438
7.63333	-0.004099
7.65	-0.003711
7.66667	-0.003023
7.68333	-0.002634
7.7	-0.002332
7.71667	-0.001757
7.73333	-0.000902
7.75	-6.7e-05
7.76667	0.000298
7.78333	0.000813
7.8	0.001434
7.81667	0.002078
7.83333	0.002863
7.85	0.003747
7.86667	0.004341
7.88333	0.005526
7.9	0.006946
7.91667	0.00816
7.93333	0.009055
7.95	0.009759
7.96667	0.010663
7.98333	0.011557
8	0.012212
8.01667	0.012177
8.03333	0.011521
8.05	0.011315
8.06667	0.01073
8.08333	0.010014
8.1	0.009186
8.11667	0.008274
8.13333	0.006963
8.15	0.005951
8.16667	0.00448
8.18333	0.002168
8.2	0.000124
8.21667	-0.001094
8.23333	-0.002301
8.25	-0.003108
8.26667	-0.004386
8.28333	-0.005963
8.3	-0.007125
8.31667	-0.0078
8.33333	-0.008116
8.35	-0.007812
8.36667	-0.007768
8.38333	-0.007923
8.4	-0.00809
8.41667	-0.008148
8.43333	-0.008396
8.45	-0.007734
8.46667	-0.007182
8.48333	-0.00777
8.5	-0.004951
8.51667	-0.000894
8.53333	-0.017498
8.55	-0.147372
8.56667	-0.446745
8.58333	-0.876219
8.6	-1.35156
8.61667	-1.70503
8.63333	-1.8422
8.65	-1.78339
8.66667	-1.59112
8.68333	-1.33786
8.7	-1.07725
8.71667	-0.843991
8.73333	-0.644664
8.75	-0.486668
8.76667	-0.365721
8.78333	-0.291314
8.8	-0.242229
8.81667	-0.212596
8.83333	-0.197413
8.85	-0.176459
8.86667	-0.160776
8.88333	-0.146793
8.9	-0.134812
8.91667	-0.127352
8.93333	-0.120362
8.95	-0.111793
8.96667	-0.104623
8.98333	-0.090723
9	-0.083045
9.01667	-0.073198
9.03333	-0.069051
9.05	-0.067434
9.06667	-0.065277
9.08333	-0.06284
9.1	-0.060244
9.11667	-0.057139
9.13333	-0.054444
9.15	-0.05168
9.16667	-0.048565
9.18333	-0.04603
9.2	-0.043226
9.21667	-0.040653
9.23333	-0.03841
9.25	-0.036296
9.26667	-0.033983
9.28333	-0.03142
9.3	-0.029267
9.31667	-0.027275
9.33333	-0.025463
9.35	-0.023441
9.36667	-0.021808
9.38333	-0.020066
9.4	-0.018584
9.41667	-0.016872
9.43333	-0.015181
9.45	-0.013349
9.46667	-0.011527
9.48333	-0.009835
9.5	-0.008264
9.51667	-0.006512
9.53333	-0.005
9.55	-0.003648
9.56667	-0.002536
9.58333	-0.001664
9.6	-0.001222
9.61667	-0.000309
9.63333	0.000463
9.65	0.001206
9.66667	0.001679
9.68333	0.001921
9.7	0.002354
9.71667	0.002718
9.73333	0.002862
9.75	0.002826
9.76667	0.00273
9.78333	0.002494
9.8	0.002298
9.81667	0.002153
9.83333	0.001938
9.85	0.001623
9.86667	0.001077
9.88333	0.000522
9.9	0.000406
9.91667	0.000379
9.93333	0.000382
9.95	8.5e-05
9.96667	-0.000142
9.98333	-0.000309
10	-0.000358
10.0167	-0.000562
10.0333	-0.000695
10.05	-0.000878
10.0667	-0.000891
10.0833	-0.000435
10.1	-0.000472
10.1167	-0.000645
10.1333	-0.000848
10.15	-0.000971
10.1667	-0.001104
10.1833	-0.001288
10.2	-0.000966
10.2167	-0.001271
10.2333	-0.001597
10.25	-0.001823
10.2667	-0.001909
10.2833	-0.002105
10.3	-0.002195
10.3167	-0.002154
10.3333	-0.001923
10.35	-0.001732
10.3667	-0.001591
10.3833	-0.00157
10.4	-0.001783
10.4167	-0.001854
10.4333	-0.001734
10.45	-0.001474
10.4667	-0.001254
10.4833	-0.001164
10.5	-0.000986
10.5167	-0.000642
10.5333	-0.000528
10.55	-0.000664
10.5667	-0.00064
10.5833	-0.000506
10.6	-0.000412
10.6167	-0.000258
10.6333	-0.000244
10.65	-5.9e-05
10.6667	-0.000215
10.6833	-0.000511
10.7	-0.000674
10.7167	-0.000302
10.7333	2.1e-05
10.75	0.000293
10.7667	0.000855
10.7833	0.001387
10.8	0.001994
10.8167	0.002532
10.8333	0.002829
10.85	0.003176
10.8667	0.003894
10.8833	0.004611
10.9	0.005515
10.9167	0.006461
10.9333	0.007858
10.95	0.008915
10.9667	0.010112
10.9833	0.009659
11	0.008771
11.0167	0.009436
11.0333	0.00353
11.05	-0.100466
11.0667	-0.368112
11.0833	-0.768018
11.1	-1.23302
11.1167	-1.60288
11.1333	-1.76694
11.15	-1.73316
11.1667	-1.55697
11.1833	-1.322
11.2	-1.07818
11.2167	-0.851541
11.2333	-0.658639
11.25	-0.499726
11.2667	-0.382764
11.2833	-0.302622
11.3	-0.24963
11.3167	-0.221917
11.3333	-0.198384
11.35	-0.181641
11.3667	-0.163628
11.3833	-0.147245
11.4	-0.132603
11.4167	-0.123945
11.4333	-0.114817
11.45	-0.112459
11.4667	-0.10666
11.4833	-0.100562
11.5	-0.095257
11.5167	-0.083769
11.5333	-0.078171
11.55	-0.075063
11.5667	-0.069825
11.5833	-0.068797
11.6	-0.067584
11.6167	-0.062271
11.6333	-0.057849
11.65	-0.053677
11.6667	-0.050055
11.6833	-0.046613
11.7	-0.043506
11.7167	-0.040765
11.7333	-0.037714
11.75	-0.034784
11.7667	-0.032133
11.7833	-0.029862
11.8	-0.027938
11.8167	-0.026124
11.8333	-0.02421
11.85	-0.022286
11.8667	-0.020332
11.8833	-0.018757
11.9	-0.017332
11.9167	-0.01629
11.9333	-0.015478
11.95	-0.014897
11.9667	-0.014185
11.9833	-0.013353
12	-0.012351
12.0167	-0.011457
12.0333	-0.010463
12.05	-0.009359
12.0667	-0.008395
12.0833	-0.007651
12.1	-0.006898
12.1167	-0.006217
12.1333	-0.005766
12.15	-0.005166
12.1667	-0.004715
12.1833	-0.004374
12.2	-0.003694
12.2167	-0.003188
12.2333	-0.002702
12.25	-0.002386
12.2667	-0.00202
12.2833	-0.001595
12.3	-0.001239
12.3167	-0.001034
12.3333	-0.00093
12.35	-0.001005
12.3667	-0.0008
12.3833	-0.000516
12.4	-0.00017
12.4167	-0.0001
12.4333	-3.1e-05
12.45	3.9e-05
12.4667	-3.2e-05
12.4833	-5.2e-05
12.5	1e-06
12.5167	2e-06
12.5333	-9.6e-05
12.55	-0.000135
12.5667	-1.4e-05
12.5833	-4.2e-05
12.6	-0.000166
12.6167	-0.000295
12.6333	-0.000385
12.65	-0.000365
12.6667	-0.000255
12.6833	-0.000164
12.7	-0.000427
12.7167	-0.00059
12.7333	-0.000884
12.75	-0.000607
12.7667	-0.000331
12.7833	0.000156
12.8	0.000571
12.8167	0.001002
12.8333	0.001422
12.85	0.001803
12.8667	0.001994
12.8833	0.001984
12.9	0.001875
12.9167	0.001937
12.9333	0.002199
12.95	0.00231
12.9667	0.002292
12.9833	0.002224
13	0.002026
13.0167	0.001733
13.0333	0.00154
13.05	0.001437
13.0667	0.001054
13.0833	0.00051
13.1	-0.000101
13.1167	-0.000468
13.1333	-0.000905
13.15	-0.001222
13.1667	-0.001419
13.1833	-0.001616
13.2	-0.001651
13.2167	-0.00173
13.2333	-0.0015
13.25	-0.001079
13.2667	-0.000768
13.2833	-0.000478
13.3	-0.000135
13.3167	0.000246
13.3333	0.000677
13.35	0.001138
13.3667	0.001449
13.3833	0.00206
13.4	0.002973
13.4167	0.003907
13.4333	0.004532
13.45	0.005476
13.4667	0.00598
13.4833	0.006414
13.5	0.00636
13.5167	0.005477
13.5333	0.005374
13.55	-0.067229
13.5667	-0.292132
13.5833	-0.659445
13.6	-1.11135
13.6167	-1.50696
13.6333	-1.71016
13.65	-1.71214
13.6667	-1.5624
13.6833	-1.34362
13.7	-1.10939
13.7167	-0.895434
13.7333	-0.711688
13.75	-0.560142
13.7667	-0.441056
13.7833	-0.357901
13.8	-0.306494
13.8167	-0.273932
13.8333	-0.24867
13.85	-0.228668
13.8667	-0.204416
13.8833	-0.185523
13.9	-0.175001
13.9167	-0.160155
13.9333	-0.145769
13.95	-0.134493
13.9667	-0.121497
13.9833	-0.110241
14	-0.105604
14.0167	-0.097466
14.0333	-0.095709
14.05	-0.094521
14.0667	-0.088453
14.0833	-0.087435
14.1	-0.084617
14.1167	-0.07887
14.1333	-0.075252
14.15	-0.070615
14.1667	-0.066658
14.1833	-0.06322
14.2	-0.060163
14.2167	-0.056878
14.2333	-0.054334
14.25	-0.052319
14.2667	-0.050354
14.2833	-0.048589
14.3	-0.046435
14.3167	-0.043995
14.3333	-0.041425
14.35	-0.039175
14.3667	-0.037185
14.3833	-0.035165
14.4	-0.032536
14.4167	-0.029783
14.4333	-0.02752
14.45	-0.025187
14.4667	-0.022504
14.4833	-0.020081
14.5	-0.018519
14.5167	-0.016895
14.5333	-0.015691
14.55	-0.014308
14.5667	-0.012894
14.5833	-0.0118
14.6	-0.010958
14.6167	-0.009725
14.6333	-0.009183
14.65	-0.008891
14.6667	-0.008228
14.6833	-0.007566
14.7	-0.007105
14.7167	-0.006796
14.7333	-0.006587
14.75	-0.006349
14.7667	-0.0061
14.7833	-0.006251
14.8	-0.006344
14.8167	-0.006509
14.8333	-0.006125
14.85	-0.00571
14.8667	-0.005186
14.8833	-0.004491
14.9	-0.003818
14.9167	-0.003161
14.9333	-0.002335
14.95	-0.001588
14.9667	-0.000812
14.9833	-0.000355
15	-9.8e-05
15.0167	0.000142
15.0333	0.000283
15.05	0.000903
15.0667	0.001564
15.0833	0.001964
15.1	0.002306
15.1167	0.002454
15.1333	0.002881
15.15	0.003388
15.1667	0.003576
15.1833	0.003073
15.2	0.002772
15.2167	0.002816
15.2333	0.002609
15.25	0.002123
15.2667	0.001896
15.2833	0.00178
15.3	0.001606
15.3167	0.001781
15.3333	0.002266
15.35	0.002391
15.3667	0.002416
15.3833	0.002322
15.4	0.002049
15.4167	0.001897
15.4333	0.001696
15.45	0.001815
15.4667	0.001894
15.4833	0.001782
15.5	0.001813
15.5167	0.001744
15.5333	0.001575
15.55	0.001546
15.5667	0.001636
15.5833	0.001737
15.6	0.00175
15.6167	0.001649
15.6333	0.001368
15.65	0.000797
15.6667	0.000426
15.6833	0.000385
15.7	0.000245
15.7167	0.000107
15.7333	0.000328
15.75	0.000509
15.7667	0.00049
15.7833	9.1e-05
15.8	-0.000437
15.8167	-0.000981
15.8333	-0.001375
15.85	-0.001689
15.8667	-0.001833
15.8833	-0.002176
15.9	-0.00237
15.9167	-0.002335
15.9333	-0.0025
15.95	-0.003605
15.9667	-0.005759
15.9833	-0.007614
16	-0.008509
16.0167	-0.009528
16.0333	-0.011497
16.05	-0.085616
16.0667	-0.311325
16.0833	-0.673095
16.1	-1.11267
16.1167	-1.49254
16.1333	-1.67325
16.15	-1.65772
16.1667	-1.49998
16.1833	-1.28123
16.2	-1.04877
16.2167	-0.839841
16.2333	-0.666995
16.25	-0.526079
16.2667	-0.418014
16.2833	-0.343408
16.3	-0.304882
16.3167	-0.277327
16.3333	-0.254162
16.35	-0.232227
16.3667	-0.210042
16.3833	-0.193247
16.4	-0.179801
16.4167	-0.163309
16.4333	-0.152687
16.45	-0.136665
16.4667	-0.122273
16.4833	-0.110301
16.5	-0.102729
16.5167	-0.093742
16.5333	-0.089775
16.55	-0.082388
16.5667	-0.081191
16.5833	-0.074944
16.6	-0.070247
16.6167	-0.065397
16.6333	-0.060597
16.65	-0.055657
16.6667	-0.050828
16.6833	-0.046538
16.7	-0.042748
16.7167	-0.039637
16.7333	-0.036937
16.75	-0.033827
16.7667	-0.031327
16.7833	-0.028796
16.8	-0.026486
16.8167	-0.024247
16.8333	-0.022148
16.85	-0.020589
16.8667	-0.019191
16.8833	-0.017452
16.9	-0.015653
16.9167	-0.013858
16.9333	-0.012353
16.95	-0.011038
16.9667	-0.009993
16.9833	-0.008498
17	-0.007363
17.0167	-0.006203
17.0333	-0.005214
17.05	-0.004545
17.0667	-0.003846
17.0833	-0.003147
17.1	-0.002448
17.1167	-0.001786
17.1333	-0.001274
17.15	-0.000802
17.1667	-0.000141
17.1833	0.000271
17.2	0.000413
17.2167	0.000429
17.2333	0.000374
17.25	0.000139
17.2667	4e-06
17.2833	-3.1e-05
17.3	4.5e-05
17.3167	0.000105
17.3333	0.000235
17.35	0.000414
17.3667	0.000504
17.3833	0.000294
17.4	7.3e-05
17.4167	3.9e-05
17.4333	-5.6e-05
17.45	2.9e-05
17.4667	4.4e-05
17.4833	0.000118
17.5	8.3e-05
17.5167	0.000225
17.5333	0.000435
17.55	0.000756
17.5667	0.001116
17.5833	0.001417
17.6	0.001527
17.6167	0.001495
17.6333	0.001281
17.65	0.000997
17.6667	0.000823
17.6833	0.000619
17.7	0.000675
17.7167	0.000826
17.7333	0.000956
17.75	0.000905
17.7667	0.001105
17.7833	0.001045
17.8	-1.5e-05
17.8167	-0.000963
17.8333	-1.3e-05
17.85	0.003487
17.8667	0.009118
17.8833	0.016708
17.9	0.021388
17.9167	0.021204
17.9333	0.011256
17.95	0.001439
17.9667	-0.007238
17.9833	-0.012816
18	-0.015473
18.0167	-0.015211
18.0333	-0.013545
18.05	-0.012559
18.0667	-0.012703
18.0833	-0.012986
18.1	-0.01307
18.1167	-0.013801
18.1333	-0.014379
18.15	-0.015266
18.1667	-0.015473
18.1833	-0.014931
18.2	-0.015498
18.2167	-0.017089
18.2333	-0.018385
18.25	-0.019581
18.2667	-0.021817
18.2833	-0.024243
18.3	-0.026769
18.3167	-0.022572
18.3333	0.001005
18.35	0.024022
18.3667	0.044359
18.3833	0.053556
18.4	0.054743
18.4167	0.046625
18.4333	0.035443
18.45	0.022831
18.4667	0.016859
18.4833	0.014467
18.5	0.011395
18.5167	-0.002377
18.5333	-0.012841
18.55	-0.080445
18.5667	-0.26259
18.5833	-0.562904
18.6	-0.955598
18.6167	-1.32108
18.6333	-1.53949
18.65	-1.56109
18.6667	-1.44155
18.6833	-1.23291
18.7	-1.00713
18.7167	-0.786581
18.7333	-0.59139
18.75	-0.424869
18.7667	-0.306868
18.7833	-0.228937
18.8	-0.186756
18.8167	-0.168424
18.8333	-0.153746
18.85	-0.140798
18.8667	-0.13197
18.8833	-0.123232
18.9	-0.109204
18.9167	-0.100491
18.9333	-0.096302
18.95	-0.100664
18.9667	-0.094025
18.9833	-0.082917
19	-0.078799
19.0167	-0.075751
19.0333	-0.064299
19.05	-0.054857
19.0667	-0.048445
19.0833	-0.044453
19.1	-0.040251
19.1167	-0.037406
19.1333	-0.031628
19.15	-0.029529
19.1667	-0.030201
19.1833	-0.028982
19.2	-0.033284
19.2167	-0.033977
19.2333	-0.029099
19.25	-0.022641
19.2667	-0.017673
19.2833	-0.004765
19.3	0.023153
19.3167	0.012774
19.3333	0.006135
19.35	-0.006324
19.3667	-0.014903
19.3833	-0.022353
19.4	-0.034282
19.4167	-0.034674
19.4333	-0.028697
19.45	-0.02332
19.4667	-0.017783
19.4833	-0.014346
19.5	-0.008359
19.5167	0.006369
19.5333	0.006755
19.55	0.002951
19.5667	-0.002603
19.5833	-0.006857
19.6	-0.006961
19.6167	-0.007519
19.6333	-0.008161
19.65	-0.008433
19.6667	-0.007635
19.6833	-0.006607
19.7	-0.005828
19.7167	-0.00665
19.7333	-0.007026
19.75	-0.006943
19.7667	-0.006569
19.7833	-0.007406
19.8	-0.008442
19.8167	-0.008653
19.8333	-0.009421
19.85	-0.009488
19.8667	-0.009166
19.8833	-0.009393
19.9	-0.009801
19.9167	-0.009782
19.9333	-0.00929
19.95	-0.007708
19.9667	-0.006157
19.9833	-0.005005
20	-0.004703
20.0167	-0.004384
20.0333	-0.00351
20.05	-0.002295
20.0667	-0.001401
20.0833	-0.001246
20.1	-0.000292
20.1167	0.001746
20.1333	0.004684
20.15	0.006971
20.1667	0.010119
20.1833	0.012837
20.2	0.018025
20.2167	0.020549
20.2333	0.007157
20.25	-0.006285
20.2667	-0.009027
20.2833	-0.008298
20.3	-0.0072
20.3167	-0.000882
20.3333	0.012803
20.35	0.015789
20.3667	0.012524
20.3833	0.008069
20.4	0.004094
20.4167	0.000341
20.4333	-0.002855
20.45	-0.003731
20.4667	-0.004787
20.4833	-0.003303
20.5	-0.001229
20.5167	0.000145
20.5333	0.001456
20.55	0.002237
20.5667	0.003407
20.5833	0.003548
20.6	0.003959
20.6167	0.004097
20.6333	0.004252
20.65	0.004407
20.6667	0.004312
20.6833	0.003877
20.7	0.003442
20.7167	0.002879
20.7333	0.00236
20.75	0.001272
20.7667	0.000123
20.7833	-0.001475
20.8	-0.002074
20.8167	-0.002108
20.8333	-0.002092
20.85	-0.003095
20.8667	-0.003828
20.8833	-0.004892
20.9	-0.006715
20.9167	-0.008491
20.9333	-0.008248
20.95	-0.006735
20.9667	-0.006572
20.9833	-0.00731
21	-0.009697
21.0167	-0.011407
21.0333	-0.01174
21.05	-0.039702
21.0667	-0.193864
21.0833	-0.480787
21.1	-0.866949
21.1167	-1.25361
21.1333	-1.50401
21.15	-1.57151
21.1667	-1.47258
21.1833	-1.2688
21.2	-1.03051
21.2167	-0.801336
21.2333	-0.602532
21.25	-0.439058
21.2667	-0.311614
21.2833	-0.22532
21.3	-0.174026
21.3167	-0.143371
21.3333	-0.133636
21.35	-0.131411
21.3667	-0.126505
21.3833	-0.12924
21.4	-0.121014
21.4167	-0.120196
21.4333	-0.108687
21.45	-0.098538
21.4667	-0.087019
21.4833	-0.07488
21.5	-0.070411
21.5167	-0.069618
21.5333	-0.067983
21.55	-0.065888
21.5667	-0.063962
21.5833	-0.059547
21.6	-0.051372
21.6167	-0.042332
21.6333	-0.036428
21.65	-0.035985
21.6667	-0.034882
21.6833	-0.032248
21.7	-0.029505
21.7167	-0.027305
21.7333	-0.026441
21.75	-0.025517
21.7667	-0.023524
21.7833	-0.02172
21.8	-0.019476
21.8167	-0.017544
21.8333	-0.016378
21.85	-0.016231
21.8667	-0.014355
21.8833	-0.008948
21.9	-0.005522
21.9167	-0.004626
21.9333	-0.003434
21.95	-0.002213
21.9667	-0.001521
21.9833	-0.00143
22	-0.001158
22.0167	-0.000196
22.0333	0.000433
22.05	0.000891
22.0667	0.00097
22.0833	0.001119
22.1	0.001547
22.1167	0.002238
22.1333	0.002846
22.15	0.003144
22.1667	0.003112
22.1833	0.002799
22.2	0.002427
22.2167	0.002187
22.2333	0.002334
22.25	0.00247
22.2667	0.002037
22.2833	0.001894
22.3	0.00185
22.3167	0.000816
22.3333	0.000758
22.35	0.000519
22.3667	-0.000229
22.3833	-0.000598
22.4	-0.001776
22.4167	-0.003229
22.4333	-0.003869
22.45	-0.003729
22.4667	-0.002898
22.4833	-0.002558
22.5	-0.001927
22.5167	-0.001473
22.5333	-0.000587
22.55	-8.1e-05
22.5667	-0.000455
22.5833	-0.000349
22.6	-0.000212
22.6167	-0.000313
22.6333	-0.000522
22.65	-0.00056
22.6667	-0.000789
22.6833	-0.000458
22.7	-0.000306
22.7167	-0.000452
22.7333	-0.000685
22.75	-0.000628
22.7667	-0.000771
22.7833	-0.000484
22.8	-4.8e-05
22.8167	-3.7e-05
22.8333	0.000147
22.85	0.00084
22.8667	0.001493
22.8833	0.001537
22.9	0.00154
22.9167	0.001518
22.9333	0.001589
22.95	0.001819
22.9667	0.0024
22.9833	0.002931
23	0.002612
23.0167	0.002186
23.0333	0.001743
23.05	0.00173
23.0667	0.003146
23.0833	0.003513
23.1	0.00224
23.1167	0.002397
23.1333	0.004405
23.15	0.005582
23.1667	0.00562
23.1833	0.005347
23.2	0.005385
23.2167	0.006257
23.2333	0.006834
23.25	0.005811
23.2667	0.005069
23.2833	0.005006
23.3	0.005684
23.3167	0.003605
23.3333	-0.010857
23.35	-0.016988
23.3667	-0.02173
23.3833	-0.026212
23.4	-0.027393
23.4167	-0.014678
23.4333	-0.000492
23.45	0.006304
23.4667	0.006
23.4833	0.004056
23.5	0.002342
23.5167	6.5e-05
23.5333	0.004491
23.55	-0.007843
23.5667	-0.128798
23.5833	-0.402802
23.6	-0.763306
23.6167	-1.15184
23.6333	-1.42636
23.65	-1.52462
23.6667	-1.4529
23.6833	-1.27103
23.7	-1.03887
23.7167	-0.804248
23.7333	-0.607114
23.75	-0.438629
23.7667	-0.309555
23.7833	-0.224951
23.8	-0.163976
23.8167	-0.123538
23.8333	-0.100985
23.85	-0.088522
23.8667	-0.081728
23.8833	-0.078625
23.9	-0.075872
23.9167	-0.073113
23.9333	-0.069257
23.95	-0.065202
23.9667	-0.061577
23.9833	-0.056811
24	-0.051346
24.0167	-0.046123
24.0333	-0.041023
24.05	-0.036413
24.0667	-0.033262
24.0833	-0.030532
24.1	-0.029281
24.1167	-0.027722
24.1333	-0.024863
24.15	-0.022624
24.1667	-0.021306
24.1833	-0.020207
24.2	-0.020238
24.2167	-0.017769
24.2333	-0.012359
24.25	-0.00503
24.2667	-0.00182
24.2833	-0.00226
24.3	-0.00273
24.3167	-0.003228
24.3333	-0.003814
24.35	-0.003799
24.3667	-0.003305
24.3833	-0.003021
24.4	-0.002447
24.4167	-0.002019
24.4333	-0.002317
24.45	-0.002386
24.4667	-0.001934
24.4833	-0.001603
24.5	-0.001021
24.5167	6.6e-05
24.5333	0.001058
24.55	0.00136
24.5667	0.002443
24.5833	0.002525
24.6	-0.002763
24.6167	-0.017334
24.6333	-0.019687
24.65	-0.02
24.6667	-0.004703
24.6833	0.007364
24.7	0.012221
24.7167	0.01115
24.7333	0.010153
24.75	0.009206
24.7667	0.008249
24.7833	0.007512
24.8	0.006664
24.8167	0.006193
24.8333	0.005918
24.85	0.005533
24.8667	0.005048
24.8833	0.004602
24.9	0.004127
24.9167	0.003456
24.9333	0.002848
24.95	0.002231
24.9667	0.001863
24.9833	0.001526
25	0.001138
25.0167	0.000639
25.0333	0.000409
25.05	-0.000211
25.0667	-0.000491
25.0833	-0.000942
25.1	-0.001402
25.1167	-0.002219
25.1333	-0.002814
25.15	-0.003239
25.1667	-0.003804
25.1833	-0.004449
25.2	-0.004834
25.2167	-0.004839
25.2333	-0.004887
25.25	-0.005106
25.2667	-0.005374
25.2833	-0.005572
25.3	-0.005391
25.3167	-0.00547
25.3333	-0.005494
25.35	-0.005517
25.3667	-0.005381
25.3833	-0.005144
25.4	-0.004958
25.4167	-0.004829
25.4333	-0.004711
25.45	-0.004113
25.4667	-0.003435
25.4833	-0.002878
25.5	-0.00249
25.5167	-0.001934
25.5333	-0.001651
25.55	-0.001407
25.5667	-0.001094
25.5833	-0.000621
25.6	-8e-06
25.6167	0.000371
25.6333	0.000767
25.65	0.000983
25.6667	0.001549
25.6833	0.001995
25.7	0.002371
25.7167	0.00278
25.7333	0.002976
25.75	0.003712
25.7667	0.004649
25.7833	0.005545
25.8	0.005921
25.8167	0.005935
25.8333	0.005785
25.85	0.006444
25.8667	0.005994
25.8833	0.005374
25.9	0.005923
25.9167	0.006382
25.9333	0.00661
25.95	0.005647
25.9667	0.005665
25.9833	0.007752
26	0.01041
26.0167	0.010105
26.0333	0.009657
26.05	-0.020261
26.0667	-0.165979
26.0833	-0.435057
26.1	-0.802595
26.1167	-1.18108
26.1333	-1.43136
26.15	-1.50677
26.1667	-1.41466
26.1833	-1.22907
26.2	-1.00719
26.2167	-0.785813
26.2333	-0.590871
26.25	-0.430668
26.2667	-0.298575
26.2833	-0.207713
26.3	-0.16088
26.3167	-0.139158
26.3333	-0.126489
26.35	-0.120931
26.3667	-0.117772
26.3833	-0.110793
26.4	-0.107005
26.4167	-0.104179
26.4333	-0.10227
26.45	-0.090512
26.4667	-0.082334
26.4833	-0.078585
26.5	-0.075827
26.5167	-0.074433
26.5333	-0.061531
26.55	-0.053899
26.5667	-0.044797
26.5833	-0.041745
26.6	-0.037983
26.6167	-0.035228
26.6333	-0.033059
26.65	-0.031399
26.6667	-0.02937
26.6833	-0.02862
26.7	-0.027421
26.7167	-0.025381
26.7333	-0.0234
26.75	-0.022199
26.7667	-0.021048
26.7833	-0.020097
26.8	-0.018786
26.8167	-0.015877
26.8333	-0.013571
26.85	-0.012695
26.8667	-0.011779
26.8833	-0.009393
26.9	-0.008377
26.9167	-0.008645
26.9333	-0.00927
26.95	-0.009045
26.9667	-0.010381
26.9833	-0.003456
27	0.031629
27.0167	0.017598
27.0333	0.001386
27.05	-0.009776
27.0667	-0.018529
27.0833	-0.021641
27.1	-0.021053
27.1167	-0.018033
27.1333	-0.015819
27.15	-0.014105
27.1667	-0.012161
27.1833	-0.011287
27.2	-0.010462
27.2167	-0.010417
27.2333	-0.00974
27.25	-0.009503
27.2667	-0.008536
27.2833	-0.008089
27.3	-0.008022
27.3167	-0.007931
27.3333	-0.007684
27.35	-0.007106
27.3667	-0.005849
27.3833	-0.005202
27.4	-0.004075
27.4167	-0.003188
27.4333	-0.001931
27.45	0.000376
27.4667	0.002142
27.4833	0.003179
27.5	0.003786
27.5167	0.00369
27.5333	0.004439
27.55	0.005349
27.5667	0.006079
27.5833	0.006949
27.6	0.007759
27.6167	0.007981
27.6333	0.007432
27.65	0.007373
27.6667	0.007174
27.6833	0.007245
27.7	0.007516
27.7167	0.007682
27.7333	0.007701
27.75	0.008441
27.7667	0.008611
27.7833	0.008021
27.8	0.007211
27.8167	0.006473
27.8333	0.005907
27.85	0.00523
27.8667	0.004944
27.8833	0.005278
27.9	0.005052
27.9167	0.004503
27.9333	0.003856
27.95	0.003898
27.9667	0.003891
27.9833	0.002833
28	0.002876
28.0167	0.00362
28.0333	0.004039
28.05	0.004587
28.0667	0.008786
28.0833	0.002074
28.1	-0.009507
28.1167	-0.011764
28.1333	-0.007846
28.15	-0.006018
28.1667	-0.006581
28.1833	-0.005703
28.2	-0.004336
28.2167	-0.002589
28.2333	-0.002495
28.25	-0.00263
28.2667	0.000484
28.2833	0.003359
28.3	0.000853
28.3167	-0.016467
28.3333	-0.03582
28.35	-0.047534
28.3667	-0.050067
28.3833	-0.046011
28.4	-0.013554
28.4167	0.019621
28.4333	0.03943
28.45	0.042099
28.4667	0.032318
28.4833	0.026336
28.5	0.021885
28.5167	0.017316
28.5333	0.018302
28.55	0.015978
28.5667	-0.084046
28.5833	-0.31674
28.6	-0.654154
28.6167	-1.04289
28.6333	-1.34596
28.65	-1.48174
28.6667	-1.44178
28.6833	-1.27619
28.7	-1.05316
28.7167	-0.82337
28.7333	-0.62478
28.75	-0.458259
28.7667	-0.326218
28.7833	-0.226958
28.8	-0.159117
28.8167	-0.123891
28.8333	-0.104413
28.85	-0.094605
28.8667	-0.085407
28.8833	-0.082579
28.9	-0.077251
28.9167	-0.074317
28.9333	-0.073279
28.95	-0.06543
28.9667	-0.054861
28.9833	-0.043543
29	-0.038784
29.0167	-0.037359
29.0333	-0.034776
29.05	-0.031494
29.0667	-0.028951
29.0833	-0.026549
29.1	-0.025406
29.1167	-0.024386
29.1333	-0.022707
29.15	-0.020997
29.1667	-0.019387
29.1833	-0.017527
29.2	-0.015978
29.2167	-0.01446
29.2333	-0.01267
29.25	-0.011699
29.2667	-0.009919
29.2833	-0.007429
29.3	-0.005629
29.3167	-0.00378
29.3333	0.001355
29.35	0.006569
29.3667	0.007503
29.3833	0.021487
29.4	0.026991
29.4167	0.021624
29.4333	0.011225
29.45	-0.003053
29.4667	-0.004862
29.4833	-0.005741
29.5	-0.00872
29.5167	-0.010129
29.5333	-0.009867
29.55	-0.009066
29.5667	-0.009654
29.5833	-0.010473
29.6	-0.009301
29.6167	-0.006089
29.6333	-0.002954
29.65	0.002152
29.6667	0.006027
29.6833	0.044352
29.7	0.046127
29.7167	0.025114
29.7333	0.024136
29.75	0.013258
29.7667	0.00464
29.7833	-0.005327
29.8	-0.010415
29.8167	-0.010621
29.8333	-0.010049
29.85	-0.010086
29.8667	-0.009794
29.8833	-0.009601
29.9	-0.009679
29.9167	-0.009054
29.9333	-0.007958
29.95	-0.006632
29.9667	-0.005596
29.9833	-0.0045
30	-0.003833
30.0167	-0.003125
30.0333	-0.001961
30.05	-0.000628
30.0667	0.000236
30.0833	0.000559
30.1	0.001402
30.1167	0.002969
30.1333	0.004425
30.15	0.00466
30.1667	0.002556
30.1833	0.001872
30.2	0.001817
30.2167	0.001846
30.2333	0.002016
30.25	0.003007
30.2667	0.003167
30.2833	0.002827
30.3	0.002087
30.3167	0.00198
30.3333	0.002813
30.35	0.003726
30.3667	0.004879
30.3833	0.005482
30.4	0.006515
30.4167	0.006609
30.4333	0.006958
30.45	0.009126
30.4667	0.014635
30.4833	0.009823
30.5	-0.001438
30.5167	-0.00774
30.5333	-0.011662
30.55	-0.010434
30.5667	-0.010886
30.5833	-0.011219
30.6	-0.010531
30.6167	-0.009444
30.6333	-0.00844
30.65	-0.007955
30.6667	-0.00707
30.6833	-0.006156
30.7	-0.005251
30.7167	-0.004128
30.7333	-0.002745
30.75	-0.002203
30.7667	-0.001761
30.7833	-0.000839
30.8	0.000484
30.8167	0.001665
30.8333	0.002393
30.85	0.00281
30.8667	0.003698
30.8833	0.004345
30.9	0.004672
30.9167	0.00519
30.9333	0.005948
30.95	0.005537
30.9667	0.005215
30.9833	0.006674
31	0.008242
31.0167	0.005061
31.0333	0.00651
31.05	-0.00519
31.0667	-0.11692
31.0833	-0.352421
31.1	-0.687961
31.1167	-1.05874
31.1333	-1.33648
31.15	-1.44948
31.1667	-1.39166
31.1833	-1.22191
31.2	-1.00936
31.2167	-0.79072
31.2333	-0.601474
31.25	-0.441608
31.2667	-0.311003
31.2833	-0.216887
31.3	-0.154041
31.3167	-0.123206
31.3333	-0.110835
31.35	-0.101284
31.3667	-0.093604
31.3833	-0.084723
31.4	-0.077903
31.4167	-0.074442
31.4333	-0.069079
31.45	-0.065535
31.4667	-0.061162
31.4833	-0.056918
31.5	-0.051915
31.5167	-0.047292
31.5333	-0.042218
31.55	-0.037394
31.5667	-0.032989
31.5833	-0.027035
31.6	-0.017691
31.6167	-0.020127
31.6333	-0.021084
31.65	-0.021241
31.6667	-0.020939
31.6833	-0.020206
31.7	-0.019403
31.7167	-0.01802
31.7333	-0.016911
31.75	-0.015742
31.7667	-0.015202
31.7833	-0.014033
31.8	-0.012563
31.8167	-0.011274
31.8333	-0.0098
31.85	-0.008646
31.8667	-0.007612
31.8833	-0.006428
31.9	-0.005324
31.9167	-0.004281
31.9333	-0.003412
31.95	-0.002743
31.9667	-0.002154
31.9833	-0.001376
32	-0.000797
32.0167	-0.000188
32.0333	0.00037
32.05	0.000449
32.0667	0.000408
32.0833	0.000457
32.1	0.000446
32.1167	0.000395
32.1333	0.00022
32.15	0.000186
32.1667	0.000141
32.1833	-8.3e-05
32.2	-0.000358
32.2167	-0.000372
32.2333	-0.000574
32.25	-0.001145
32.2667	-0.001247
32.2833	-0.000868
32.3	-0.000469
32.3167	-0.000151
32.3333	-0.000372
32.35	-0.000714
32.3667	-0.000405
32.3833	-0.000126
32.4	6.2e-05
32.4167	0.000331
32.4333	0.000577
32.45	0.001683
32.4667	0.00147
32.4833	0.001396
32.5	0.002373
32.5167	0.003429
32.5333	0.00469
32.55	0.00464
32.5667	0.004341
32.5833	0.003912
32.6	0.006763
32.6167	0.007894
32.6333	0.0071
32.65	0.008747
32.6667	0.010063
32.6833	0.00977
32.7	0.008887
32.7167	0.006383
32.7333	0.003737
32.75	0.00115
32.7667	0.000304
32.7833	-0.002973
32.8	-0.008539
32.8167	-0.009826
32.8333	-0.010111
32.85	-0.009596
32.8667	-0.009262
32.8833	-0.008267
32.9	-0.006642
32.9167	-0.006777
32.9333	-0.005897
32.95	-0.004568
32.9667	-0.003119
32.9833	-0.001609
33	-0.00084
33.0167	0.00048
33.0333	0.000967
33.05	0.001713
33.0667	0.00249
33.0833	0.002246
33.1	0.002083
33.1167	0.00254
33.1333	0.003477
33.15	0.003454
33.1667	0.003181
33.1833	0.003388
33.2	0.003135
33.2167	0.002812
33.2333	0.00251
33.25	0.002267
33.2667	0.001774
33.2833	0.001521
33.3	0.001148
33.3167	0.000585
33.3333	-0.000303
33.35	-0.00153
33.3667	-0.002648
[truncated: 910 more rows]
