# Supplementary material for: HetL, HetR and PatS form a reaction-diffusion system to control pattern formation in the cyanobacterium nostoc PCC 7120
Source: eLife journal article supplement (doi:10.7554/elife.59190), 2020-08-07
Supplement: supp [file elife-59190-supp-v1.zip › elife_poa_e59190_Figure_4_source_data_1.xlsx]

## Sheet: Feuil1
Fig 4A. hetL or hetLD151A in the indicated strains was overexpressed from the petE promoter. Gene expression was induced with 3 µM copper. qRT-PCR experiments were undergone to determine hetL or hetLD151A expression level.
Target	Sample	Expression	Expression SEM	Corrected Expression SEM	Mean Cq	Cq SEM
hetL	WT	1	0.183019	0.183019	26.2219	0.0685794
	WT/PpetE-patS PpetE-hetL	35.4293	5.74808	5.82684	20.5172	0.115894
	WT/PpetE-patS PpetE-hetLD151A	66.1996	6.01571	6.27545	20.5086	0.0171236
