# Supplementary material for: HetL, HetR and PatS form a reaction-diffusion system to control pattern formation in the cyanobacterium nostoc PCC 7120
Source: eLife journal article supplement (doi:10.7554/elife.59190), 2020-08-07
Supplement: supp [file elife-59190-supp-v1.zip › elife_poa_e59190_Figure_5_source_data_1.xlsx]

## Sheet: Feuil1
Fig 5A. hetL expression is induced in response to nitrogen starvation and is dependent on HetR. qRT-PCR was made to determine the hetL expression in WT and ΔhetR strains. hetP expression was determined as inner positive control.
Target	Sample	Expression	Expression SEM	Corrected Expression SEM	Mean Cq	Cq SEM
hetL (WT)	t0	1	0.0260596	0.0260596	26.013	0.0275089
	t8	3.9272	1.1518	1.15393	23.6292	0.457101
	t24	3.88179	0.50586	0.509959	23.7962	0.199493
hetP (WT)	t0	1	0.0542455	0.0542455	30.3856	0.0760278
	t8	26.3885	2.50582	6.14055	25.2693	0.116525
	t24	12.5402	0.447256	2.05841	26.5268	0.015264
hetL (ΔhetR)	t0	1	0.243042	0.250153	23.9839	0.0853543
	t8	1.12451	2.19828	2.19956	23.7234	0.79443
	t24	1.77337	1.01828	1.03077	22.9214	0.0895277
hetP (ΔhetR)	t0	1	0.0494308	0.0522246	30.9208	0.0855204
	t8	1.16865	0.303894	0.304012	30.6165	0.511554
	t24	2.6047	0.380766	0.39968	29.3381	0
