# Supplementary material for: HetL, HetR and PatS form a reaction-diffusion system to control pattern formation in the cyanobacterium nostoc PCC 7120
Source: eLife journal article supplement (doi:10.7554/elife.59190), 2020-08-07
Supplement: supp [file elife-59190-supp-v1.zip › elife_poa_e59190_Figure_6_source_data_1.xlsx]

## Sheet: Feuil1
Fig 6A. BLi assay between HetL and HetR in the presence of PatX6 (HRGTGR). 10 µM of HetL was incubated 5 mins with different concentrations of PatX6 at 0.05, 0.1, 0.5 and 2.5 µM before bringing HetL in contact with the bound HetR.
Time (s)	Binding response (nm)
	0 µM PatX-6	0.05 µM PatX-6	0.1 µM PatX-6	0.5 µM PatX-6	2.5 µM PatX-6
0	0	0	0	0	0
0.2	-0.00342247	-0.00331846	-0.00507436	-0.00237852	-0.00509236
0.4	-0.00506453	-0.00454162	-0.00674065	-0.00450201	-0.00737878
0.6	-0.00552311	-0.00604302	-0.00882107	-0.00458221	-0.00927895
0.8	-0.00639188	-0.00680706	-0.0100347	-0.0051377	-0.00960056
1	-0.00689254	-0.00681634	-0.0100551	-0.00592238	-0.0102168
1.2	-0.00669984	-0.00643247	-0.00971591	-0.00576605	-0.0101142
1.4	-0.00788883	-0.00745614	-0.0105697	-0.00606987	-0.0112074
1.6	-0.0101656	-0.00802496	-0.0109925	-0.00776256	-0.0118181
1.8	-0.0109507	-0.00911865	-0.0119327	-0.00902075	-0.0135412
2	-0.0110422	-0.00895943	-0.0118011	-0.00983525	-0.0132267
2.2	-0.0118971	-0.00958206	-0.0123571	-0.0100627	-0.0133353
2.4	-0.0110377	-0.007884	-0.0116231	-0.00912604	-0.0119189
2.6	-0.0102942	-0.00721482	-0.0111091	-0.00831652	-0.0114395
2.8	-0.0103904	-0.0068742	-0.0102812	-0.00766338	-0.0110915
3	-0.011445	-0.00789959	-0.0111946	-0.00754091	-0.0116473
3.2	-0.0120245	-0.00803473	-0.0111222	-0.00897546	-0.0123739
3.4	-0.0130259	-0.00976084	-0.0117419	-0.00991916	-0.0141821
3.6	-0.0116601	-0.00896574	-0.0109849	-0.00891412	-0.0129624
3.8	-0.0124469	-0.00944016	-0.0113155	-0.00897889	-0.0138478
4	-0.0133907	-0.00980959	-0.0117876	-0.00898407	-0.0138792
4.2	-0.013869	-0.0103183	-0.0114678	-0.00864611	-0.0140613
4.4	-0.0143408	-0.0106317	-0.0114487	-0.00896102	-0.0138433
4.6	-0.0160521	-0.0127347	-0.0127176	-0.0108606	-0.0157553
4.8	-0.0157328	-0.0121992	-0.0126314	-0.0103694	-0.0143776
5	-0.0144269	-0.0120158	-0.0126168	-0.00988666	-0.0145774
5.2	-0.0149522	-0.0128526	-0.0141032	-0.0099845	-0.0143875
5.4	-0.0159521	-0.0131833	-0.0151227	-0.0105527	-0.0147434
5.6	-0.0166528	-0.0134375	-0.0154474	-0.0111835	-0.0146935
5.8	-0.0174234	-0.0146619	-0.0166265	-0.0127236	-0.0161676
6	-0.0180203	-0.0143514	-0.0160385	-0.0134408	-0.015727
6.2	-0.0172062	-0.0134318	-0.0154763	-0.0127663	-0.0149841
6.4	-0.0166916	-0.0134291	-0.0149706	-0.0126799	-0.0147731
6.6	-0.0160873	-0.0125382	-0.0148292	-0.0116448	-0.0140883
6.8	-0.0158791	-0.0116241	-0.0137948	-0.0113917	-0.0133343
7	-0.0159829	-0.0124388	-0.0144872	-0.0115474	-0.0138177
7.2	-0.016272	-0.0123367	-0.0137245	-0.0129467	-0.0147809
7.4	-0.015117	-0.0109879	-0.0128168	-0.0125859	-0.0137626
7.6	-0.0161717	-0.0117265	-0.0131926	-0.0139412	-0.0152996
7.8	-0.0163371	-0.0117149	-0.0137251	-0.0135853	-0.0149102
8	-0.0173191	-0.0122219	-0.0145031	-0.0144553	-0.0153609
8.2	-0.0182971	-0.013492	-0.0159942	-0.0145708	-0.0159631
8.4	-0.0192172	-0.0143436	-0.0166866	-0.014583	-0.0163775
8.6	-0.0187389	-0.0138044	-0.0161033	-0.0137744	-0.015752
8.8	-0.018668	-0.0143383	-0.0164198	-0.0139973	-0.0158198
9	-0.0191654	-0.0146604	-0.0171373	-0.0141521	-0.0172699
9.2	-0.0184107	-0.0139208	-0.0159904	-0.0137067	-0.0165018
9.4	-0.0184755	-0.0139646	-0.0161924	-0.0140888	-0.0169609
9.6	-0.0188636	-0.0145479	-0.0172655	-0.0150411	-0.0173205
9.8	-0.0199783	-0.015308	-0.0177378	-0.0156561	-0.0184827
10	-0.0205457	-0.0168509	-0.0182754	-0.0166301	-0.0180713
10.2	-0.0209983	-0.0176956	-0.0197829	-0.0175372	-0.0185866
10.4	-0.0221545	-0.0193974	-0.0210932	-0.0190148	-0.0203085
10.6	-0.0224709	-0.0198928	-0.0208293	-0.0192905	-0.0200844
10.8	-0.021683	-0.019156	-0.0203699	-0.0193056	-0.0192841
11	-0.0216971	-0.0190739	-0.0210898	-0.0194252	-0.0202176
11.2	-0.022283	-0.0187543	-0.020489	-0.0195789	-0.019701
11.4	-0.021132	-0.0175969	-0.019195	-0.017932	-0.0178542
11.6	-0.0211998	-0.0180863	-0.0195432	-0.0179728	-0.0185179
11.8	-0.0213321	-0.0182166	-0.0197705	-0.0186393	-0.019895
12	-0.0211501	-0.0176401	-0.0184141	-0.0183403	-0.0198582
12.2	-0.0211399	-0.0179091	-0.0188555	-0.0182662	-0.0204818
12.4	-0.0223852	-0.0197924	-0.0207461	-0.0200726	-0.0217579
12.6	-0.0231718	-0.0204077	-0.0211084	-0.0207272	-0.0219162
12.8	-0.0228802	-0.0202342	-0.0205195	-0.0201222	-0.0208495
13	-0.0233742	-0.0208069	-0.0208472	-0.0210437	-0.0213001
13.2	-0.02266	-0.0208665	-0.0206087	-0.020748	-0.0206633
13.4	-0.0228477	-0.0202879	-0.0199648	-0.0210666	-0.0204978
13.6	-0.0229063	-0.0210948	-0.020724	-0.021746	-0.0209567
13.8	-0.0246073	-0.0222308	-0.0221761	-0.0225191	-0.0231004
14	-0.023387	-0.0213237	-0.0214693	-0.0205857	-0.0213001
14.2	-0.0242516	-0.0220224	-0.0219623	-0.0212464	-0.0223011
14.4	-0.0242991	-0.022274	-0.0224839	-0.0202402	-0.0227724
14.6	-0.0245423	-0.0218476	-0.0222718	-0.0204957	-0.0230348
14.8	-0.0236917	-0.0216953	-0.0215034	-0.0206807	-0.0212036
15	-0.024336	-0.0222432	-0.0225575	-0.0219093	-0.021586
15.2	-0.0247824	-0.0221205	-0.0230673	-0.0216395	-0.021665
15.4	-0.024591	-0.0215823	-0.0227232	-0.0226499	-0.0216324
15.6	-0.0232229	-0.020348	-0.0218976	-0.0216356	-0.0204194
15.8	-0.0231453	-0.0214059	-0.0231197	-0.022353	-0.0207225
16	-0.0234374	-0.0219449	-0.0233445	-0.0228024	-0.0205034
16.2	-0.0238819	-0.022218	-0.0231228	-0.0246017	-0.0203234
16.4	-0.0238287	-0.0228206	-0.0233281	-0.0242718	-0.0208077
16.6	-0.0250618	-0.0240215	-0.0243035	-0.0249447	-0.021795
16.8	-0.0259925	-0.0230083	-0.0233075	-0.0248607	-0.0223873
17	-0.0261426	-0.0222597	-0.0226475	-0.0243551	-0.0227505
17.2	-0.0257749	-0.0230831	-0.0230911	-0.023869	-0.0238634
17.4	-0.026013	-0.0229603	-0.0234864	-0.0240735	-0.0228072
17.6	-0.0251314	-0.0224203	-0.0230463	-0.0234308	-0.0223919
17.8	-0.0247969	-0.0233934	-0.0243475	-0.0227924	-0.0229751
18	-0.0244656	-0.0250259	-0.02589	-0.0237169	-0.0234138
18.2	-0.0253145	-0.0247107	-0.0257573	-0.0245182	-0.02317
18.4	-0.0266348	-0.0254345	-0.0263893	-0.0253491	-0.0247559
18.6	-0.0272864	-0.0265612	-0.027267	-0.0261905	-0.0257299
18.8	-0.0269128	-0.0249512	-0.0259433	-0.0260912	-0.0246853
19	-0.0276896	-0.0249868	-0.0261479	-0.026037	-0.025858
19.2	-0.0264769	-0.0242285	-0.0253692	-0.0254955	-0.0252068
19.4	-0.0253012	-0.0236303	-0.0244311	-0.0249901	-0.024245
19.6	-0.0259044	-0.02272	-0.0235447	-0.0246029	-0.0233938
19.8	-0.0264545	-0.023221	-0.0237819	-0.0253967	-0.0231807
20	-0.0258289	-0.0224721	-0.0226027	-0.023963	-0.021655
20.2	-0.0259143	-0.0228445	-0.0233001	-0.0236613	-0.0218397
20.4	-0.0256578	-0.022592	-0.0229816	-0.0234262	-0.0212189
20.6	-0.024857	-0.0230048	-0.0236013	-0.0237638	-0.0219996
20.8	-0.0255464	-0.0248816	-0.0250168	-0.0245677	-0.0236051
21	-0.0250165	-0.0252407	-0.0257743	-0.0266405	-0.024265
21.2	-0.0251342	-0.0252787	-0.0253089	-0.0257507	-0.0240727
21.4	-0.0260069	-0.0259459	-0.0262368	-0.0262917	-0.0258249
21.6	-0.0268619	-0.0268053	-0.0263069	-0.0267675	-0.0255774
21.8	-0.0263195	-0.0258816	-0.0253265	-0.0253471	-0.0252868
22	-0.0272275	-0.0260142	-0.0248961	-0.0251211	-0.0253805
22.2	-0.0285081	-0.026816	-0.0264065	-0.0264263	-0.0266173
22.4	-0.0278284	-0.0275285	-0.0267795	-0.0262986	-0.0249617
22.6	-0.0270932	-0.0271126	-0.0269719	-0.0249563	-0.0242729
22.8	-0.027578	-0.0283306	-0.028012	-0.0262768	-0.0245893
23	-0.0274278	-0.02739	-0.0273477	-0.0261336	-0.0243759
23.2	-0.0262347	-0.0271615	-0.0260837	-0.0258612	-0.0237765
23.4	-0.0260113	-0.0258448	-0.0244982	-0.0261588	-0.0241406
23.6	-0.02578	-0.0256413	-0.0249279	-0.0268206	-0.024664
23.8	-0.0263323	-0.0259522	-0.0250788	-0.0273038	-0.0252819
24	-0.0252223	-0.0263332	-0.0251457	-0.0261043	-0.024809
24.2	-0.0253043	-0.0263149	-0.0259988	-0.0261004	-0.0246763
24.4	-0.0253202	-0.0270313	-0.0268979	-0.0263785	-0.0258408
24.6	-0.0258594	-0.0262725	-0.0260099	-0.0257956	-0.0248862
24.8	-0.0238345	-0.0251544	-0.0255155	-0.0249799	-0.0235912
25	-0.0255695	-0.0253932	-0.0261889	-0.0258568	-0.0242707
25.2	-0.0259356	-0.0250013	-0.0252013	-0.0263355	-0.0247298
25.4	-0.0267168	-0.0257958	-0.0266384	-0.0260916	-0.025046
25.6	-0.027699	-0.0269535	-0.0274588	-0.0278924	-0.0268024
25.8	-0.028739	-0.0265331	-0.0273195	-0.0275402	-0.0263433
26	-0.0282481	-0.0267894	-0.0269456	-0.0277643	-0.0262625
26.2	-0.028331	-0.0270893	-0.027637	-0.0276611	-0.0266393
26.4	-0.0277509	-0.0258447	-0.0260292	-0.0269988	-0.0253712
26.6	-0.0280766	-0.0265787	-0.0259813	-0.0267669	-0.025501
26.8	-0.0273017	-0.0262703	-0.0256012	-0.0270458	-0.0257693
27	-0.0273594	-0.0255939	-0.0251852	-0.0268363	-0.0265269
27.2	-0.0269026	-0.0257028	-0.0252086	-0.0263518	-0.0250643
27.4	-0.0280991	-0.026861	-0.0259453	-0.0271691	-0.0267106
27.6	-0.02713	-0.0259267	-0.0253102	-0.0270248	-0.0266584
27.8	-0.0282558	-0.0267689	-0.0253104	-0.0277365	-0.0274539
28	-0.0286463	-0.0275821	-0.0267215	-0.0276881	-0.0273542
28.2	-0.0286366	-0.0267694	-0.0262323	-0.0277708	-0.0281945
28.4	-0.0280004	-0.0266352	-0.0260174	-0.0280401	-0.0280117
28.6	-0.0272395	-0.0258516	-0.0261425	-0.0277409	-0.0270295
28.8	-0.0265204	-0.0261242	-0.0268056	-0.0271075	-0.0267672
29	-0.0265392	-0.026482	-0.0270315	-0.0278415	-0.0274194
29.2	-0.0271078	-0.0285653	-0.028106	-0.0285354	-0.0283332
29.4	-0.0277509	-0.0288696	-0.0293451	-0.0291484	-0.0278125
29.6	-0.0288154	-0.0306221	-0.0300372	-0.0293462	-0.0283034
29.8	-0.028913	-0.0307846	-0.030546	-0.0297338	-0.0283991
30	0.018628	-0.0192465	-0.001406	-0.0043905	0.004331
30.2	0.057788	0.0140835	0.0347545	0.028447	0.0298915
30.4	0.116031	0.0689455	0.0906195	0.0789645	0.0542615
30.6	0.155612	0.108839	0.136879	0.105057	0.060238
30.8	0.191699	0.140881	0.170657	0.133213	0.0651985
31	0.230323	0.175937	0.205886	0.159991	0.0763705
31.2	0.262858	0.204862	0.23632	0.178228	0.080368
31.4	0.286584	0.223489	0.255904	0.186816	0.0771715
31.6	0.306374	0.237886	0.269532	0.193087	0.0766375
31.8	0.319841	0.247282	0.279566	0.191542	0.0742945
32	0.331427	0.25678	0.287776	0.190464	0.072769
32.2	0.340872	0.262388	0.294276	0.189254	0.0710585
32.4	0.347387	0.26736	0.299144	0.186021	0.0713475
32.6	0.352394	0.26902	0.30009	0.180648	0.0690005
32.8	0.359571	0.273074	0.302189	0.176969	0.0700635
33	0.36332	0.273389	0.302659	0.172958	0.07068
33.2	0.365524	0.273902	0.302717	0.168554	0.0703
33.4	0.371577	0.275989	0.304229	0.165119	0.0716575
33.6	0.375885	0.279262	0.307707	0.163454	0.0748185
33.8	0.378854	0.279858	0.308482	0.162281	0.076253
34	0.381714	0.279238	0.308333	0.158306	0.0750685
34.2	0.385203	0.280402	0.307945	0.157754	0.076319
34.4	0.385941	0.278695	0.305884	0.154681	0.075605
34.6	0.385271	0.275554	0.301489	0.151348	0.0728555
34.8	0.386835	0.274352	0.299464	0.148931	0.0717525
35	0.386534	0.27352	0.298063	0.147253	0.072038
35.2	0.387734	0.273161	0.298438	0.14319	0.071358
35.4	0.388757	0.272672	0.297844	0.14153	0.0721305
35.6	0.389825	0.273876	0.299667	0.139314	0.0726855
35.8	0.38905	0.272122	0.297258	0.137363	0.07222
36	0.390728	0.271235	0.295977	0.13628	0.0727945
36.2	0.392064	0.269388	0.293512	0.135298	0.0735335
36.4	0.394342	0.270128	0.293775	0.135388	0.0733165
36.6	0.3943	0.267087	0.290255	0.134061	0.0721735
36.8	0.397093	0.266726	0.290373	0.133836	0.0725605
37	0.397744	0.266009	0.289796	0.132608	0.0723815
37.2	0.39869	0.265257	0.288497	0.132911	0.072496
37.4	0.3989	0.264746	0.287176	0.13285	0.073291
37.6	0.403444	0.264809	0.285666	0.132718	0.0763625
37.8	0.40438	0.264316	0.284324	0.132277	0.076406
38	0.404289	0.264419	0.282413	0.131584	0.076137
38.2	0.404601	0.264702	0.281438	0.129914	0.0756985
38.4	0.403546	0.261731	0.278004	0.128032	0.0752925
38.6	0.402622	0.259559	0.276094	0.126992	0.074917
38.8	0.401705	0.258251	0.274456	0.125102	0.074514
39	0.402213	0.256794	0.274003	0.124421	0.07607
39.2	0.4014	0.255061	0.271446	0.123923	0.0751835
39.4	0.403956	0.256016	0.272188	0.124047	0.0762615
39.6	0.403985	0.256127	0.271854	0.123271	0.075515
39.8	0.407319	0.258485	0.273641	0.124982	0.076321
40	0.408936	0.258238	0.271652	0.123672	0.075435
40.2	0.412884	0.257949	0.271653	0.12512	0.077886
40.4	0.411654	0.255173	0.268931	0.1244	0.0758135
40.6	0.413546	0.255752	0.269268	0.126302	0.076916
40.8	0.411602	0.251603	0.264922	0.123006	0.0772205
41	0.411401	0.24953	0.263503	0.12453	0.0773495
41.2	0.407151	0.246654	0.262134	0.121356	0.0759485
41.4	0.408558	0.247443	0.261235	0.12131	0.077656
41.6	0.408385	0.246977	0.259937	0.119727	0.0773035
41.8	0.40855	0.246066	0.258557	0.11993	0.077376
42	0.408027	0.247313	0.25884	0.118933	0.0787675
42.2	0.408513	0.246988	0.25664	0.119425	0.0796
42.4	0.412069	0.248035	0.258113	0.121568	0.080747
42.6	0.412227	0.246816	0.257377	0.121844	0.0816335
42.8	0.412668	0.245713	0.257487	0.121703	0.0812375
43	0.415141	0.244276	0.256128	0.122254	0.081607
43.2	0.416661	0.243145	0.255649	0.123266	0.0811785
43.4	0.413357	0.241182	0.25298	0.12039	0.082371
43.6	0.4134	0.240219	0.251663	0.119589	0.0807045
43.8	0.412712	0.239122	0.248801	0.118971	0.080396
44	0.412648	0.240274	0.249344	0.119224	0.0801475
44.2	0.412986	0.240743	0.249513	0.118113	0.0793805
44.4	0.415092	0.238466	0.247956	0.118689	0.0793155
44.6	0.417272	0.238478	0.248877	0.120511	0.0819315
44.8	0.417766	0.238761	0.249107	0.121521	0.0831445
45	0.417942	0.237019	0.247784	0.121593	0.084039
45.2	0.417117	0.23562	0.245651	0.120925	0.0840615
45.4	0.415849	0.235835	0.244895	0.121194	0.082648
45.6	0.414701	0.235223	0.242459	0.12192	0.081996
45.8	0.414886	0.23489	0.24173	0.122061	0.083956
46	0.413973	0.232205	0.238958	0.120657	0.0824235
46.2	0.415216	0.23375	0.239942	0.121601	0.083389
46.4	0.416972	0.233731	0.240541	0.120766	0.0840965
46.6	0.415335	0.232692	0.240674	0.118652	0.0846595
46.8	0.416064	0.231944	0.240098	0.11947	0.0833335
47	0.416214	0.232086	0.238719	0.120871	0.08374
47.2	0.41678	0.230074	0.237768	0.120513	0.083551
47.4	0.414741	0.228156	0.235491	0.120591	0.0828155
47.6	0.416673	0.22763	0.234691	0.120589	0.081823
47.8	0.415859	0.22602	0.234087	0.118897	0.081669
48	0.417503	0.224569	0.235132	0.118911	0.082254
48.2	0.41773	0.225012	0.234495	0.119985	0.0852425
48.4	0.417446	0.22676	0.235412	0.119961	0.084704
48.6	0.416093	0.225065	0.233106	0.119411	0.0862505
48.8	0.418278	0.226572	0.233253	0.120973	0.08806
49	0.417013	0.228552	0.233608	0.121021	0.088703
49.2	0.416793	0.22638	0.232232	0.119804	0.086749
49.4	0.418498	0.223898	0.230749	0.121237	0.08807
49.6	0.420872	0.22425	0.230521	0.120535	0.088385
49.8	0.42043	0.224449	0.230166	0.120516	0.088232
50	0.420668	0.223241	0.229478	0.12058	0.08899
50.2	0.419611	0.223662	0.22894	0.117982	0.086995
50.4	0.420868	0.225228	0.230369	0.11786	0.0878645
50.6	0.418575	0.224352	0.229665	0.119541	0.0864555
50.8	0.41968	0.223989	0.230174	0.119081	0.087287
51	0.42027	0.224206	0.229291	0.12038	0.087038
51.2	0.420868	0.223817	0.22885	0.121926	0.0896895
51.4	0.419617	0.222555	0.226884	0.120146	0.0899295
51.6	0.419135	0.221943	0.225837	0.118058	0.090793
51.8	0.419523	0.220693	0.223308	0.118601	0.0909035
52	0.420281	0.220539	0.223405	0.118945	0.092378
52.2	0.420538	0.220254	0.22362	0.119975	0.090854
52.4	0.421335	0.221062	0.223837	0.121542	0.0912205
52.6	0.421515	0.219408	0.222307	0.122153	0.0899125
52.8	0.421337	0.220477	0.223733	0.121695	0.0902255
53	0.421082	0.219722	0.222823	0.12007	0.089073
53.2	0.423967	0.220206	0.223487	0.121178	0.0928425
53.4	0.4232	0.217124	0.221304	0.119636	0.091438
53.6	0.42521	0.220813	0.224575	0.120031	0.0932225
53.8	0.423893	0.219112	0.222836	0.119085	0.0910605
54	0.422695	0.217782	0.220802	0.117925	0.090977
54.2	0.420045	0.215716	0.21799	0.114857	0.0856365
54.4	0.421252	0.219081	0.221128	0.117518	0.0861605
54.6	0.421713	0.216381	0.217983	0.117829	0.0867715
54.8	0.422524	0.21645	0.218403	0.118659	0.088847
55	0.423824	0.217908	0.220728	0.119922	0.0895575
55.2	0.425237	0.219198	0.222169	0.122801	0.0929865
55.4	0.425722	0.218294	0.220577	0.122897	0.095088
55.6	0.424606	0.218954	0.221182	0.123042	0.095701
55.8	0.424461	0.219416	0.221013	0.122858	0.0943345
56	0.424069	0.218437	0.219265	0.122133	0.0925
56.2	0.423808	0.216563	0.218098	0.121328	0.091816
56.4	0.422961	0.214357	0.216724	0.11925	0.090045
56.6	0.424526	0.215672	0.218676	0.119079	0.0895455
56.8	0.426094	0.21542	0.218911	0.119693	0.0909835
57	0.427402	0.216863	0.220126	0.120496	0.093722
57.2	0.426198	0.215203	0.217858	0.118683	0.093736
57.4	0.427244	0.216516	0.217929	0.119509	0.0951125
57.6	0.426708	0.215744	0.217086	0.120289	0.0960465
57.8	0.427236	0.215869	0.216863	0.122268	0.095851
58	0.427192	0.214291	0.215347	0.121853	0.0950735
58.2	0.430436	0.218766	0.219119	0.124987	0.095654
58.4	0.428941	0.218338	0.218493	0.125218	0.095102
58.6	0.429127	0.217045	0.216712	0.125788	0.0935755
58.8	0.426567	0.215703	0.214286	0.123393	0.092378
59	0.427061	0.216687	0.214312	0.124215	0.091854
59.2	0.425745	0.213567	0.211366	0.123393	0.0918385
59.4	0.427006	0.213362	0.21167	0.122843	0.0924255
59.6	0.425638	0.212866	0.211344	0.11956	0.092621
59.8	0.427059	0.213103	0.211749	0.121035	0.0927675
60	0.426266	0.21124	0.210651	0.120672	0.093087
60.2	0.427654	0.213218	0.211899	0.120925	0.09407
60.4	0.427528	0.212883	0.2113	0.121611	0.094962
60.6	0.429164	0.213501	0.212061	0.123631	0.095608
60.8	0.428585	0.211954	0.211899	0.121131	0.0959505
61	0.431593	0.215397	0.215248	0.122166	0.0980405
61.2	0.430171	0.214581	0.214942	0.120836	0.097083
61.4	0.431769	0.215939	0.215526	0.12089	0.095958
61.6	0.431507	0.214163	0.213678	0.121616	0.09583
61.8	0.432688	0.216062	0.213791	0.122545	0.095994
62	0.429111	0.213545	0.210757	0.122056	0.094623
62.2	0.429609	0.21296	0.210734	0.122622	0.0963945
62.4	0.430005	0.211952	0.210032	0.123985	0.097283
62.6	0.429295	0.213746	0.211428	0.123116	0.0971555
62.8	0.427631	0.212789	0.210682	0.123752	0.0975355
63	0.429812	0.213984	0.212498	0.123945	0.0979175
63.2	0.429625	0.215396	0.213268	0.12473	0.0990845
63.4	0.430218	0.215851	0.213838	0.123952	0.097865
63.6	0.432739	0.21546	0.213281	0.125525	0.0988305
63.8	0.433064	0.214601	0.213758	0.12528	0.099369
64	0.432561	0.212716	0.212617	0.126243	0.0998645
64.2	0.43303	0.213012	0.212753	0.12669	0.0987405
64.4	0.430688	0.211099	0.211283	0.126228	0.0995225
64.6	0.428716	0.210956	0.211028	0.126309	0.099956
64.8	0.431984	0.212085	0.212051	0.128742	0.100526
65	0.430429	0.211112	0.210278	0.127387	0.099413
65.2	0.429681	0.20807	0.207503	0.126736	0.09848
65.4	0.429996	0.207519	0.207284	0.127648	0.100272
65.6	0.43107	0.207873	0.207705	0.128489	0.0999175
65.8	0.427824	0.207749	0.205858	0.126989	0.0990315
66	0.43138	0.209627	0.207476	0.127153	0.099197
66.2	0.432881	0.213311	0.211935	0.130297	0.102217
66.4	0.433588	0.213502	0.211698	0.130205	0.101037
66.6	0.433852	0.213465	0.212634	0.1302	0.102064
66.8	0.435315	0.214336	0.215043	0.13034	0.102392
67	0.432783	0.212847	0.213903	0.130155	0.101839
67.2	0.432951	0.210168	0.209905	0.128552	0.099035
67.4	0.434242	0.211898	0.211322	0.129211	0.100061
67.6	0.432459	0.209189	0.208537	0.12658	0.0983045
67.8	0.431071	0.207625	0.206092	0.126342	0.097927
68	0.431897	0.208231	0.205705	0.12648	0.100086
68.2	0.431831	0.208206	0.206605	0.126275	0.102687
68.4	0.430917	0.207107	0.206586	0.125427	0.10131
68.6	0.4311	0.209614	0.208275	0.127473	0.101865
68.8	0.433766	0.211361	0.209801	0.128124	0.103097
69	0.432189	0.210455	0.208882	0.12735	0.102101
69.2	0.430787	0.208905	0.206188	0.126009	0.0996585
69.4	0.429306	0.208988	0.205617	0.125475	0.0996035
69.6	0.430909	0.208373	0.204353	0.12434	0.100245
69.8	0.42949	0.205835	0.202892	0.123366	0.09776
70	0.431767	0.206918	0.204977	0.125554	0.0993005
70.2	0.433331	0.209102	0.208021	0.126899	0.099413
70.4	0.434976	0.208208	0.206087	0.126205	0.0990865
70.6	0.434638	0.208186	0.205781	0.127137	0.100127
70.8	0.435761	0.209207	0.206423	0.128355	0.102352
71	0.43646	0.209734	0.207527	0.128592	0.102265
71.2	0.434897	0.208026	0.206065	0.127527	0.102249
71.4	0.435044	0.209853	0.208677	0.128513	0.104155
71.6	0.436023	0.20962	0.210056	0.13	0.104555
71.8	0.43416	0.208114	0.208673	0.127595	0.103378
72	0.433785	0.206509	0.206077	0.125838	0.102045
72.2	0.435451	0.207829	0.20729	0.126868	0.103635
72.4	0.435414	0.206932	0.206735	0.127359	0.101887
72.6	0.435144	0.207016	0.206636	0.124702	0.101593
72.8	0.434949	0.208491	0.208127	0.12731	0.101901
73	0.432962	0.208343	0.208735	0.127906	0.102421
73.2	0.432408	0.209878	0.208718	0.127544	0.102001
73.4	0.430766	0.209242	0.206817	0.127247	0.103416
73.6	0.430696	0.208282	0.20514	0.128887	0.103631
73.8	0.432427	0.208885	0.205136	0.129056	0.105374
74	0.434996	0.213628	0.209158	0.131716	0.107459
74.2	0.434009	0.211594	0.207327	0.131145	0.105826
74.4	0.433943	0.211227	0.206773	0.130507	0.104124
74.6	0.43503	0.21359	0.209464	0.13147	0.103543
74.8	0.435754	0.214434	0.209734	0.131262	0.103531
75	0.435841	0.212458	0.20684	0.130602	0.102206
75.2	0.436262	0.211091	0.206649	0.130872	0.103602
75.4	0.437735	0.211528	0.207928	0.131535	0.105452
75.6	0.435901	0.209595	0.2066	0.130704	0.104246
75.8	0.434362	0.208214	0.205569	0.13012	0.103944
76	0.433473	0.206161	0.205209	0.129456	0.103579
76.2	0.435648	0.208184	0.207744	0.130944	0.104856
76.4	0.435762	0.20838	0.207701	0.13076	0.104936
76.6	0.434968	0.206459	0.205767	0.12875	0.104157
76.8	0.436545	0.206652	0.206509	0.128294	0.104227
77	0.436958	0.207501	0.206585	0.126941	0.104597
77.2	0.43757	0.207991	0.20607	0.127201	0.104707
77.4	0.437912	0.208886	0.206582	0.128312	0.105417
77.6	0.43946	0.21127	0.207904	0.129912	0.108263
77.8	0.439427	0.211003	0.20654	0.12979	0.107685
78	0.439229	0.209361	0.205335	0.131024	0.10842
78.2	0.438619	0.208148	0.203715	0.129719	0.107907
78.4	0.440111	0.209543	0.204719	0.130362	0.10945
78.6	0.440352	0.210065	0.204947	0.130081	0.108565
78.8	0.439887	0.209966	0.20485	0.130483	0.109454
79	0.439532	0.212939	0.207611	0.13054	0.10775
79.2	0.4387	0.213527	0.209099	0.131419	0.10796
79.4	0.435379	0.210717	0.207349	0.129895	0.104328
79.6	0.435208	0.210888	0.207761	0.129777	0.103834
79.8	0.435711	0.210656	0.208134	0.128704	0.103557
80	0.437547	0.210674	0.20757	0.129324	0.105823
80.2	0.438603	0.210378	0.205935	0.129643	0.107378
80.4	0.439769	0.210429	0.205354	0.129989	0.109674
80.6	0.440116	0.210661	0.205254	0.132277	0.110684
80.8	0.439609	0.210251	0.205346	0.133329	0.109456
81	0.437992	0.20746	0.203252	0.131339	0.10735
81.2	0.437717	0.206382	0.203581	0.131606	0.105508
81.4	0.436464	0.205232	0.203434	0.129171	0.104609
81.6	0.437247	0.204157	0.20329	0.126599	0.103882
81.8	0.438577	0.20595	0.205449	0.127324	0.106351
82	0.440164	0.208934	0.208135	0.130504	0.109545
82.2	0.441549	0.210933	0.208995	0.130313	0.111212
82.4	0.442377	0.211291	0.209168	0.1326	0.111403
82.6	0.441908	0.211189	0.208777	0.133459	0.111391
82.8	0.440825	0.21061	0.206892	0.131287	0.11046
83	0.440638	0.210014	0.205958	0.130475	0.110238
83.2	0.439105	0.207289	0.20404	0.129564	0.110101
83.4	0.440705	0.20882	0.205582	0.130843	0.110655
83.6	0.442195	0.210216	0.205826	0.13283	0.111681
83.8	0.442872	0.210757	0.207035	0.135208	0.112623
84	0.442489	0.210476	0.206284	0.134637	0.11082
84.2	0.444024	0.213466	0.209332	0.135293	0.110982
84.4	0.443663	0.212345	0.208732	0.134077	0.109356
84.6	0.442096	0.210425	0.20825	0.132629	0.10959
84.8	0.441954	0.20891	0.205867	0.132652	0.108733
85	0.440721	0.208038	0.2053	0.132548	0.109558
85.2	0.438498	0.206897	0.203453	0.132457	0.108224
85.4	0.440053	0.209041	0.206176	0.134919	0.111097
85.6	0.440801	0.21061	0.206781	0.135152	0.110726
85.8	0.440574	0.21032	0.207377	0.135808	0.110753
86	0.442991	0.21049	0.207966	0.136299	0.110253
86.2	0.444051	0.209613	0.207991	0.136467	0.111716
86.4	0.442055	0.207934	0.204657	0.133567	0.110204
86.6	0.442527	0.208941	0.206282	0.13444	0.111892
86.8	0.441282	0.209446	0.206291	0.133191	0.111034
87	0.440076	0.209576	0.207035	0.134644	0.110618
87.2	0.440174	0.211016	0.208198	0.135433	0.110132
87.4	0.440459	0.211675	0.208671	0.136776	0.109255
87.6	0.440375	0.211413	0.208611	0.137474	0.109286
87.8	0.442142	0.212378	0.209001	0.138434	0.110912
88	0.441531	0.21224	0.207918	0.136278	0.111226
88.2	0.441586	0.213509	0.208059	0.136271	0.111173
88.4	0.443221	0.215241	0.209532	0.137785	0.114519
88.6	0.442382	0.212958	0.207036	0.13534	0.111459
88.8	0.444956	0.214049	0.209345	0.136224	0.111622
89	0.445697	0.215063	0.210814	0.137631	0.11154
89.2	0.445573	0.213119	0.208939	0.136612	0.111155
89.4	0.444244	0.21045	0.207159	0.134835	0.109346
89.6	0.445926	0.212636	0.209601	0.13758	0.112716
89.8	0.442964	0.211253	0.208375	0.137482	0.112442
90	0.443312	0.210006	0.207623	0.137522	0.113441
90.2	0.443789	0.211465	0.209007	0.138787	0.114321
90.4	0.445828	0.213445	0.210339	0.139955	0.11556
90.6	0.444491	0.212264	0.208828	0.138078	0.113273
90.8	0.445574	0.212812	0.208499	0.13754	0.113328
91	0.444789	0.213545	0.208212	0.136822	0.112619
91.2	0.446543	0.212907	0.208365	0.137366	0.111997
91.4	0.446016	0.213739	0.209147	0.137325	0.111738
91.6	0.446694	0.213799	0.209819	0.137858	0.113194
91.8	0.44518	0.211665	0.208718	0.136656	0.111076
92	0.446774	0.211658	0.209131	0.136268	0.112028
92.2	0.446273	0.213074	0.210242	0.135373	0.112838
92.4	0.447334	0.212847	0.208853	0.135489	0.113523
92.6	0.445994	0.213462	0.208239	0.136091	0.111361
92.8	0.446991	0.214436	0.208545	0.136836	0.114208
93	0.445624	0.213961	0.20772	0.137235	0.114343
93.2	0.443801	0.211811	0.205704	0.136803	0.113821
93.4	0.442824	0.211181	0.206747	0.136651	0.112005
93.6	0.444919	0.211389	0.20816	0.13707	0.114777
93.8	0.444617	0.21231	0.208564	0.13664	0.11212
94	0.445811	0.213637	0.211011	0.137729	0.11204
94.2	0.446066	0.214481	0.211886	0.13662	0.11046
94.4	0.445828	0.214686	0.211927	0.135959	0.110797
94.6	0.445661	0.213434	0.210846	0.134807	0.109742
94.8	0.447611	0.213883	0.21091	0.134779	0.111713
95	0.446418	0.212726	0.210081	0.133139	0.110148
95.2	0.447026	0.212885	0.21063	0.135876	0.112792
95.4	0.449014	0.214299	0.211202	0.137187	0.114629
95.6	0.448235	0.215204	0.212186	0.137501	0.114294
95.8	0.446074	0.212664	0.21114	0.137415	0.113868
96	0.449116	0.214966	0.211803	0.140691	0.117624
96.2	0.448702	0.214332	0.210185	0.139579	0.116369
96.4	0.447284	0.213546	0.210213	0.138368	0.116206
96.6	0.449265	0.214058	0.210626	0.139715	0.118058
96.8	0.450253	0.217138	0.212487	0.140845	0.119315
97	0.448778	0.215303	0.211412	0.138992	0.116383
97.2	0.449596	0.215706	0.212537	0.13832	0.117996
97.4	0.447522	0.213978	0.211504	0.137928	0.116313
97.6	0.445855	0.214243	0.210436	0.136761	0.113855
97.8	0.446583	0.213829	0.210889	0.136495	0.113315
98	0.446097	0.216007	0.2134	0.137012	0.115564
98.2	0.445774	0.216024	0.212354	0.138505	0.116256
98.4	0.446788	0.216928	0.213235	0.138081	0.116061
98.6	0.447042	0.215946	0.214423	0.137008	0.116659
98.8	0.446082	0.215562	0.213179	0.137879	0.11687
99	0.44858	0.215511	0.212491	0.137503	0.1163
99.2	0.450418	0.216473	0.213191	0.137836	0.114649
99.4	0.450559	0.216381	0.21176	0.139222	0.115276
99.6	0.450126	0.217206	0.211457	0.140467	0.115564
99.8	0.451269	0.217928	0.212847	0.140476	0.11593
100	0.450383	0.217332	0.211998	0.141031	0.117075
100.2	0.448505	0.217003	0.21254	0.140836	0.11915
100.4	0.447607	0.216628	0.212897	0.139799	0.117692
100.6	0.450217	0.216416	0.211753	0.139907	0.119663
100.8	0.448056	0.214606	0.209199	0.139446	0.117715
101	0.446296	0.213221	0.207448	0.139171	0.11716
101.2	0.44563	0.212774	0.206556	0.136536	0.113963
101.4	0.447752	0.212672	0.207207	0.136717	0.115745
101.6	0.445345	0.213062	0.207952	0.13694	0.114666
101.8	0.446748	0.214367	0.20964	0.136743	0.115898
102	0.448726	0.215323	0.211256	0.136678	0.115418
102.2	0.449472	0.214571	0.211844	0.139316	0.117088
102.4	0.451508	0.215965	0.213227	0.141502	0.118657
102.6	0.45156	0.215458	0.213243	0.139845	0.116011
102.8	0.45086	0.214848	0.212229	0.139609	0.116521
103	0.448873	0.214872	0.212118	0.139118	0.116383
103.2	0.448578	0.215025	0.211607	0.138375	0.116589
103.4	0.446821	0.213641	0.210815	0.136894	0.116288
103.6	0.448252	0.215232	0.211899	0.137926	0.118567
103.8	0.448668	0.215825	0.212959	0.13884	0.118416
104	0.451232	0.216664	0.21375	0.138027	0.118799
104.2	0.451253	0.217544	0.213166	0.138041	0.117787
104.4	0.453402	0.220452	0.214178	0.140052	0.117241
104.6	0.453719	0.219971	0.213604	0.141257	0.118647
104.8	0.454754	0.220005	0.212851	0.140749	0.119476
105	0.454815	0.21875	0.211386	0.141936	0.121111
105.2	0.454549	0.21904	0.212554	0.142713	0.121771
105.4	0.452259	0.21716	0.211619	0.141741	0.122588
105.6	0.450388	0.216268	0.210631	0.13924	0.120017
105.8	0.450694	0.218561	0.213069	0.140312	0.121107
106	0.449914	0.218102	0.214156	0.140312	0.11954
106.2	0.450937	0.217943	0.215423	0.139991	0.119182
106.4	0.45135	0.218552	0.215219	0.140248	0.119107
106.6	0.452641	0.21829	0.215495	0.141524	0.121001
106.8	0.454193	0.217224	0.214933	0.142522	0.121307
107	0.454617	0.216181	0.213828	0.142901	0.121823
107.2	0.453912	0.217647	0.213721	0.144063	0.123588
107.4	0.453197	0.216394	0.21286	0.143962	0.12328
107.6	0.453091	0.217179	0.21351	0.144801	0.123138
107.8	0.448927	0.216651	0.211463	0.14157	0.121556
108	0.449466	0.218936	0.212811	0.141744	0.120986
108.2	0.45084	0.219569	0.213304	0.141165	0.121622
108.4	0.452543	0.220897	0.21446	0.141024	0.120219
108.6	0.452665	0.220388	0.213434	0.139634	0.119834
108.8	0.455825	0.220413	0.215814	0.141499	0.119273
109	0.45558	0.21995	0.214797	0.142111	0.119215
109.2	0.456468	0.218541	0.214494	0.142737	0.118703
109.4	0.454825	0.216353	0.212532	0.140734	0.119058
109.6	0.454622	0.216513	0.212505	0.141275	0.118621
109.8	0.453847	0.217525	0.212456	0.142302	0.120505
110	0.453977	0.218234	0.213222	0.140092	0.12075
110.2	0.453849	0.219328	0.214212	0.14043	0.120553
110.4	0.455064	0.220474	0.21503	0.143163	0.121246
110.6	0.45622	0.223821	0.218729	0.146217	0.12312
110.8	0.454962	0.220816	0.214857	0.142888	0.120366
111	0.454474	0.220535	0.21529	0.144282	0.119742
111.2	0.453417	0.218656	0.213264	0.142742	0.118985
111.4	0.455197	0.21985	0.215372	0.142735	0.120312
111.6	0.45378	0.217409	0.213045	0.140355	0.120092
111.8	0.455412	0.220696	0.217764	0.142955	0.123032
112	0.455035	0.220514	0.217331	0.142881	0.122792
112.2	0.456344	0.220709	0.217791	0.143476	0.122578
112.4	0.454518	0.219469	0.215535	0.142334	0.122057
112.6	0.456041	0.220423	0.215814	0.143598	0.12102
112.8	0.456867	0.219297	0.21405	0.143637	0.119559
113	0.458164	0.219466	0.213477	0.144491	0.120503
113.2	0.457256	0.219755	0.214072	0.144295	0.121653
113.4	0.457611	0.221544	0.214833	0.144031	0.120835
113.6	0.456879	0.221217	0.215381	0.144275	0.121112
113.8	0.455322	0.220985	0.214761	0.143607	0.120916
114	0.455622	0.222073	0.216814	0.14258	0.121204
114.2	0.456321	0.223857	0.216979	0.144502	0.121416
114.4	0.456222	0.223054	0.217104	0.145201	0.121705
114.6	0.457477	0.223765	0.216539	0.143887	0.121948
114.8	0.455663	0.222906	0.216295	0.143489	0.121626
115	0.4566	0.223236	0.216459	0.145663	0.121854
115.2	0.45579	0.221584	0.215158	0.144112	0.120683
115.4	0.457073	0.222659	0.216752	0.145086	0.123296
115.6	0.457313	0.224143	0.219823	0.146411	0.124985
115.8	0.460102	0.225313	0.221674	0.148329	0.126804
116	0.458686	0.225125	0.221318	0.146886	0.127402
116.2	0.459262	0.225521	0.222547	0.145612	0.127684
116.4	0.460811	0.224879	0.221926	0.145242	0.125905
116.6	0.459182	0.223511	0.218856	0.143886	0.125136
116.8	0.459579	0.223871	0.218104	0.141607	0.12435
117	0.4588	0.221986	0.216944	0.141449	0.124339
117.2	0.459483	0.223944	0.21787	0.144218	0.126642
117.4	0.45868	0.224081	0.217346	0.144514	0.127369
117.6	0.460369	0.225752	0.220097	0.146162	0.127704
117.8	0.460355	0.226882	0.22032	0.146786	0.127671
118	0.460609	0.229325	0.22143	0.147218	0.127181
118.2	0.461329	0.230923	0.222899	0.148237	0.126774
118.4	0.46084	0.23113	0.222545	0.148214	0.126285
118.6	0.459395	0.229973	0.220543	0.146309	0.125223
118.8	0.46053	0.230208	0.2225	0.147528	0.127141
119	0.464219	0.230374	0.223226	0.150154	0.12918
119.2	0.462556	0.227107	0.220186	0.147296	0.127538
119.4	0.460372	0.225663	0.220225	0.146944	0.125193
119.6	0.461902	0.224478	0.220068	0.147271	0.125896
119.8	0.459784	0.223211	0.217742	0.146283	0.124424
120	0.457597	0.222185	0.216481	0.144756	0.122285
120.2	0.457755	0.224519	0.218029	0.145698	0.122206
120.4	0.458377	0.225025	0.217726	0.144265	0.122525
120.6	0.456614	0.225986	0.217605	0.145825	0.121787
120.8	0.455865	0.225896	0.217694	0.145357	0.121343
121	0.455795	0.226348	0.218606	0.145612	0.121019
121.2	0.458226	0.225458	0.218739	0.145965	0.123873
121.4	0.460073	0.226843	0.220414	0.148206	0.12584
121.6	0.462386	0.226053	0.220448	0.147391	0.126702
121.8	0.463053	0.225855	0.221073	0.147825	0.126908
122	0.462768	0.22729	0.221434	0.147242	0.128352
122.2	0.460064	0.226956	0.221006	0.145541	0.12612
122.4	0.458813	0.225818	0.219931	0.144686	0.124955
122.6	0.456947	0.225917	0.22043	0.143843	0.124088
122.8	0.458289	0.226785	0.220019	0.144493	0.125689
123	0.455891	0.224724	0.218738	0.143848	0.123761
123.2	0.456439	0.225299	0.219024	0.145469	0.124412
123.4	0.456116	0.225256	0.218993	0.143682	0.124266
123.6	0.457085	0.226415	0.219768	0.145697	0.124695
123.8	0.457551	0.22761	0.221651	0.146306	0.124107
124	0.456496	0.225891	0.219672	0.144762	0.12146
124.2	0.455732	0.22459	0.219303	0.145009	0.121122
124.4	0.456915	0.225681	0.221088	0.148242	0.123324
124.6	0.456317	0.223834	0.21913	0.146697	0.123169
124.8	0.455659	0.221573	0.217751	0.146461	0.122888
125	0.457444	0.224098	0.22044	0.149129	0.12646
125.2	0.458516	0.226692	0.223261	0.149828	0.127248
125.4	0.458466	0.226803	0.222658	0.149037	0.126483
125.6	0.458367	0.227537	0.22375	0.149599	0.126658
125.8	0.45796	0.22894	0.224044	0.149754	0.127231
126	0.460892	0.229065	0.223907	0.150313	0.12859
126.2	0.460025	0.228414	0.221776	0.148755	0.127702
126.4	0.460277	0.230334	0.222474	0.149338	0.127403
126.6	0.45984	0.229543	0.221401	0.149081	0.127387
126.8	0.459677	0.22916	0.221046	0.148178	0.126455
127	0.459765	0.22905	0.222504	0.149284	0.124799
127.2	0.460048	0.226032	0.219556	0.149378	0.123989
127.4	0.460581	0.224441	0.219451	0.1489	0.125013
127.6	0.464755	0.22723	0.22171	0.152082	0.127134
127.8	0.465855	0.227878	0.221256	0.152583	0.127327
128	0.466648	0.2303	0.22182	0.153284	0.127621
128.2	0.465862	0.232511	0.224492	0.151908	0.128712
128.4	0.466448	0.231475	0.223337	0.151963	0.127722
128.6	0.463128	0.230274	0.221991	0.149766	0.126646
128.8	0.462599	0.230093	0.22226	0.149693	0.128371
129	0.460265	0.226886	0.219593	0.147449	0.128401
129.2	0.463751	0.228119	0.220046	0.150574	0.130449
129.4	0.462145	0.227458	0.219048	0.150595	0.129682
129.6	0.460033	0.225403	0.217402	0.149459	0.129289
129.8	0.460606	0.226046	0.218564	0.149807	0.129397
130	0.460251	0.227212	0.219633	0.149775	0.129115
130.2	0.45825	0.225803	0.218416	0.147795	0.128052
130.4	0.458114	0.226763	0.21908	0.146596	0.129002
130.6	0.46106	0.229112	0.221568	0.148433	0.130442
130.8	0.460815	0.228046	0.220894	0.148436	0.1285
131	0.461738	0.227994	0.221687	0.148448	0.128391
131.2	0.460523	0.228988	0.222695	0.148364	0.12774
131.4	0.460235	0.22973	0.223208	0.148181	0.127464
131.6	0.460871	0.230423	0.223928	0.149011	0.127106
131.8	0.461305	0.230266	0.223529	0.148824	0.127863
132	0.460902	0.229606	0.222179	0.14932	0.127268
132.2	0.463002	0.227985	0.221088	0.149606	0.127512
132.4	0.464587	0.230175	0.223043	0.151014	0.128551
132.6	0.46411	0.229462	0.221715	0.149502	0.128178
132.8	0.465313	0.230198	0.222809	0.150868	0.128423
133	0.466593	0.231038	0.223189	0.151259	0.128644
133.2	0.46607	0.232	0.225012	0.152218	0.129745
133.4	0.464824	0.229841	0.223281	0.152154	0.12955
133.6	0.46382	0.229491	0.224071	0.151618	0.127398
133.8	0.464605	0.230899	0.225885	0.152632	0.127778
134	0.462411	0.232137	0.226997	0.15239	0.128574
134.2	0.462666	0.230992	0.224637	0.151325	0.126249
134.4	0.463492	0.230883	0.22505	0.150848	0.125786
134.6	0.466713	0.233605	0.226165	0.152695	0.128184
134.8	0.465989	0.233586	0.225793	0.152114	0.129863
135	0.467475	0.231686	0.225309	0.151035	0.129891
135.2	0.469417	0.23331	0.227314	0.152211	0.132431
135.4	0.469357	0.234433	0.227297	0.153592	0.133025
135.6	0.466212	0.231948	0.225952	0.152086	0.132025
135.8	0.46628	0.232385	0.225628	0.151132	0.131491
136	0.468201	0.234068	0.226491	0.153353	0.132718
136.2	0.465961	0.234938	0.226708	0.15306	0.131524
136.4	0.467546	0.235852	0.228869	0.154203	0.132725
136.6	0.466609	0.235229	0.22837	0.153371	0.132026
136.8	0.465458	0.233347	0.226953	0.152803	0.130128
137	0.463386	0.232722	0.226227	0.151611	0.129419
137.2	0.463033	0.231492	0.22597	0.150614	0.129354
137.4	0.461813	0.228963	0.223702	0.148181	0.127961
137.6	0.463454	0.231013	0.224826	0.148395	0.129121
137.8	0.463067	0.23116	0.224222	0.148811	0.129308
138	0.462736	0.230605	0.223481	0.148694	0.128444
138.2	0.461931	0.230347	0.22326	0.148678	0.128412
138.4	0.461727	0.231133	0.222637	0.147121	0.126676
138.6	0.462238	0.231249	0.224282	0.149365	0.126711
138.8	0.463143	0.233475	0.226796	0.150111	0.127679
139	0.464116	0.23539	0.228083	0.149958	0.128364
139.2	0.465527	0.235679	0.227361	0.152571	0.128665
139.4	0.466326	0.238286	0.229842	0.156361	0.132574
139.6	0.467268	0.238102	0.228223	0.15622	0.133372
139.8	0.469282	0.236828	0.226761	0.155619	0.132868
140	0.467747	0.236774	0.226372	0.155076	0.131996
140.2	0.467879	0.238238	0.227785	0.153523	0.132484
140.4	0.467837	0.235607	0.226685	0.152614	0.13008
140.6	0.467481	0.235525	0.227894	0.150714	0.12969
140.8	0.463128	0.233751	0.226251	0.149747	0.12785
141	0.465448	0.234328	0.227942	0.150773	0.128159
141.2	0.466232	0.23293	0.226971	0.150159	0.127604
141.4	0.463768	0.232598	0.225267	0.147855	0.125827
141.6	0.46334	0.231275	0.223899	0.147738	0.12456
141.8	0.464776	0.23202	0.225826	0.148179	0.12697
142	0.464417	0.231723	0.224721	0.14939	0.127589
142.2	0.462691	0.232747	0.225327	0.150367	0.12783
142.4	0.465728	0.235036	0.227386	0.153408	0.132092
142.6	0.465162	0.236294	0.228035	0.154205	0.132633
142.8	0.466369	0.237722	0.22857	0.156066	0.131944
143	0.465898	0.237186	0.229237	0.153749	0.131674
143.2	0.463977	0.236232	0.228073	0.152377	0.130872
143.4	0.463721	0.234902	0.228429	0.150985	0.129196
143.6	0.463522	0.235434	0.228889	0.152504	0.129812
143.8	0.463018	0.23379	0.226163	0.150429	0.130095
144	0.464061	0.234376	0.225172	0.151133	0.129133
144.2	0.467521	0.234604	0.225825	0.151923	0.130086
144.4	0.46534	0.235176	0.22606	0.150832	0.128086
144.6	0.466404	0.233907	0.224837	0.150257	0.127981
144.8	0.4662	0.237183	0.228222	0.149989	0.127465
145	0.46779	0.238236	0.229307	0.15223	0.130644
145.2	0.469143	0.238735	0.230361	0.152777	0.131008
145.4	0.471645	0.239237	0.229449	0.155413	0.132752
145.6	0.470717	0.240714	0.230965	0.154636	0.132817
145.8	0.471618	0.238277	0.229202	0.156535	0.133427
146	0.467218	0.236171	0.228812	0.154241	0.130472
146.2	0.46751	0.236561	0.229535	0.154493	0.130963
146.4	0.466506	0.235619	0.229473	0.15294	0.130795
146.6	0.466537	0.23496	0.229294	0.15269	0.130262
146.8	0.466915	0.236898	0.23026	0.150878	0.129971
147	0.467351	0.236744	0.229387	0.150612	0.131535
147.2	0.466229	0.237709	0.229247	0.150126	0.130986
147.4	0.467076	0.239227	0.231039	0.151366	0.13126
147.6	0.466956	0.23936	0.230697	0.151685	0.132167
147.8	0.465147	0.237576	0.229675	0.152282	0.131929
148	0.46668	0.238185	0.230427	0.152897	0.131789
148.2	0.465423	0.236918	0.228986	0.152228	0.131677
148.4	0.463958	0.235862	0.22744	0.150505	0.132372
148.6	0.463803	0.232426	0.224452	0.149953	0.130743
148.8	0.464267	0.235448	0.227468	0.150941	0.131794
149	0.465618	0.23646	0.227913	0.152529	0.133787
149.2	0.464911	0.235314	0.227791	0.151898	0.132676
149.4	0.466611	0.23581	0.227669	0.153305	0.132806
149.6	0.468141	0.240394	0.231792	0.154042	0.134608
149.8	0.468789	0.237964	0.227874	0.153701	0.135258
150	0.43808	0.220412	0.192671	0.116961	0.0932705
150.2	0.419656	0.221504	0.195086	0.12165	0.0978245
150.4	0.404112	0.21702	0.19517	0.120797	0.097487
150.6	0.38221	0.209279	0.193199	0.120481	0.0975765
150.8	0.36325	0.205417	0.189976	0.116124	0.0936605
151	0.346525	0.202658	0.189188	0.117594	0.0946705
151.2	0.330922	0.198303	0.187803	0.11765	0.0939805
151.4	0.31529	0.195173	0.186206	0.117878	0.09357
151.6	0.300963	0.192837	0.18453	0.11739	0.0924785
151.8	0.289598	0.191015	0.184533	0.118635	0.0934855
152	0.278102	0.187694	0.183629	0.117755	0.0922335
152.2	0.267458	0.185203	0.181827	0.116809	0.091659
152.4	0.258767	0.183125	0.180712	0.116475	0.090618
152.6	0.251395	0.182368	0.180676	0.118039	0.0918665
152.8	0.243601	0.180731	0.179793	0.117591	0.0907925
153	0.236968	0.180522	0.179183	0.118562	0.091213
153.2	0.230075	0.179364	0.178762	0.118601	0.0903605
153.4	0.223974	0.179847	0.179688	0.119046	0.091744
153.6	0.216656	0.176848	0.178064	0.117287	0.0898375
153.8	0.211944	0.175283	0.176553	0.117782	0.0898975
154	0.206319	0.173874	0.176218	0.116611	0.089479
154.2	0.201914	0.172738	0.175029	0.116446	0.089126
154.4	0.198545	0.171357	0.173947	0.11754	0.088862
154.6	0.194955	0.170908	0.17364	0.117876	0.0885965
154.8	0.18998	0.170817	0.173611	0.118035	0.087946
155	0.186493	0.170056	0.173322	0.11878	0.087873
155.2	0.184283	0.170712	0.174432	0.120704	0.089343
155.4	0.180333	0.169359	0.174059	0.119815	0.088817
155.6	0.177743	0.169021	0.173661	0.119936	0.089156
155.8	0.177096	0.16884	0.173437	0.120067	0.090184
156	0.174487	0.168489	0.172967	0.120043	0.0893565
156.2	0.170895	0.168068	0.172629	0.118742	0.0890905
156.4	0.167964	0.167024	0.171277	0.117312	0.0876845
156.6	0.16571	0.166101	0.170788	0.117535	0.0875015
156.8	0.162255	0.16501	0.170643	0.116928	0.08662
157	0.160536	0.164438	0.170734	0.11733	0.0874475
157.2	0.158122	0.163467	0.170401	0.116613	0.086012
157.4	0.156254	0.163854	0.17069	0.117523	0.0869535
157.6	0.154884	0.164268	0.171345	0.117395	0.0866985
157.8	0.1523	0.162679	0.169243	0.116409	0.0857715
158	0.149901	0.161668	0.167513	0.114825	0.0841275
158.2	0.149065	0.160681	0.166979	0.115517	0.0847245
158.4	0.147542	0.159702	0.16637	0.115209	0.083968
158.6	0.145847	0.159451	0.166208	0.114517	0.084335
158.8	0.145135	0.159399	0.167076	0.114784	0.084134
159	0.144471	0.159757	0.168065	0.116297	0.0854295
159.2	0.143004	0.1594	0.167245	0.115422	0.0845765
159.4	0.140698	0.158484	0.166828	0.114928	0.0843595
159.6	0.139419	0.157504	0.166395	0.115125	0.0835695
159.8	0.138677	0.158699	0.167046	0.115903	0.0843235
160	0.136908	0.157972	0.166208	0.11517	0.083634
160.2	0.134517	0.157387	0.165575	0.114936	0.083392
160.4	0.13383	0.157484	0.165094	0.115273	0.0839575
160.6	0.133598	0.159163	0.165977	0.116577	0.085724
160.8	0.132397	0.158467	0.165939	0.116306	0.086373
161	0.131483	0.158172	0.165585	0.115982	0.086181
161.2	0.131648	0.159239	0.166985	0.116833	0.0872325
161.4	0.130627	0.158382	0.166347	0.115449	0.0853045
161.6	0.127011	0.15542	0.164065	0.113099	0.082841
161.8	0.124801	0.154263	0.16286	0.11203	0.0811375
162	0.123758	0.153354	0.163054	0.11186	0.0814665
162.2	0.122436	0.153193	0.162503	0.111921	0.0812145
162.4	0.121947	0.153205	0.162729	0.112782	0.0821225
162.6	0.121012	0.152128	0.161622	0.111879	0.0811125
162.8	0.122652	0.154553	0.163603	0.113734	0.082985
163	0.122229	0.155352	0.163639	0.11433	0.082598
163.2	0.121022	0.15385	0.162792	0.113702	0.082083
163.4	0.120359	0.153946	0.162943	0.113755	0.0824485
163.6	0.121011	0.155671	0.164741	0.115757	0.0846115
163.8	0.119115	0.153432	0.162679	0.114615	0.0831545
164	0.118062	0.152268	0.162101	0.113949	0.0836545
164.2	0.117721	0.152336	0.162478	0.113569	0.083012
164.4	0.116706	0.15228	0.162403	0.11303	0.0825155
164.6	0.116243	0.151047	0.162131	0.112075	0.0816645
164.8	0.115089	0.150773	0.16229	0.112374	0.0823465
165	0.114966	0.151228	0.162586	0.112931	0.0823445
165.2	0.114309	0.15057	0.162112	0.113581	0.0824505
165.4	0.113822	0.149751	0.161579	0.114236	0.0826335
165.6	0.112428	0.149725	0.160624	0.114132	0.0817945
165.8	0.112824	0.149726	0.160394	0.113235	0.0814745
166	0.111197	0.148922	0.159559	0.112158	0.080825
166.2	0.109862	0.148977	0.159117	0.111455	0.081074
166.4	0.108629	0.149	0.159101	0.110558	0.0801115
166.6	0.107835	0.148606	0.158211	0.110109	0.080538
166.8	0.106496	0.148421	0.158184	0.110136	0.080222
167	0.105404	0.147128	0.156712	0.109232	0.0786165
167.2	0.106095	0.148039	0.157941	0.109471	0.0790705
167.4	0.106768	0.147681	0.157801	0.109944	0.08031
167.6	0.106486	0.147492	0.158458	0.109811	0.0799445
167.8	0.107397	0.148175	0.159115	0.111053	0.080532
168	0.108729	0.150746	0.161322	0.112857	0.083058
168.2	0.108152	0.149299	0.160058	0.112993	0.0831165
168.4	0.107444	0.149669	0.160278	0.113487	0.08305
168.6	0.107735	0.149809	0.160255	0.114538	0.0836045
168.8	0.105916	0.149176	0.159446	0.11345	0.083332
169	0.104792	0.147148	0.158768	0.112099	0.081977
169.2	0.103477	0.147155	0.158242	0.111033	0.0811755
169.4	0.10304	0.146953	0.157421	0.110182	0.0809515
169.6	0.102315	0.147738	0.158325	0.109823	0.0811095
169.8	0.101374	0.146743	0.157719	0.109526	0.0791905
170	0.0998405	0.146341	0.156746	0.109207	0.0785925
170.2	0.100922	0.147429	0.158051	0.11056	0.079735
170.4	0.099313	0.146218	0.157312	0.10976	0.0789885
170.6	0.097717	0.144733	0.15567	0.108779	0.0776545
170.8	0.098046	0.145552	0.156338	0.109096	0.079358
171	0.099036	0.146915	0.157005	0.110503	0.080141
171.2	0.0973035	0.144082	0.154854	0.108961	0.0783255
171.4	0.0995385	0.145902	0.157436	0.111463	0.0795215
171.6	0.100456	0.147108	0.158753	0.113026	0.0813955
171.8	0.100662	0.146399	0.158395	0.113166	0.0821735
172	0.100654	0.146248	0.158739	0.113148	0.0827475
172.2	0.100566	0.148066	0.159747	0.113818	0.083509
172.4	0.098759	0.147429	0.158547	0.111898	0.0823595
172.6	0.098012	0.146745	0.15787	0.111452	0.081497
172.8	0.097089	0.147022	0.157771	0.110697	0.0804325
173	0.095831	0.146847	0.157163	0.109107	0.079031
173.2	0.0967335	0.147721	0.15837	0.109495	0.0800105
173.4	0.0956075	0.145952	0.156877	0.10878	0.0793315
173.6	0.094738	0.145625	0.156565	0.107567	0.079159
173.8	0.0947275	0.145784	0.157045	0.108419	0.080102
174	0.094863	0.145465	0.157239	0.109428	0.080405
174.2	0.0941625	0.144365	0.156786	0.109463	0.080258
174.4	0.0945795	0.145251	0.157589	0.110701	0.0804995
174.6	0.094597	0.144965	0.157406	0.11138	0.080627
174.8	0.0946185	0.144741	0.15774	0.110711	0.0800985
175	0.0928645	0.142932	0.156	0.109309	0.079809
175.2	0.0914355	0.142752	0.155496	0.108424	0.0782165
175.4	0.0912545	0.143158	0.156135	0.108669	0.07953
175.6	0.0921075	0.144034	0.156861	0.109115	0.0798925
175.8	0.0923775	0.143711	0.156278	0.110228	0.080446
176	0.094066	0.145604	0.157805	0.111795	0.0817735
176.2	0.095372	0.14631	0.157899	0.113329	0.0834535
176.4	0.0956075	0.146278	0.158039	0.113049	0.0832385
176.6	0.0950005	0.145628	0.157954	0.112364	0.0830185
176.8	0.0937485	0.145492	0.157615	0.111388	0.082319
177	0.092477	0.144294	0.156659	0.110353	0.0810415
177.2	0.0912175	0.143153	0.155896	0.108896	0.0796075
177.4	0.090599	0.143965	0.156297	0.108971	0.080146
177.6	0.0903085	0.143941	0.156004	0.109155	0.079681
177.8	0.090522	0.144007	0.155978	0.109692	0.0801435
178	0.090668	0.144633	0.157012	0.110827	0.0812775
178.2	0.090818	0.145321	0.157329	0.110877	0.082107
178.4	0.0901985	0.143822	0.155649	0.110063	0.081222
178.6	0.090243	0.144002	0.15568	0.110148	0.0818825
178.8	0.089089	0.143433	0.155206	0.108815	0.0808965
179	0.0886315	0.143168	0.154863	0.108789	0.0801765
179.2	0.0888545	0.143615	0.15586	0.109114	0.080586
179.4	0.088593	0.143038	0.15503	0.109288	0.08004
179.6	0.087764	0.143162	0.155612	0.11004	0.0805345
179.8	0.087773	0.142909	0.155142	0.109954	0.079951
180	0.088671	0.142516	0.15569	0.109627	0.0803755
180.2	0.087844	0.141968	0.154949	0.10966	0.0799445
180.4	0.0880655	0.14213	0.156257	0.109944	0.080499
180.6	0.0882485	0.141894	0.155084	0.109222	0.080083
180.8	0.0877085	0.141736	0.155218	0.108751	0.081357
181	0.0867515	0.142467	0.154778	0.108666	0.081638
181.2	0.0868535	0.14144	0.154346	0.108349	0.080749
181.4	0.086058	0.141365	0.154185	0.107421	0.0808855
181.6	0.08634	0.141306	0.15511	0.108506	0.081483
181.8	0.0862725	0.141884	0.15553	0.108671	0.0808755
182	0.086414	0.141369	0.155731	0.108384	0.080214
182.2	0.085634	0.141362	0.154874	0.10835	0.080693
182.4	0.0863635	0.141799	0.155317	0.109093	0.080695
182.6	0.087087	0.142341	0.154906	0.108176	0.080515
182.8	0.088219	0.142235	0.154793	0.109609	0.0806015
183	0.0881391	0.142176	0.154668	0.110716	0.0810611
183.2	0.0888408	0.142301	0.155531	0.110164	0.0808373
183.4	0.0887105	0.142016	0.154753	0.109459	0.0798145
183.6	0.0879235	0.141233	0.154771	0.109622	0.0795915
183.8	0.08684	0.140828	0.154475	0.108461	0.0793445
184	0.086427	0.140537	0.154223	0.107348	0.0787435
184.2	0.0856985	0.14086	0.154186	0.108267	0.079296
184.4	0.0846595	0.140213	0.153709	0.108085	0.079436
184.6	0.0844755	0.140352	0.153497	0.10806	0.0792285
184.8	0.084325	0.140688	0.153375	0.108437	0.0792325
185	0.084172	0.141279	0.153397	0.108018	0.079628
185.2	0.0843565	0.140464	0.153461	0.107716	0.0795505
185.4	0.084879	0.141201	0.154219	0.108673	0.0801975
185.6	0.083211	0.140172	0.153311	0.106954	0.07941
185.8	0.0831215	0.139579	0.153193	0.107348	0.07926
186	0.0828295	0.139431	0.153052	0.107938	0.078543
186.2	0.081337	0.139141	0.151606	0.106991	0.077336
186.4	0.0803145	0.13863	0.150633	0.106003	0.0765035
186.6	0.08057	0.139428	0.151381	0.107566	0.0764795
186.8	0.0804165	0.139788	0.152207	0.107207	0.077708
187	0.08002	0.139904	0.152023	0.106023	0.07753
187.2	0.0804845	0.140793	0.153073	0.106901	0.0781025
187.4	0.0802645	0.14053	0.153635	0.107107	0.078208
187.6	0.081756	0.140284	0.154104	0.107306	0.0791935
187.8	0.0822615	0.140564	0.154014	0.107614	0.078656
188	0.082895	0.140518	0.154433	0.109059	0.079604
188.2	0.0839012	0.140698	0.154826	0.109386	0.0804957
188.4	0.0848685	0.141668	0.155659	0.109949	0.081122
188.6	0.0835303	0.142257	0.155754	0.110013	0.0806183
188.8	0.0828925	0.141924	0.156329	0.110369	0.081354
189	0.0821877	0.141248	0.156435	0.109902	0.0805157
189.2	0.0815618	0.140246	0.155536	0.108778	0.0797208
189.4	0.0805761	0.139964	0.15521	0.107969	0.0797871
189.6	0.080535	0.138748	0.153733	0.107248	0.079275
189.8	0.080412	0.138708	0.152754	0.106956	0.0788975
190	0.0807291	0.13873	0.152358	0.107204	0.0797901
190.2	0.0809096	0.140021	0.153169	0.108	0.0801346
190.4	0.0810164	0.139162	0.152665	0.108116	0.0797429
190.6	0.0817083	0.140464	0.154114	0.109205	0.0809538
190.8	0.0809258	0.140092	0.153146	0.108056	0.0795708
191	0.080888	0.139695	0.152484	0.107455	0.0794
191.2	0.080569	0.138488	0.151814	0.107209	0.0786365
191.4	0.0808612	0.139066	0.152057	0.107869	0.0791687
191.6	0.0796875	0.137601	0.151187	0.106608	0.077768
191.8	0.0808785	0.138088	0.152844	0.108162	0.0788735
192	0.0807501	0.138816	0.153816	0.108867	0.0790026
192.2	0.0808221	0.139386	0.154934	0.109382	0.0803911
192.4	0.0808791	0.140032	0.155831	0.109582	0.0810791
192.6	0.0818543	0.140959	0.156375	0.109596	0.0821368
192.8	0.0813858	0.141186	0.155549	0.108597	0.0820618
193	0.081042	0.141094	0.155682	0.108726	0.0822065
193.2	0.0800493	0.140839	0.154446	0.107831	0.0814678
193.4	0.0800419	0.140076	0.153425	0.107122	0.0805914
193.6	0.078516	0.139206	0.1521	0.107121	0.079336
193.8	0.0780823	0.139253	0.152301	0.107392	0.0795078
194	0.0776103	0.138273	0.15134	0.106947	0.0788923
194.2	0.0785944	0.138174	0.152083	0.107487	0.0791534
194.4	0.0790934	0.138789	0.153106	0.108052	0.0798754
194.6	0.0792809	0.138298	0.153167	0.108254	0.0800404
194.8	0.0794794	0.138009	0.153058	0.107678	0.0788739
195	0.0796224	0.138207	0.153305	0.107882	0.0791844
195.2	0.0786362	0.13814	0.152057	0.10781	0.0784622
195.4	0.0776757	0.137384	0.150443	0.106923	0.0776822
195.6	0.0785177	0.13886	0.152394	0.107172	0.0791382
195.8	0.0784738	0.138504	0.152138	0.108079	0.0800088
196	0.0787077	0.139369	0.152693	0.107737	0.0794987
196.2	0.0793072	0.139372	0.153594	0.107486	0.0798902
196.4	0.0796623	0.139702	0.154673	0.108197	0.0805653
196.6	0.079557	0.139555	0.154081	0.10893	0.0807565
196.8	0.0790007	0.139363	0.153367	0.107779	0.0795252
197	0.0786496	0.139189	0.153051	0.108655	0.0796491
197.2	0.078318	0.139832	0.153098	0.109151	0.08043
197.4	0.0776621	0.139708	0.152913	0.109055	0.0792256
197.6	0.0766655	0.13889	0.151871	0.108067	0.0780705
197.8	0.0780799	0.140118	0.153584	0.110242	0.0796744
198	0.0782589	0.139451	0.153421	0.109404	0.0797904
198.2	0.0777672	0.138536	0.153054	0.109277	0.0786262
198.4	0.0776802	0.138768	0.152852	0.109258	0.0796592
198.6	0.078132	0.139164	0.153596	0.109117	0.0794455
198.8	0.074546	0.136041	0.150825	0.1059	0.077147
199	0.0747549	0.136602	0.15091	0.106095	0.0775619
199.2	0.0757911	0.137967	0.151641	0.106993	0.0791301
199.4	0.075193	0.137188	0.151413	0.106148	0.07757
199.6	0.0746172	0.137653	0.151212	0.106473	0.0777877
199.8	0.0769852	0.139027	0.152532	0.107341	0.0789127
200	0.0763373	0.138188	0.151803	0.106446	0.0782338
200.2	0.075281	0.136899	0.150925	0.104892	0.07629
200.4	0.0754417	0.136598	0.150834	0.10547	0.0773707
200.6	0.0753948	0.135807	0.150503	0.105823	0.0777668
200.8	0.075416	0.136581	0.151301	0.106809	0.07812
201	0.0752978	0.137071	0.151416	0.106743	0.0782548
201.2	0.0754215	0.137509	0.151668	0.107397	0.079266
201.4	0.0759235	0.138735	0.152112	0.107967	0.079347
201.6	0.0754517	0.137962	0.151785	0.107064	0.0783432
201.8	0.0758197	0.138099	0.151689	0.107499	0.0792107
202	0.0764666	0.138812	0.152607	0.109325	0.0803261
202.2	0.0764505	0.13753	0.151747	0.109134	0.0803055
202.4	0.0765985	0.137637	0.152481	0.109525	0.0799195
202.6	0.0771855	0.138394	0.152765	0.109391	0.080342
202.8	0.0760122	0.137306	0.152004	0.108562	0.0802177
203	0.0752282	0.136039	0.151387	0.106544	0.0788632
203.2	0.0747451	0.136753	0.151376	0.105727	0.0775346
203.4	0.0739662	0.135376	0.150032	0.104328	0.0771787
203.6	0.0738782	0.135662	0.150522	0.104699	0.0778102
203.8	0.074799	0.135893	0.150546	0.104698	0.077101
204	0.0748963	0.135838	0.150162	0.105868	0.0772153
204.2	0.0746643	0.135948	0.150743	0.106582	0.0785453
204.4	0.0754994	0.136955	0.1511	0.107298	0.0792644
204.6	0.0761712	0.137597	0.151372	0.108394	0.0788137
204.8	0.0755737	0.137314	0.151175	0.108542	0.0792287
205	0.0743508	0.136121	0.150621	0.107179	0.0786123
205.2	0.0745007	0.135653	0.150652	0.106553	0.0775602
205.4	0.0732545	0.134077	0.149589	0.106174	0.0764585
205.6	0.0721545	0.132317	0.147711	0.104012	0.075132
205.8	0.0720315	0.13142	0.147087	0.103833	0.074588
206	0.0730934	0.132727	0.147954	0.104728	0.0748099
206.2	0.072894	0.132307	0.146943	0.104636	0.0746115
206.4	0.0728605	0.133586	0.14849	0.104156	0.0746685
206.6	0.0732633	0.135874	0.150909	0.105083	0.0761038
206.8	0.0728562	0.142342	0.157043	0.104832	0.0760732
207	0.0734885	0.141628	0.156083	0.105633	0.0764485
207.2	0.0739262	0.14161	0.156526	0.106324	0.0769167
207.4	0.0741393	0.14123	0.155657	0.106788	0.0775928
207.6	0.074546	0.139325	0.154028	0.107763	0.078637
207.8	0.074173	0.133945	0.148445	0.1077	0.078408
208	0.0739055	0.134752	0.149394	0.106751	0.078554
208.2	0.0739678	0.13442	0.148722	0.10608	0.0786308
208.4	0.075231	0.135165	0.148906	0.106766	0.078813
208.6	0.0741678	0.135353	0.148451	0.105968	0.0771978
208.8	0.0759481	0.136359	0.149888	0.107024	0.0779266
209	0.0758678	0.136502	0.149763	0.107483	0.0775253
209.2	0.0757659	0.138002	0.150987	0.10887	0.0790224
209.4	0.0746484	0.136291	0.14991	0.108469	0.0781809
209.6	0.0744398	0.135397	0.149616	0.107374	0.0778718
209.8	0.0733344	0.135371	0.149146	0.106529	0.0773689
210	0.0731441	0.134668	0.148037	0.105696	0.0779366
210.2	0.072139	0.133571	0.1478	0.104561	0.076208
210.4	0.0724041	0.134371	0.147742	0.104409	0.0762721
210.6	0.0732236	0.135678	0.149163	0.105279	0.0766741
210.8	0.0732957	0.134131	0.148524	0.104952	0.0763487
211	0.0732311	0.134903	0.149802	0.105496	0.0755701
211.2	0.0734671	0.134449	0.148752	0.10484	0.0757391
211.4	0.071559	0.133367	0.148011	0.103861	0.074917
211.6	0.070857	0.13255	0.147237	0.10351	0.074711
211.8	0.0709075	0.133744	0.147702	0.104418	0.0756765
212	0.0703259	0.133025	0.146883	0.103187	0.0758709
212.2	0.0705284	0.133543	0.147328	0.102879	0.0754579
212.4	0.0722739	0.135333	0.149574	0.103654	0.0771749
212.6	0.0717292	0.134081	0.148029	0.103071	0.0767307
212.8	0.0708753	0.133175	0.147537	0.102223	0.0755603
213	0.0706449	0.133678	0.147921	0.102514	0.0761734
213.2	0.0707805	0.133536	0.147525	0.103688	0.076563
213.4	0.069987	0.132677	0.146795	0.10381	0.0756155
213.6	0.0700786	0.134139	0.148966	0.104326	0.0762976
213.8	0.0707462	0.133983	0.14833	0.104878	0.0774432
214	0.0701797	0.132836	0.147707	0.104177	0.0759712
214.2	0.0705452	0.132831	0.147666	0.103903	0.0756787
214.4	0.0696346	0.131867	0.146552	0.103276	0.0751461
214.6	0.0704471	0.131978	0.145813	0.104122	0.0760716
214.8	0.0707956	0.132942	0.147214	0.104819	0.0751666
215	0.0717862	0.133778	0.147679	0.105734	0.0759297
215.2	0.0718633	0.13413	0.148576	0.10612	0.0766158
215.4	0.0732007	0.135199	0.149367	0.106633	0.0775007
215.6	0.0731835	0.135914	0.150628	0.106419	0.077399
215.8	0.0730949	0.13573	0.14957	0.105728	0.0781914
216	0.072891	0.135827	0.149533	0.106146	0.0784115
216.2	0.0728771	0.136763	0.150062	0.106323	0.0790736
216.4	0.0740059	0.137409	0.150374	0.106838	0.0792569
216.6	0.0733937	0.135689	0.148584	0.106897	0.0778042
216.8	0.0715823	0.133471	0.146577	0.104128	0.0754708
217	0.0721928	0.133966	0.146719	0.104642	0.0758478
217.2	0.0708835	0.132514	0.145837	0.103806	0.0747105
217.4	0.0703821	0.131851	0.145753	0.103611	0.0743191
217.6	0.0711075	0.132626	0.146874	0.103438	0.075062
217.8	0.073038	0.135381	0.150154	0.10692	0.078075
218	0.0723644	0.134305	0.14957	0.106517	0.0784369
218.2	0.0725729	0.134177	0.149123	0.106651	0.0782204
218.4	0.0718926	0.134308	0.149147	0.106868	0.0791841
218.6	0.0719526	0.134442	0.148479	0.106661	0.0786846
218.8	0.0715666	0.134349	0.148171	0.106239	0.0775066
219	0.0708434	0.133258	0.147602	0.104814	0.0760489
219.2	0.0710106	0.133944	0.148367	0.105051	0.0767886
219.4	0.0710502	0.133068	0.1482	0.103852	0.0756882
219.6	0.0696939	0.131984	0.147627	0.103384	0.0757859
219.8	0.0694052	0.130793	0.146655	0.102847	0.0757587
220	0.0693992	0.131584	0.14761	0.104185	0.0761947
220.2	0.0708484	0.132063	0.148289	0.104203	0.0769419
220.4	0.0697805	0.131569	0.147123	0.103862	0.075882
220.6	0.071485	0.133143	0.148318	0.105095	0.077126
220.8	0.0716978	0.134009	0.149114	0.105486	0.0776433
221	0.0721865	0.134619	0.149044	0.104946	0.077799
221.2	0.0714146	0.134857	0.14846	0.105596	0.0775321
221.4	0.0734296	0.136304	0.150736	0.10676	0.0795626
221.6	0.072409	0.134612	0.1501	0.105579	0.078737
221.8	0.0727589	0.134679	0.149788	0.105528	0.0785779
222	0.0721645	0.133823	0.148618	0.105523	0.077818
222.2	0.0724635	0.133653	0.14874	0.105328	0.0778815
222.4	0.0709635	0.132414	0.147394	0.104937	0.076737
222.6	0.071754	0.133516	0.147559	0.10553	0.076942
222.8	0.0707429	0.131847	0.145868	0.104672	0.0755489
223	0.0708249	0.132541	0.147298	0.104429	0.0761184
223.2	0.0704971	0.131589	0.147069	0.104242	0.0756406
223.4	0.0697972	0.131537	0.146626	0.103373	0.0758552
223.6	0.0700668	0.132563	0.147633	0.104381	0.0765493
223.8	0.0701903	0.132458	0.147864	0.104483	0.0772808
224	0.0697322	0.131244	0.146672	0.103761	0.0768217
224.2	0.0694023	0.132004	0.146277	0.104023	0.0767028
224.4	0.0695467	0.131568	0.145725	0.104107	0.0763547
224.6	0.0689315	0.130124	0.14452	0.10339	0.0754865
224.8	0.0695918	0.131447	0.145642	0.104164	0.0760533
225	0.0707003	0.132263	0.146861	0.105044	0.0770943
225.2	0.0716082	0.132097	0.147624	0.105271	0.0776307
225.4	0.0717528	0.133278	0.148397	0.105618	0.0775083
225.6	0.0709602	0.13273	0.147565	0.104198	0.0774537
225.8	0.069817	0.131688	0.146805	0.103281	0.0758365
226	0.0698003	0.130877	0.146449	0.103931	0.0753318
226.2	0.0695653	0.130759	0.145949	0.103554	0.0754218
226.4	0.0706057	0.129963	0.146009	0.103438	0.0753762
226.6	0.0700756	0.129887	0.146225	0.104171	0.0747246
226.8	0.0709146	0.130207	0.146422	0.10461	0.0757791
227	0.0705262	0.131779	0.146604	0.104862	0.0759227
227.2	0.069996	0.131181	0.146791	0.103798	0.075016
227.4	0.06848	0.130244	0.145554	0.103648	0.0751085
227.6	0.0690731	0.130601	0.146007	0.103664	0.0754036
227.8	0.0693974	0.131135	0.146467	0.103916	0.0759869
228	0.0700318	0.130675	0.146608	0.103972	0.0764973
228.2	0.0697469	0.130575	0.146186	0.104208	0.0767334
228.4	0.0697343	0.131584	0.147537	0.103796	0.0766398
228.6	0.0711221	0.132173	0.147839	0.104038	0.0781631
228.8	0.0701769	0.13187	0.14727	0.103403	0.0778519
229	0.0686876	0.130715	0.146147	0.10161	0.0767221
229.2	0.0685491	0.130257	0.146175	0.101978	0.0760301
229.4	0.0690004	0.129963	0.145676	0.10246	0.0761454
229.6	0.0668079	0.128819	0.144457	0.101444	0.0743189
229.8	0.0672992	0.128797	0.145154	0.102197	0.0744022
230	0.0682887	0.130474	0.146022	0.104212	0.0755057
230.2	0.0676187	0.131101	0.145805	0.103558	0.0756347
230.4	0.0678289	0.131718	0.145819	0.103522	0.0758664
230.6	0.0681741	0.131488	0.145882	0.104831	0.0764596
230.8	0.0680256	0.130846	0.144371	0.104017	0.0764826
231	0.0680522	0.130071	0.144347	0.103414	0.0765502
231.2	0.0696318	0.130869	0.14539	0.104827	0.0778043
231.4	0.0703766	0.130974	0.146225	0.104965	0.0784286
231.6	0.0716212	0.132824	0.147914	0.105438	0.0793487
231.8	0.0715121	0.13262	0.148126	0.105287	0.0785086
232	0.0720406	0.132792	0.148314	0.105449	0.0782801
232.2	0.0711124	0.132348	0.148062	0.10494	0.0773959
232.4	0.0714246	0.132023	0.147473	0.105232	0.0772316
232.6	0.0701781	0.130074	0.146387	0.104319	0.0759281
232.8	0.0709461	0.130298	0.147337	0.104691	0.0761526
233	0.0686215	0.129222	0.145496	0.102948	0.07466
233.2	0.0689384	0.128664	0.144421	0.103019	0.0748589
233.4	0.0691229	0.129296	0.145199	0.103904	0.0751209
233.6	0.0687875	0.129784	0.145189	0.103177	0.075127
233.8	0.0678217	0.128268	0.143801	0.101862	0.0748312
234	0.069507	0.128974	0.144853	0.103455	0.0762235
234.2	0.0689137	0.129471	0.145069	0.102326	0.0759987
234.4	0.066838	0.127526	0.143249	0.0999915	0.0737805
234.6	0.0673003	0.127584	0.143419	0.100556	0.0744043
234.8	0.0676373	0.128838	0.14399	0.102315	0.0748638
235	0.0681921	0.12908	0.145023	0.102136	0.0752546
235.2	0.0675947	0.128782	0.14545	0.102675	0.0742947
235.4	0.0691553	0.130284	0.146778	0.104278	0.0765458
235.6	0.0683525	0.129398	0.146213	0.103375	0.076084
235.8	0.0686054	0.130096	0.14731	0.10287	0.0764164
236	0.0669207	0.129381	0.14596	0.102181	0.0756217
236.2	0.0685956	0.129564	0.146282	0.10363	0.0778341
236.4	0.06831	0.129343	0.146217	0.1033	0.0772785
236.6	0.0704229	0.130937	0.146839	0.104958	0.0784049
236.8	0.0707459	0.131726	0.147457	0.10625	0.0792019
237	0.0714976	0.132075	0.147969	0.106038	0.0795696
237.2	0.0713035	0.131768	0.147527	0.105179	0.0791265
237.4	0.0718773	0.131772	0.147905	0.105312	0.0797683
237.6	0.0701606	0.131232	0.147505	0.104849	0.0795276
237.8	0.0698685	0.130646	0.147203	0.104059	0.0786555
238	0.0698982	0.130229	0.146543	0.103922	0.0791197
238.2	0.0697647	0.130576	0.146943	0.103811	0.0788977
238.4	0.0687972	0.129888	0.145681	0.103161	0.0778162
238.6	0.069484	0.130153	0.146209	0.103902	0.078555
238.8	0.0689717	0.129575	0.145544	0.103448	0.0784322
239	0.0679247	0.129199	0.145479	0.103388	0.0768902
239.2	0.0675139	0.128958	0.144598	0.102994	0.0761789
239.4	0.068018	0.129416	0.145397	0.103663	0.0768525
239.6	0.0687965	0.129244	0.145383	0.102757	0.0760285
239.8	0.0693723	0.129187	0.145145	0.102246	0.0755888
240	0.0706138	0.129856	0.145824	0.102735	0.0765393
240.2	0.0707987	0.130153	0.146769	0.103543	0.0772817
240.4	0.0708101	0.13028	0.146422	0.103405	0.0774531
240.6	0.0699638	0.130338	0.146948	0.104073	0.0769863
240.8	0.069225	0.129829	0.146204	0.103611	0.0770455
241	0.0689285	0.129976	0.145839	0.104051	0.0772155
241.2	0.0681823	0.128551	0.144685	0.102782	0.0760958
241.4	0.0681803	0.128553	0.144811	0.103377	0.0760158
241.6	0.0683616	0.128739	0.144856	0.103781	0.0765201
241.8	0.06863	0.12836	0.144475	0.104171	0.077019
242	0.0696548	0.129219	0.14562	0.104314	0.0770893
242.2	0.0707336	0.130163	0.146033	0.104733	0.0772731
242.4	0.0705635	0.129679	0.145625	0.104394	0.076615
242.6	0.069046	0.127783	0.143641	0.102785	0.075068
242.8	0.0685136	0.128236	0.144349	0.103165	0.0743206
243	0.0679134	0.127232	0.143611	0.102812	0.0739009
243.2	0.066592	0.127218	0.143838	0.102835	0.074265
243.4	0.0678391	0.128831	0.145173	0.104412	0.0761186
243.6	0.0693721	0.130262	0.1466	0.105193	0.0771781
243.8	0.0703944	0.130112	0.146271	0.10485	0.0776449
244	0.0698222	0.130201	0.14609	0.105245	0.0783372
244.2	0.0708249	0.130391	0.146547	0.105992	0.0789579
244.4	0.0699938	0.128772	0.1451	0.103898	0.0768788
244.6	0.0701371	0.128593	0.144787	0.10409	0.0771826
244.8	0.069913	0.129405	0.145794	0.104963	0.078214
245	0.0698368	0.129247	0.146584	0.104951	0.0776773
245.2	0.0692069	0.127432	0.144662	0.104162	0.0767449
245.4	0.0695662	0.128529	0.145613	0.104928	0.0776377
245.6	0.0693544	0.128505	0.145766	0.104545	0.0768914
245.8	0.0683764	0.126709	0.144381	0.103538	0.0758169
246	0.06838	0.126297	0.143552	0.102543	0.0753725
246.2	0.0689697	0.127204	0.144605	0.102551	0.0755247
246.4	0.067385	0.125841	0.143354	0.101743	0.0744385
246.6	0.0671588	0.125639	0.143052	0.102259	0.0747133
246.8	0.0675718	0.127116	0.143876	0.102782	0.0750443
247	0.0684429	0.127749	0.144011	0.103703	0.0760394
247.2	0.0679039	0.1281	0.144071	0.103962	0.0759294
247.4	0.0687022	0.129119	0.144705	0.103881	0.0771552
247.6	0.0681403	0.127499	0.143648	0.103078	0.0762563
247.8	0.0684189	0.127566	0.144275	0.103468	0.0761829
248	0.0677267	0.127343	0.144205	0.103337	0.0759672
248.2	0.0682164	0.127289	0.144253	0.103285	0.0763589
248.4	0.0674505	0.126927	0.144684	0.103826	0.075892
248.6	0.0681849	0.127987	0.144799	0.103229	0.0766189
248.8	0.0679374	0.128189	0.144816	0.103547	0.0772314
249	0.0691128	0.128471	0.145062	0.103438	0.0768058
249.2	0.0697768	0.12933	0.146205	0.104378	0.0776568
249.4	0.0710924	0.129783	0.145775	0.104869	0.0775439
249.6	0.0699293	0.130099	0.145929	0.105436	0.0772653
249.8	0.0690447	0.128638	0.144741	0.103851	0.0757432
250	0.0672282	0.128157	0.14448	0.103747	0.0751722
250.2	0.0681202	0.128082	0.144876	0.103448	0.0758927
250.4	0.0688518	0.127628	0.145828	0.104007	0.0768883
250.6	0.0701733	0.128017	0.146897	0.103857	0.0782523
250.8	0.0722727	0.129618	0.148181	0.105368	0.0795567
251	0.0732039	0.129097	0.148011	0.105324	0.0798624
251.2	0.0721881	0.128811	0.146914	0.105494	0.0793261
251.4	0.0701934	0.128647	0.146066	0.104103	0.0779164
251.6	0.0693852	0.12798	0.145157	0.103577	0.0769112
251.8	0.0694571	0.127807	0.145708	0.103771	0.0774726
252	0.069259	0.128743	0.146057	0.104562	0.0777125
252.2	0.0688687	0.12842	0.146038	0.104743	0.0772862
252.4	0.0691234	0.128596	0.145781	0.104811	0.0777929
252.6	0.0697575	0.129484	0.146514	0.105827	0.0783945
252.8	0.0692977	0.128893	0.145609	0.105313	0.0769312
253	0.0678455	0.127846	0.144473	0.103964	0.076368
253.2	0.0675944	0.127733	0.144147	0.103496	0.0756524
253.4	0.0673614	0.12771	0.143859	0.103439	0.0753724
253.6	0.0671276	0.12642	0.143329	0.102357	0.0753396
253.8	0.0664701	0.126648	0.143544	0.102136	0.0748391
254	0.0681624	0.127051	0.144166	0.103048	0.0760064
254.2	0.0678734	0.127057	0.144332	0.102126	0.0760814
254.4	0.0696287	0.128359	0.145644	0.103168	0.0773032
254.6	0.0683763	0.128661	0.145234	0.1034	0.0758008
254.8	0.0690108	0.129257	0.145639	0.104888	0.0775553
255	0.069105	0.129417	0.146282	0.105014	0.0775205
255.2	0.0695145	0.130324	0.146455	0.106079	0.078217
255.4	0.0686019	0.128615	0.145463	0.105734	0.0775474
255.6	0.0704177	0.129145	0.145976	0.106847	0.0788117
255.8	0.0691955	0.128338	0.144545	0.10499	0.077629
256	0.0690463	0.129158	0.145103	0.104818	0.0775123
256.2	0.0687616	0.128739	0.144993	0.104998	0.0770211
256.4	0.0683828	0.128944	0.145114	0.103687	0.0764493
256.6	0.0668067	0.128035	0.144358	0.102938	0.0749612
256.8	0.0679943	0.12905	0.145385	0.102986	0.0756433
257	0.0680034	0.128712	0.145336	0.103669	0.0760089
257.2	0.0694861	0.128657	0.145602	0.103756	0.0763876
257.4	0.0694062	0.129039	0.145522	0.103902	0.0763172
257.6	0.0711164	0.130185	0.146688	0.103877	0.0780584
257.8	0.0708083	0.129469	0.145989	0.104509	0.0770998
258	0.0694376	0.129025	0.145298	0.102669	0.0757901
258.2	0.0687751	0.128906	0.145535	0.102304	0.0761521
258.4	0.0696868	0.129756	0.146613	0.103793	0.0770213
258.6	0.0693696	0.129439	0.146278	0.104424	0.0775516
258.8	0.069197	0.12907	0.146311	0.104053	0.078182
259	0.0713634	0.129647	0.146904	0.10556	0.0794809
259.2	0.0708492	0.129253	0.146377	0.104752	0.0789572
259.4	0.0711427	0.128436	0.145586	0.104949	0.0792167
259.6	0.0722516	0.129674	0.147018	0.105295	0.0790761
259.8	0.0718374	0.12909	0.146347	0.105591	0.0784939
260	0.0709518	0.128398	0.145266	0.10518	0.0777788
260.2	0.0712352	0.127862	0.144897	0.105922	0.0777757
260.4	0.0705323	0.127483	0.144264	0.104757	0.0772433
260.6	0.0691817	0.126217	0.142718	0.104566	0.0760897
260.8	0.0701475	0.128038	0.144826	0.104974	0.0776675
261	0.069574	0.128347	0.145089	0.104941	0.078208
261.2	0.0700568	0.129392	0.145835	0.105512	0.0789003
261.4	0.0708215	0.129946	0.147041	0.106651	0.080088
261.6	0.0703469	0.129204	0.146601	0.105835	0.0798754
261.8	0.0707506	0.128977	0.145843	0.105442	0.0800321
262	0.0722982	0.129438	0.146073	0.105114	0.0799552
262.2	0.0719599	0.129399	0.146273	0.104753	0.0793569
262.4	0.0708469	0.13015	0.146222	0.104221	0.0782919
262.6	0.0709823	0.12965	0.1456	0.104368	0.0791573
262.8	0.0702364	0.129347	0.14522	0.103815	0.0775864
263	0.0689509	0.127873	0.144204	0.103754	0.0772494
263.2	0.0685302	0.127945	0.143482	0.103545	0.0772417
263.4	0.0690891	0.126568	0.143043	0.103481	0.0769121
263.6	0.0691227	0.127832	0.143918	0.103012	0.0762702
263.8	0.0689139	0.127149	0.143735	0.102922	0.0771399
264	0.0693359	0.128491	0.1452	0.104142	0.0769949
264.2	0.0700591	0.128848	0.145983	0.104625	0.0777316
264.4	0.0700953	0.129185	0.146038	0.104958	0.0778518
264.6	0.0701554	0.129416	0.145837	0.105534	0.0782484
264.8	0.0703366	0.129321	0.145531	0.106178	0.0777616
265	0.0705101	0.128774	0.145198	0.105518	0.0775606
265.2	0.0694699	0.128324	0.144675	0.105075	0.0765554
265.4	0.0696791	0.128511	0.144468	0.105231	0.0768771
265.6	0.0689676	0.127367	0.143898	0.103997	0.0757186
265.8	0.0691784	0.127323	0.144228	0.103745	0.0751234
266	0.068215	0.127435	0.143936	0.103232	0.0751255
266.2	0.0685987	0.126935	0.14321	0.10267	0.0753237
266.4	0.0674737	0.126244	0.143085	0.101766	0.0743132
266.6	0.0684496	0.127172	0.143956	0.103166	0.0748251
266.8	0.0688671	0.127357	0.144214	0.103992	0.0754671
267	0.0696558	0.127812	0.144225	0.104868	0.0757883
267.2	0.0695453	0.127629	0.144848	0.105606	0.0759273
267.4	0.0697285	0.127716	0.144873	0.105702	0.0761755
267.6	0.0690345	0.127295	0.144444	0.104843	0.07702
267.8	0.0683049	0.127391	0.144234	0.104526	0.0769404
268	0.0686212	0.126504	0.144078	0.104326	0.0765297
268.2	0.0694557	0.127101	0.144609	0.104155	0.0770047
268.4	0.0688725	0.126635	0.143872	0.102909	0.076587
268.6	0.0686814	0.126095	0.144089	0.103044	0.0761539
268.8	0.0683477	0.126125	0.143885	0.101966	0.0761632
269	0.0686059	0.126895	0.145001	0.102552	0.0770379
269.2	0.0669966	0.126091	0.143942	0.101915	0.0757706
269.4	0.0678087	0.12674	0.144471	0.103928	0.0765087
269.6	0.0692673	0.128328	0.145976	0.104658	0.0772128
269.8	0.0699612	0.128681	0.146626	0.106267	0.0770812
