# Supplementary material for: HetL, HetR and PatS form a reaction-diffusion system to control pattern formation in the cyanobacterium nostoc PCC 7120
Source: eLife journal article supplement (doi:10.7554/elife.59190), 2020-08-07
Supplement: supp [file elife-59190-supp-v1.zip › elife_poa_e59190_Figure_7_source_data_1.xlsx]

## Sheet: Feuil1
Fig 7B. Bacterial two hybrid assay between HetR and HetL paralogs. BTH101 strain was transformed with pKT25-hetR and pUT18C-all4303 or pUT18C-all3256, β-galactosidase activities were measured as described in section “Materials and Methods” and were expressed in Miller units. Strains producing the T18 and T25 served as negative control. Strains producing T18-Zip and T25-Zip served as positive cont…
Raw data
Three independent assays	OD600	OD420 at T1	OD420 at T2	Miller units		b-galactosidase activities
Time (s)		0	240			Sample	Average Miller units	STDEV
Temperature (˚C)		28.6	28.4			HetR-All3256	0.601	0.016122
HetR-All3256	0.5896	0.1674	0.1867	8.89838		HetR-All4303	0.612133	0.0110528
HetR-All3256	0.6124	0.176	0.1961	8.89328		HetR-HetL	0.556833	0.0187474
HetR-All3256	0.5999	0.1672	0.1888	9.77317		Control +	0.506567	0.0552957
HetR-All4303	0.6214	0.3111	1.0118	305.165		Control -	0.362633	0.106594
HetR-All4303	0.6151	0.2988	1.0135	314.716
HetR-All4303	0.5774	0.2563	0.7605	237.815
HetR-HetL	0.5407	0.3962	1.6707	645.861
HetR-HetL	0.5524	0.3962	1.6566	623.919
HetR-HetL	0.5701	0.408	1.6911	613.649
Control +	0.4693	0.5091	2.0916	937.648
Control +	0.4803	0.5058	2.1048	923.352
Control +	0.4856	0.5219	2.2987	1013.62
Control -	0.3058	0.1031	0.1157	12.1888
Control -	0.2965	0.107	0.1216	14.6508
Control -	0.326	0.1046	0.1195	13.3688
