# Supplementary material for: HetL, HetR and PatS form a reaction-diffusion system to control pattern formation in the cyanobacterium nostoc PCC 7120
Source: eLife. 2020 Aug 7;9:e59190. doi: 10.7554/eLife.59190 (PMC7476756; doi:10.7554/eLife.59190)
Supplement: Table 1—source data 1. [file elife-59190-table1-data1.xlsx]

## Sheet: Feuil1
Raw data for hetrocyst intervals and percentages
wt t24		WT/hetLD151A oe t24		WT/patS hetL oe t24		WT/patS hetL oe t48
interval	percentage	interval	percentage	interval	percentage	interval	percentage
0	0	0	0.88495575	0	25.3968254	0	41.7582418
1	0	1	0	1	4.76190476	1	5.49450549
2	0	2	0.88495575	2	5.82010582	2	5.49450549
3	0	3	0.88495575	3	3.7037037	3	10.989011
4	2.5	4	3.53982301	4	6.34920635	4	14.2857143
5	2.5	5	5.30973451	5	5.29100529	5	5.49450549
6	4.16666667	6	13.2743363	6	4.76190476	6	6.59340659
7	6.66666667	7	11.5044248	7	5.82010582	7	2.1978022
8	11.6666667	8	10.619469	8	4.23280423	8	3.2967033
9	15.8333333	9	15.9292035	9	5.82010582	9	1.0989011
10	10	10	10.619469	10	7.93650794	10	3.2967033
11	10.8333333	11	8.84955752	11	5.82010582	11	0
12	7.5	12	5.30973451	12	4.23280423	12	0
13	4.16666667	13	3.53982301	13	3.17460317	13	0
14	8.33333333	14	3.53982301	14	2.11640212	14	0
15	5	15	1.7699115	15	1.05820106	15	0
16	4.16666667	16	0.88495575	16	0	16	0
17	1.66666667	17	0.88495575	17	1.05820106	17	0
18	0.83333333	18	0	18	0	18	0
19	1.66666667	19	0	19	0.52910053	19	0
20	1.66666667	20	0.88495575	20	0	20	0
21	0.83333333	21	0.88495575	21	0.52910053	21	0
22	0	22	0	22	1.05820106	22	0
23	0	23	0	23	0	23	0
24	0	24	0	24	0.52910053	24	0
25	0	25	0	25	0	25	0
