# Supplementary figures and images for: HetL, HetR and PatS form a reaction-diffusion system to control pattern formation in the cyanobacterium nostoc PCC 7120
Source: eLife journal article supplement (doi:10.7554/elife.59190), 2020-08-07

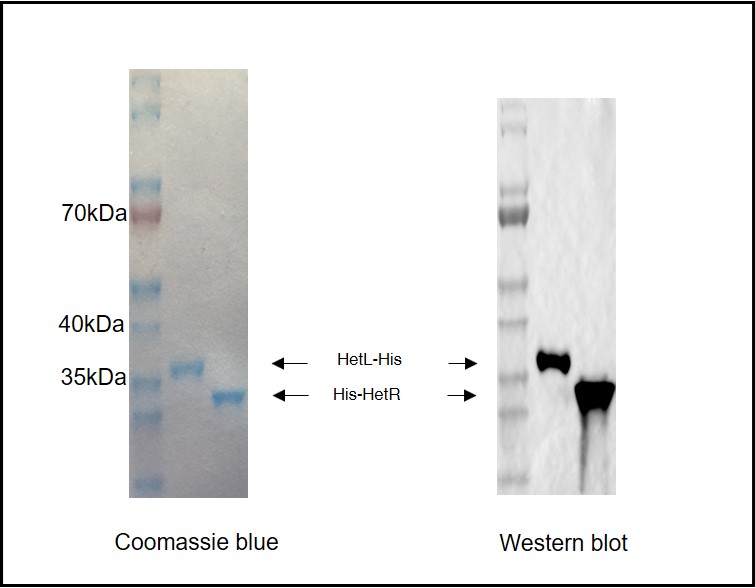

Supplement: supp [file elife-59190-supp-v1.zip › elife_poa_e59190_Figure_1_figure_supplement_1.jpg]

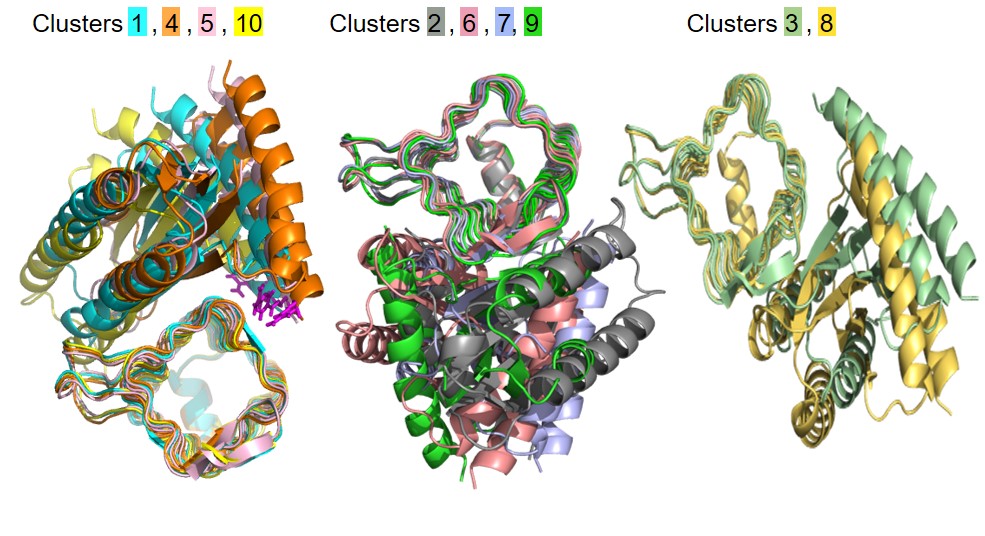

Supplement: supp [file elife-59190-supp-v1.zip › elife_poa_e59190_Figure_2_figure_supplement_1.jpg]

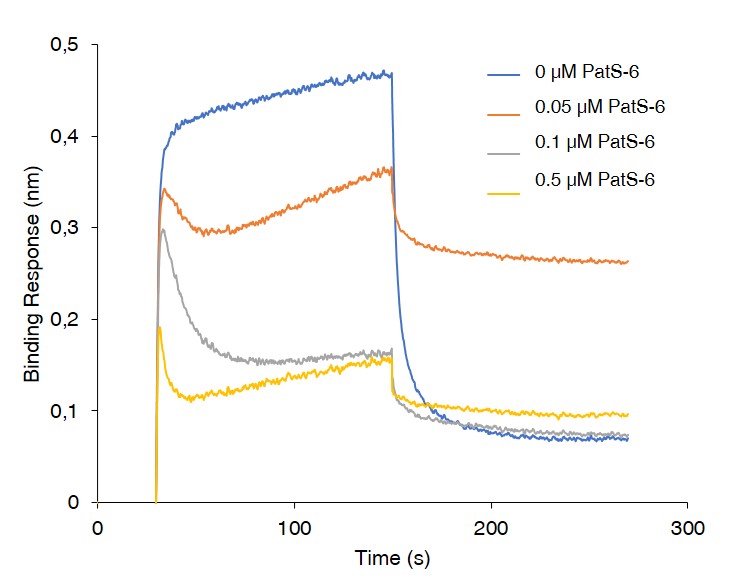

Supplement: supp [file elife-59190-supp-v1.zip › elife_poa_e59190_Figure_2_figure_supplement_2.jpg]

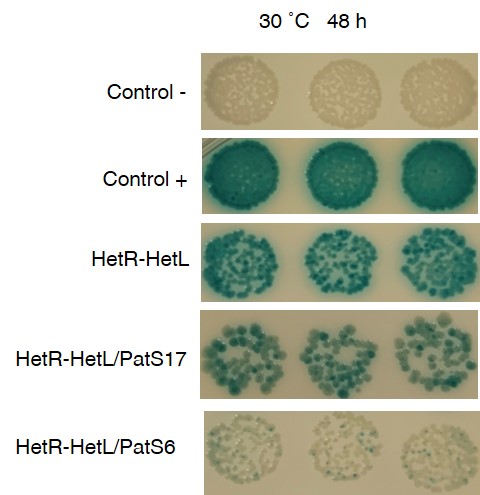

Supplement: supp [file elife-59190-supp-v1.zip › elife_poa_e59190_Figure_2_figure_supplement_3.jpg]

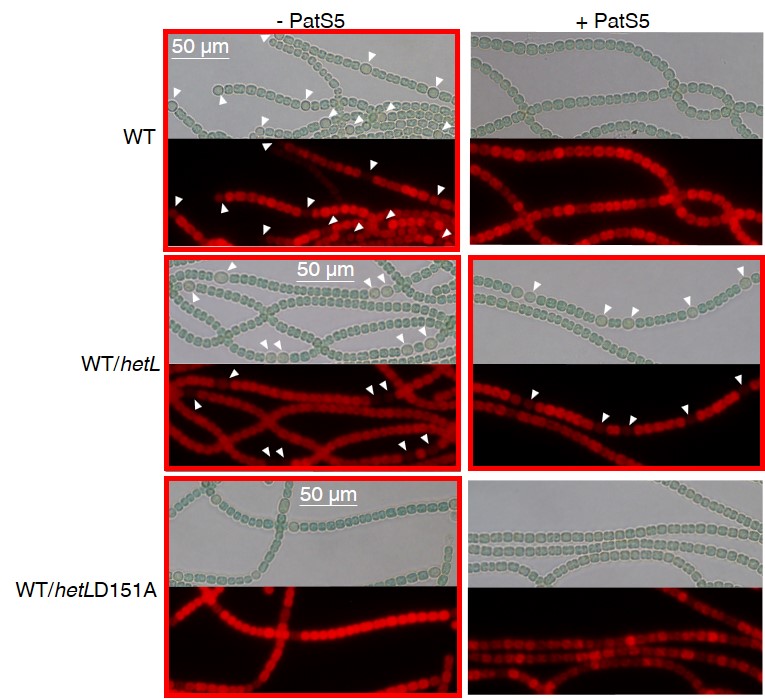

Supplement: supp [file elife-59190-supp-v1.zip › elife_poa_e59190_Figure_4_figure_supplement_1.jpg]
